# Supplementary material for: Isolation and analysis of tumor-derived extracellular vesicles from head and neck squamous cell carcinoma plasma by galectin-based glycan recognition particles
Source: PubMed Central journal article supplement — Int J Oncol. 2022 Sep 19;61(5):133. doi: 10.3892/ijo.2022.5423 (PMC9507089; doi:10.3892/ijo.2022.5423), 2022-09-19

Figure S1. Bead-based flow cytometry analysis of EV surface markers using FlowJo™. (A) EV surface markers of plasma EV-EXÖBead® complexes (patients: n=3 and healthy controls: n=3) are shown as reduced geometric mean fluorescence intensity of CD9, CD63, CD81 and PD-L1 in the negative control. (B) CD9<sup>+</sup> CD81<sup>+</sup> CD63<sup>+</sup> PD-L1<sup>+</sup> of plasma EV-EXÖBead® complex (patients: n=3 and healthy controls: n=3). (C) CD9<sup>+</sup> CD81<sup>+</sup> CD63<sup>Neg</sup> PD-L1<sup>+</sup> of plasma EV-EXÖBead® complex (patients: n=3 and healthy controls: n=3). (D) CD9<sup>+</sup> CD81<sup>Neg</sup> CD63<sup>Neg</sup> PD-L1<sup>+</sup> of plasma EV-EXÖBead® complex (patients: n=3 and healthy controls: n=3). (E) CD9<sup>+</sup> CD81<sup>Neg</sup> CD63<sup>+</sup> PD-L1<sup>+</sup> of plasma EV-EXÖBead® complex (patients: n=3 and healthy controls: n=3). EV, extracellular vesicle.

A

a

CD9-APC  
Control 1: D26  
Control 2: D41  
Control 3: D42  
HNSCC 1: D29  
HNSCC 2: D30  
HNSCC 3: D31

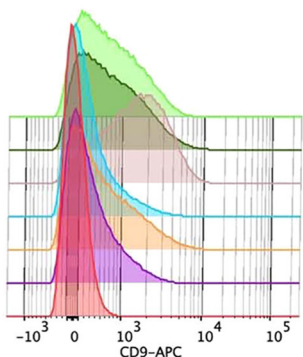

| Sample Name                                                 | Geometric Mean : APC-A |
|-------------------------------------------------------------|------------------------|
| Specimen_001_EF (USB)_005.fcs                               | 55.6                   |
| Specimen_001_26 (USB plasma 250 ul)+ 1 ml EXOBUFFER_006.fcs | 308                    |
| Specimen_001_41 (USB plasma 250 ul)+ 1 ml EXOBUFFER_010.fcs | 506                    |
| Specimen_001_42 (USB plasma 250 ul)+ 1 ml EXOBUFFER_011.fcs | 262                    |
| Specimen_001_29 (USB plasma 250 ul)+ 1 ml EXOBUFFER_007.fcs | 1331                   |
| Specimen_001_30 (USB plasma 250 ul)+ 1 ml EXOBUFFER_008.fcs | 682                    |
| Specimen_001_31 (USB plasma 250 ul)+ 1 ml EXOBUFFER_009.fcs | 615                    |

b

CD63-PE-CY7  
Control 1: D26  
Control 2: D41  
Control 3: D42  
HNSCC 1: D29  
HNSCC 2: D30  
HNSCC 3: D31

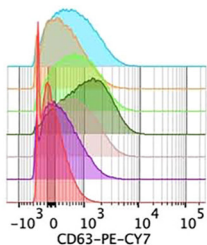

| Sample Name                                                 | Geometric Mean : PE-Cy7-A |
|-------------------------------------------------------------|---------------------------|
| Specimen_001_EF (USB)_005.fcs                               | 38.0                      |
| Specimen_001_26 (USB plasma 250 ul)+ 1 ml EXOBUFFER_006.fcs | 292                       |
| Specimen_001_29 (USB plasma 250 ul)+ 1 ml EXOBUFFER_007.fcs | 638                       |
| Specimen_001_30 (USB plasma 250 ul)+ 1 ml EXOBUFFER_008.fcs | 1065                      |
| Specimen_001_31 (USB plasma 250 ul)+ 1 ml EXOBUFFER_009.fcs | 720                       |
| Specimen_001_41 (USB plasma 250 ul)+ 1 ml EXOBUFFER_010.fcs | 360                       |
| Specimen_001_42 (USB plasma 250 ul)+ 1 ml EXOBUFFER_011.fcs | 578                       |

c

CD81-FITC  
Control 1: D26  
Control 2: D41  
Control 3: D42  
HNSCC 1: D29  
HNSCC 2: D30  
HNSCC 3: D31

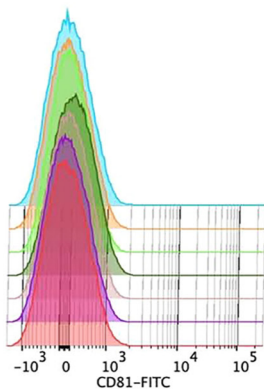

| Sample Name                                                 | Geometric Mean : FITC-A |
|-------------------------------------------------------------|-------------------------|
| Specimen_001_EF (USB)_005.fcs                               | 63.3                    |
| Specimen_001_26 (USB plasma 250 ul)+ 1 ml EXOBUFFER_006.fcs | 57.0                    |
| Specimen_001_29 (USB plasma 250 ul)+ 1 ml EXOBUFFER_007.fcs | 97.0                    |
| Specimen_001_30 (USB plasma 250 ul)+ 1 ml EXOBUFFER_008.fcs | 163                     |
| Specimen_001_31 (USB plasma 250 ul)+ 1 ml EXOBUFFER_009.fcs | 88.7                    |
| Specimen_001_41 (USB plasma 250 ul)+ 1 ml EXOBUFFER_010.fcs | 50.2                    |
| Specimen_001_42 (USB plasma 250 ul)+ 1 ml EXOBUFFER_011.fcs | 59.0                    |

d

PD-L1-eF450  
Control 1: D26  
Control 2: D41  
Control 3: D42  
HNSCC 1: D29  
HNSCC 2: D30  
HNSCC 3: D31

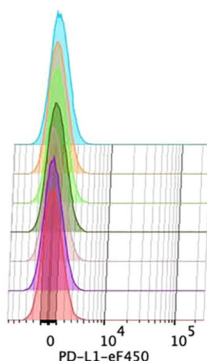

| Sample Name                                                 | Geometric Mean : BV421-A |
|-------------------------------------------------------------|--------------------------|
| Specimen_001_EF (USB)_005.fcs                               | 575                      |
| Specimen_001_26 (USB plasma 250 ul)+ 1 ml EXOBUFFER_006.fcs | 519                      |
| Specimen_001_29 (USB plasma 250 ul)+ 1 ml EXOBUFFER_007.fcs | 583                      |
| Specimen_001_30 (USB plasma 250 ul)+ 1 ml EXOBUFFER_008.fcs | 646                      |
| Specimen_001_31 (USB plasma 250 ul)+ 1 ml EXOBUFFER_009.fcs | 594                      |
| Specimen_001_41 (USB plasma 250 ul)+ 1 ml EXOBUFFER_010.fcs | 493                      |
| Specimen_001_42 (USB plasma 250 ul)+ 1 ml EXOBUFFER_011.fcs | 545                      |

Figure S1. Continued.

B

CD9+ CD81+CD63+ PD-L1+  
 Control 1: D26  
 Control 2: D41  
 Control 3: D42  
 HNSCC 1: D29  
 HNSCC 2: D30  
 HNSCC 3: D31

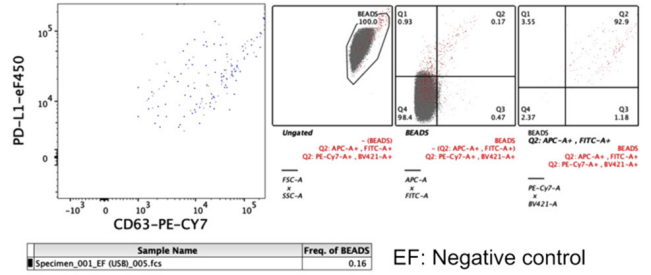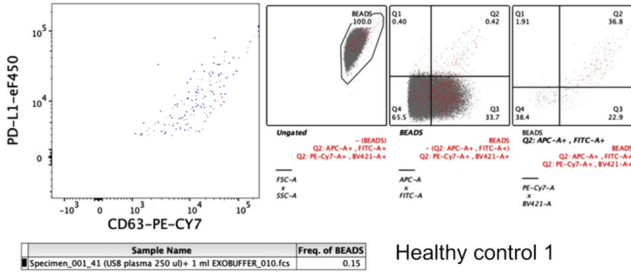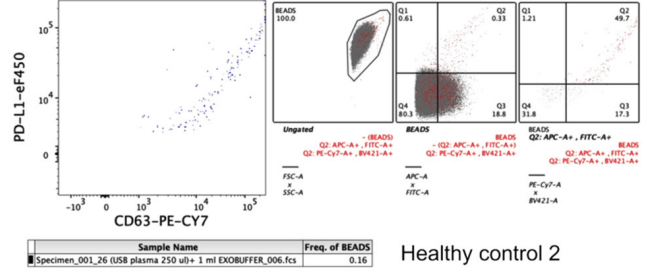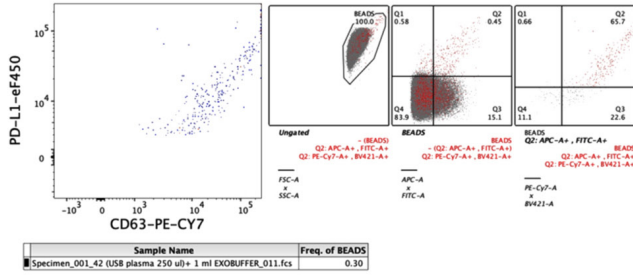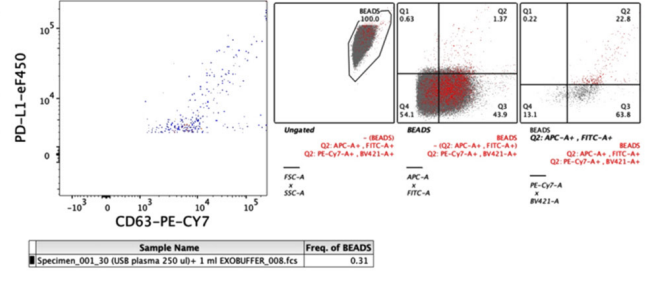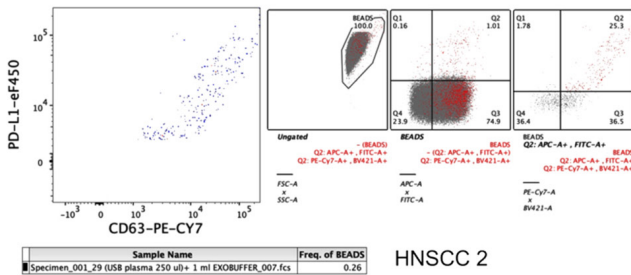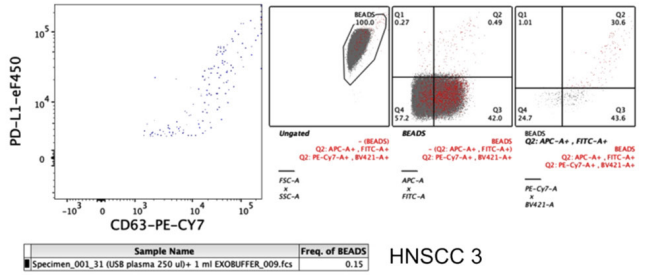



Figure S1. Continued.

C

CD9+ CD81+CD63Neg PD-L1+  
 Control 1: D26  
 Control 2: D41  
 Control 3: D42  
 HNSCC 1: D29  
 HNSCC 2: D30  
 HNSCC 3: D31

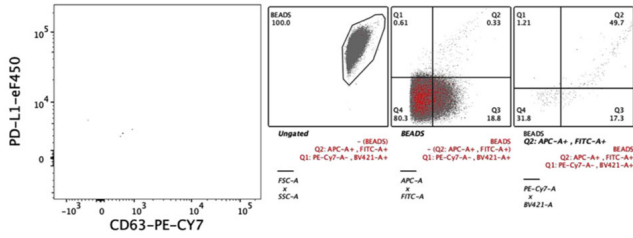

| Sample Name                                                 | Freq. of BEADS |
|-------------------------------------------------------------|----------------|
| Specimen_001_26 (USB plasma 250 ul)+ 1 ml EXOBUFFER_006.fcs | 4.00E-3        |

Healthy control 1

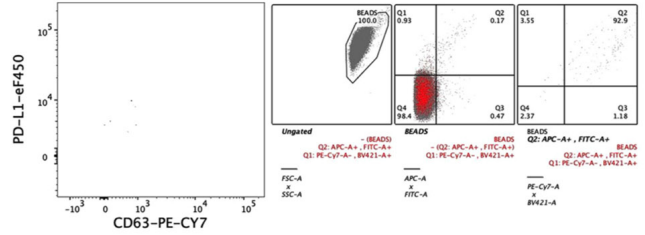

| Sample Name                   | Freq. of BEADS |
|-------------------------------|----------------|
| Specimen_001_EF (USB_005.fcs) | 5.99E-3        |

EF: Negative control

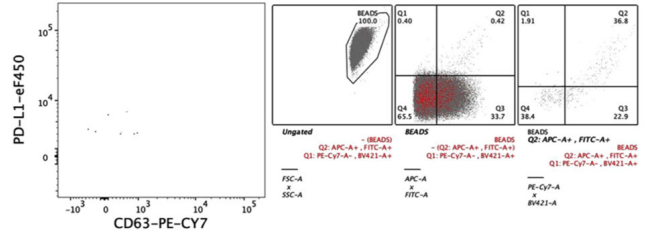

| Sample Name                                                 | Freq. of BEADS |
|-------------------------------------------------------------|----------------|
| Specimen_001_41 (USB plasma 250 ul)+ 1 ml EXOBUFFER_010.fcs | 8.00E-3        |

Healthy control 2

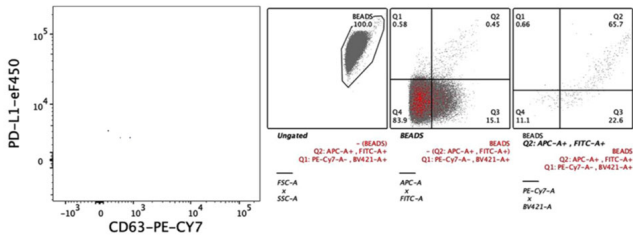

| Sample Name                                                 | Freq. of BEADS |
|-------------------------------------------------------------|----------------|
| Specimen_001_42 (USB plasma 250 ul)+ 1 ml EXOBUFFER_011.fcs | 3.00E-3        |

Healthy control 3

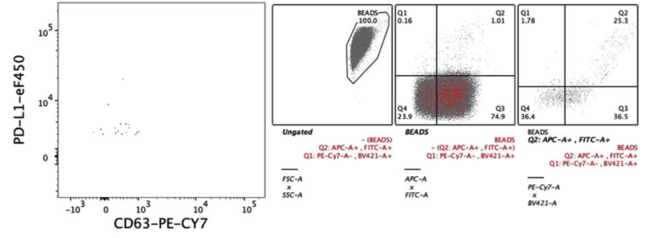

| Sample Name                                                 | Freq. of BEADS |
|-------------------------------------------------------------|----------------|
| Specimen_001_29 (USB plasma 250 ul)+ 1 ml EXOBUFFER_007.fcs | 0.018          |

HNSCC 1

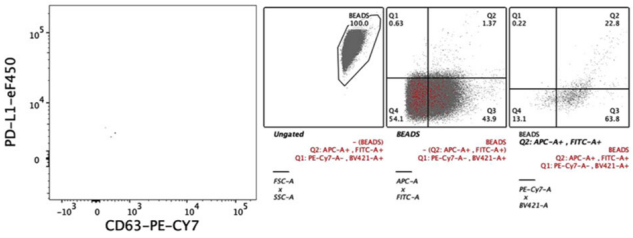

| Sample Name                                                 | Freq. of BEADS |
|-------------------------------------------------------------|----------------|
| Specimen_001_30 (USB plasma 250 ul)+ 1 ml EXOBUFFER_008.fcs | 3.00E-3        |

HNSCC 2

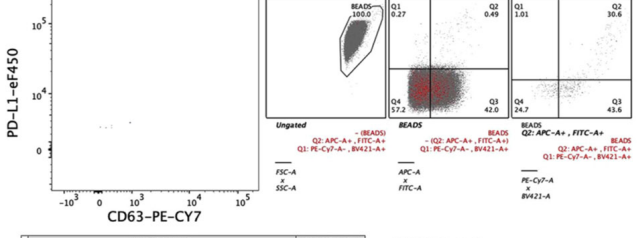

| Sample Name                                                 | Freq. of BEADS |
|-------------------------------------------------------------|----------------|
| Specimen_001_31 (USB plasma 250 ul)+ 1 ml EXOBUFFER_009.fcs | 5.00E-3        |

HNSCC 3

Figure S1. Continued.

**D** CD9+ CD81Neg CD63Neg PD-L1+  
 Control 1: D26  
 Control 2: D41  
 Control 3: D42  
 HNSCC 1: D29  
 HNSCC 2: D30  
 HNSCC 3: D31

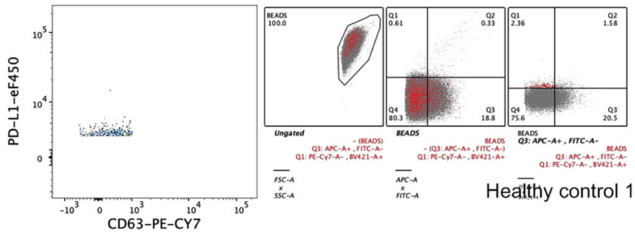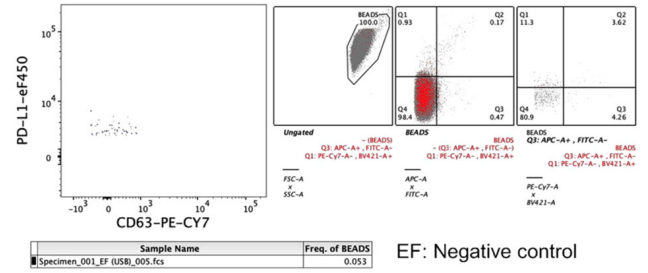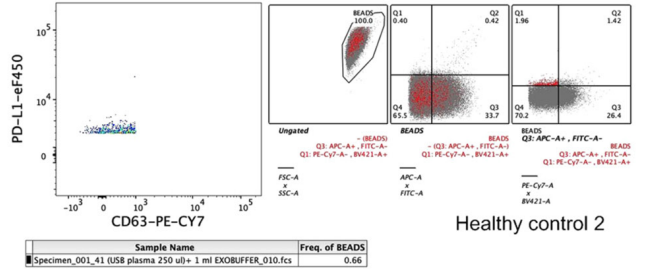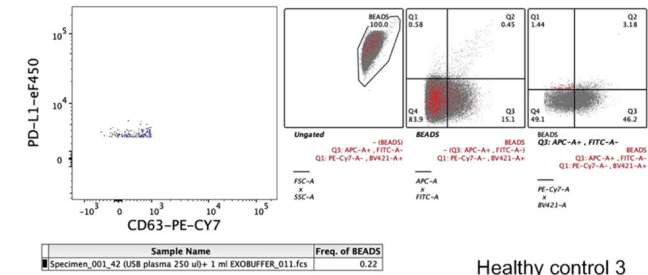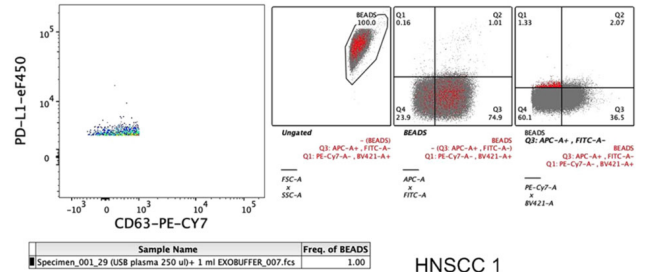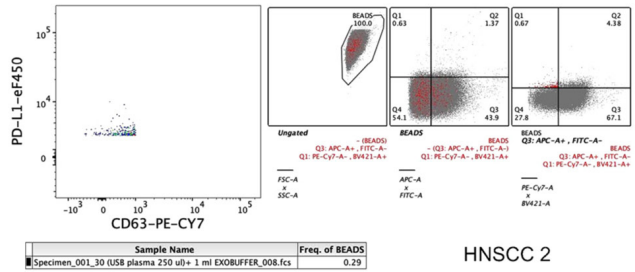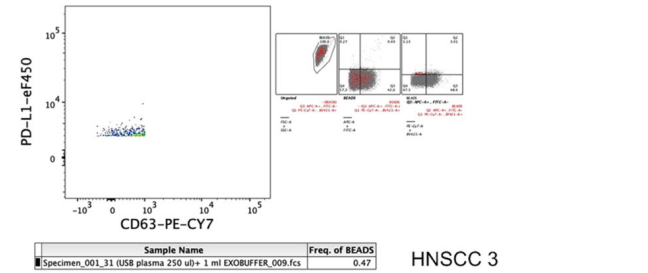

Figure S1. Continued.

E

CD9+ CD81NegCD63+ PD-L1+

Control 1: D26

Control 2: D41

Control 3: D42

HNSCC 1: D29

HNSCC 2: D30

HNSCC 3: D31

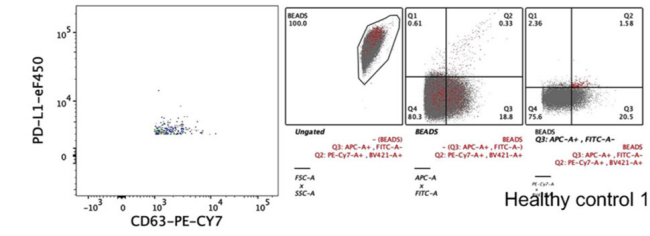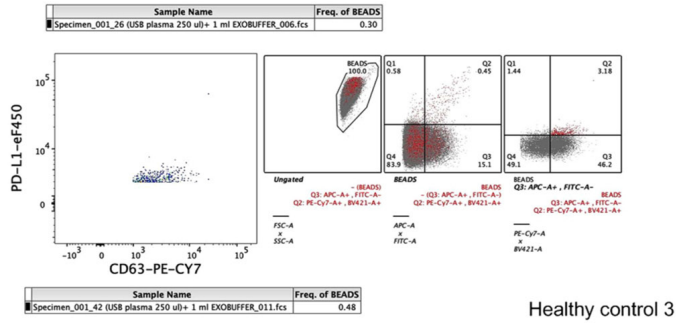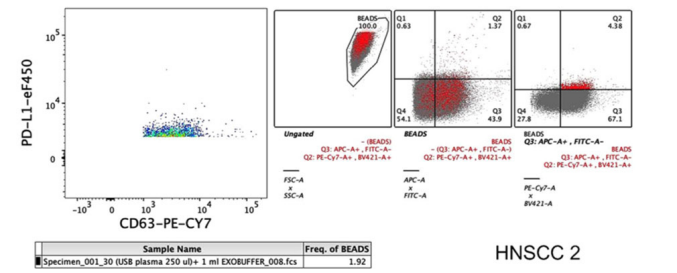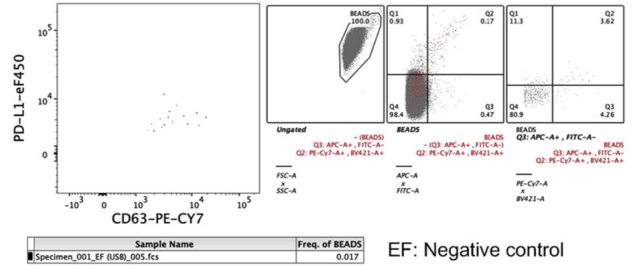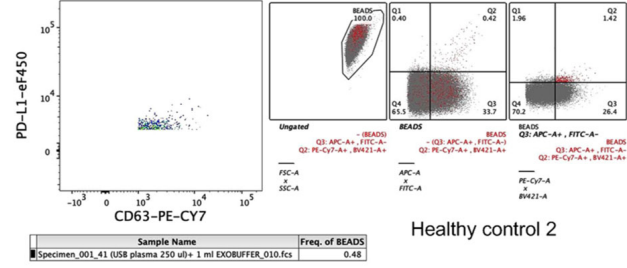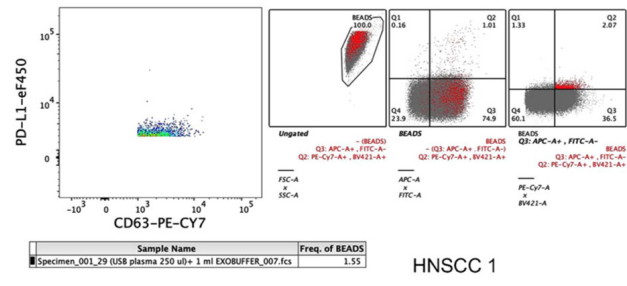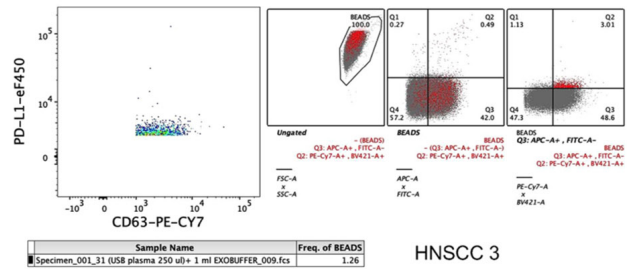

Figure S2. Bead-based flow cytometric analysis of EV intracellular marker and non-EV marker. (A) Intracellular EVs markers (TSG101) and non-EV markers (ApoA1) of plasma EVs-EXÖBead® complexes and unbound plasma fraction magnetic bead complexes (n=3) are shown as reduced geometric mean fluorescence intensity (MFI) in the negative control. (B) PanEV<sup>+/Neg</sup> and ApoA1<sup>+/Neg</sup> populations of the plasma EVs-EXÖBead® complex and SEC (Izon qEVoriginal 70) plasma EVs-magnetic beads complex are expressed as percentages by gating with FlowJo™. EV, extracellular vesicle.

**A**

Intracellular staining  
 Negative control of EF-Exobead complex: EF intra  
 EV-Exobead complex sample 1: C intra  
 EV-Exobead complex sample 2: 23\_2 intra  
 EV-Exobead complex sample 3: 35\_3 intra  
 Negative control of EF-beads complex: EF after supe control intra  
 Unbound plasma-beads complex sample 1: C after supe intra  
 Unbound plasma-beads complex sample 2: 23\_2 after supe intra  
 Unbound plasma-beads complex sample 3: 35\_3 after supe intra

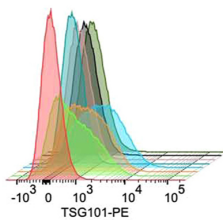

| Sample Name                                      | Geometric Mean : PE-A |
|--------------------------------------------------|-----------------------|
| Specimen_001_EF intra_001.fcs                    | 166                   |
| Specimen_001_C intra_002.fcs                     | 694                   |
| Specimen_001_23_2 intra_003.fcs                  | 945                   |
| Specimen_001_35_3 intra_004.fcs                  | 1346                  |
| Specimen_001_EF after supe control intra_009.fcs | 99.5                  |
| Specimen_001_C after supe intra_010.fcs          | 133                   |
| Specimen_001_23_2 after supe intra_011.fcs       | 153                   |
| Specimen_001_35_3 after supe intra_012.fcs       | 185                   |

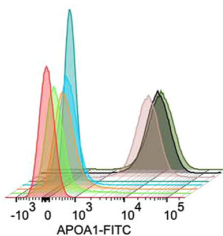

| Sample Name                                      | Geometric Mean : FITC-A |
|--------------------------------------------------|-------------------------|
| Specimen_001_EF intra_001.fcs                    | 40.0                    |
| Specimen_001_C intra_002.fcs                     | 183                     |
| Specimen_001_23_2 intra_003.fcs                  | 276                     |
| Specimen_001_35_3 intra_004.fcs                  | 179                     |
| Specimen_001_EF after supe control intra_009.fcs | 32.8                    |
| Specimen_001_C after supe intra_010.fcs          | 6451                    |
| Specimen_001_23_2 after supe intra_011.fcs       | 8291                    |
| Specimen_001_35_3 after supe intra_012.fcs       | 6963                    |



Figure S2. Continued.

B

Intracellular staining

Negative control of EF-Exobead complex: EF+EXOBEAD (030321)

EV-Exobead complex 1: C10 500UL+EXOBEAD (030321)

EV-Exobead complex 1: C11 500UL+EXOBEAD (030321)

EV-Exobead complex 1: C13 500UL+EXOBEAD (030321)

Negative control of EF-bead complex: EF+magnetic bead SEC (030321)

SEC-bead complex (qEV 70 mm column) 1: C10 SEC 7-10+ magnetic bead SEC (030321)

SEC-bead complex (qEV 70 mm column) 2: C11 SEC 7-10+ magnetic bead SEC (030321)

SEC-bead complex (qEV 70 mm column) 3: C13 SEC 7-10+ magnetic bead SEC (030321)

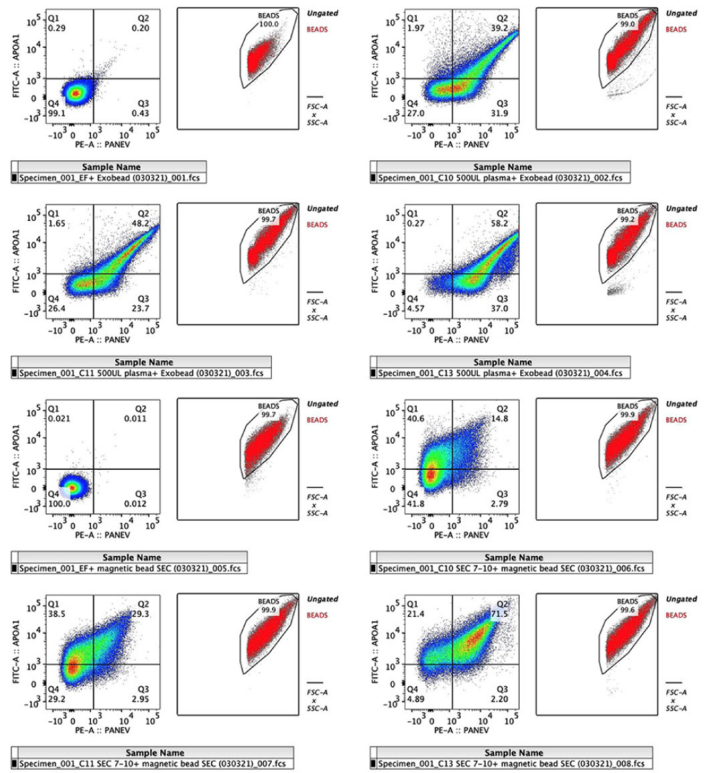

Figure S3. Bead-based flow cytometric analysis of HNSCC biomarkers, evaluated using FlowJo™. (A) EVs surface marker (PanEV), leukocyte common marker (CD45) and HNSCC markers (EpCAM, PanCK and PD-L1) of plasma EVs-EXÖBead® complexes (patients: n=9 and healthy controls: n=9 are shown as reduced geometric mean fluorescence intensity (MFI) in the negative control. (B) PanEV<sup>+/-Neg</sup> CD45<sup>+/-Neg</sup> of single plasma EVs-EXÖBead® complex (patients: n=9 and healthy controls: n=9). (C) PanEV<sup>+/-Neg</sup> EpCAM<sup>+/-Neg</sup> of single plasma EVs-EXÖBead® complex (patients: n=9 and healthy controls: n=9). (D) PanEV<sup>+/-Neg</sup> PD-L1<sup>+/-Neg</sup> of single plasma EVs-EXÖBead® complex (patients: n=9 and healthy controls: n=9). (E) PanEV<sup>+/-Neg</sup> PanCK<sup>+/-Neg</sup> of single plasma EVs-EXÖBead® complex (patients: n=9 and healthy controls: n=9). (F) EpCAM<sup>Neg</sup> PD-L1<sup>+</sup> CD45<sup>Neg</sup> PanEV<sup>+</sup> of single plasma EVs-EXÖBead® complex (patients: n=9 and healthy controls: n=9). (G) EpCAM<sup>+</sup> PD-L1<sup>+</sup> CD45<sup>Neg</sup> PanEV<sup>+</sup> of single plasma EVs-EXÖBead® complex (patients: n=9 and healthy controls: n=9). (H) EpCAM<sup>+</sup> PD-L1<sup>Neg</sup> CD45<sup>Neg</sup> PanEV<sup>+</sup> of single plasma EVs-EXÖBead® complex (patients: n=9 and healthy controls: n=9). (I) EpCAM<sup>Neg</sup> PD-L1<sup>Neg</sup> CD45<sup>Neg</sup> PanEV<sup>+</sup> of single plasma EVs-EXÖBead® complex (patients: n=9 and healthy controls: n=9). (J) EpCAM<sup>Neg</sup> PanCK<sup>+</sup> PD-L1<sup>+</sup> CD45<sup>Neg</sup> PanEV<sup>+</sup> of single plasma EVs-EXÖBead® complex (patients: n=9 and healthy controls: n=9). (K) EpCAM<sup>+</sup> PanCK<sup>+</sup> PD-L1<sup>+</sup> CD45<sup>Neg</sup> PanEV<sup>+</sup> of single plasma EVs-EXÖBead® complex (patients: n=9 and healthy controls: n=9). (L) EpCAM<sup>+</sup> PanCK<sup>Neg</sup> PD-L1<sup>+</sup> CD45<sup>Neg</sup> PanEV<sup>+</sup> of single plasma EVs-EXÖBead® complex (patients: n=9 and healthy controls: n=9). (M) EpCAM<sup>Neg</sup> PanCK<sup>Neg</sup> PD-L1<sup>+</sup> CD45<sup>Neg</sup> PanEV<sup>+</sup> of single plasma EVs-EXÖBead® complex (patients: n=9 and healthy controls: n=9). (N) EpCAM<sup>Neg</sup> PanCK<sup>+</sup> PD-L1<sup>+</sup> CD45<sup>+</sup> PanEV<sup>+</sup> of single plasma EVs-EXÖBead® complex (patients: n=9 and healthy controls: n=9). (O) EpCAM<sup>+</sup> PanCK<sup>+</sup> PD-L1<sup>+</sup> CD45<sup>+</sup> PanEV<sup>+</sup> of single plasma EVs-EXÖBead® complex (patients: n=9 and healthy controls: n=9). (P) EpCAM<sup>+</sup> PanCK<sup>Neg</sup> PD-L1<sup>+</sup> CD45<sup>+</sup> PanEV<sup>+</sup> of single plasma EVs-EXÖBead® complex (patients: n=9 and healthy controls: n=9) were evaluated using FlowJo™. (Q) EpCAM<sup>Neg</sup> PanCK<sup>Neg</sup> PD-L1<sup>+</sup> CD45<sup>+</sup> PanEV<sup>+</sup> of single plasma EVs-EXÖBead® complex (patients: n=9 and healthy controls: n=9). EV, extracellular vesicle; HNSCC, head and neck squamous cell carcinoma.

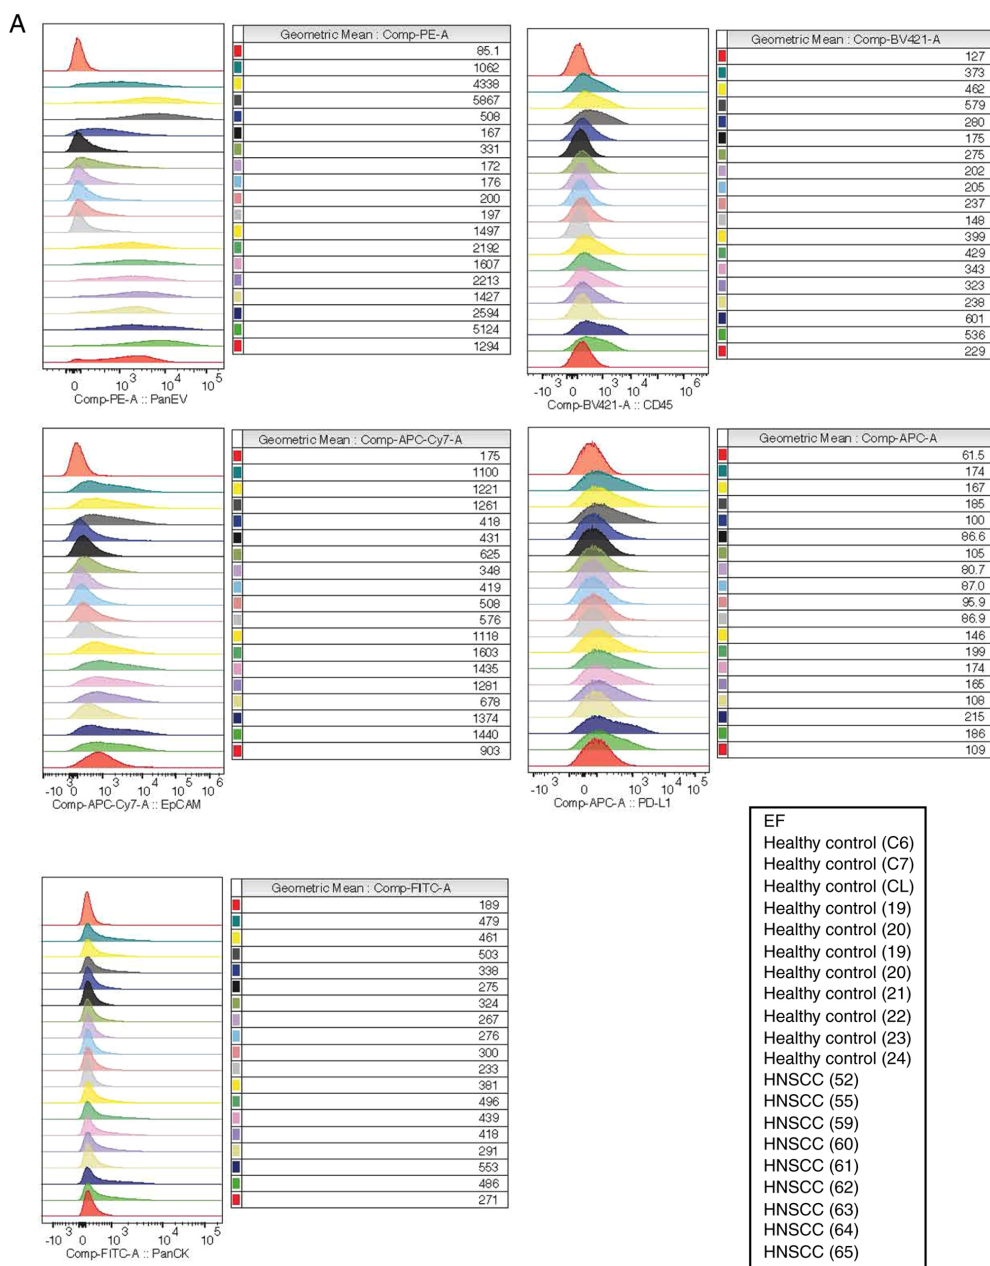

Figure S3. Continued.

B

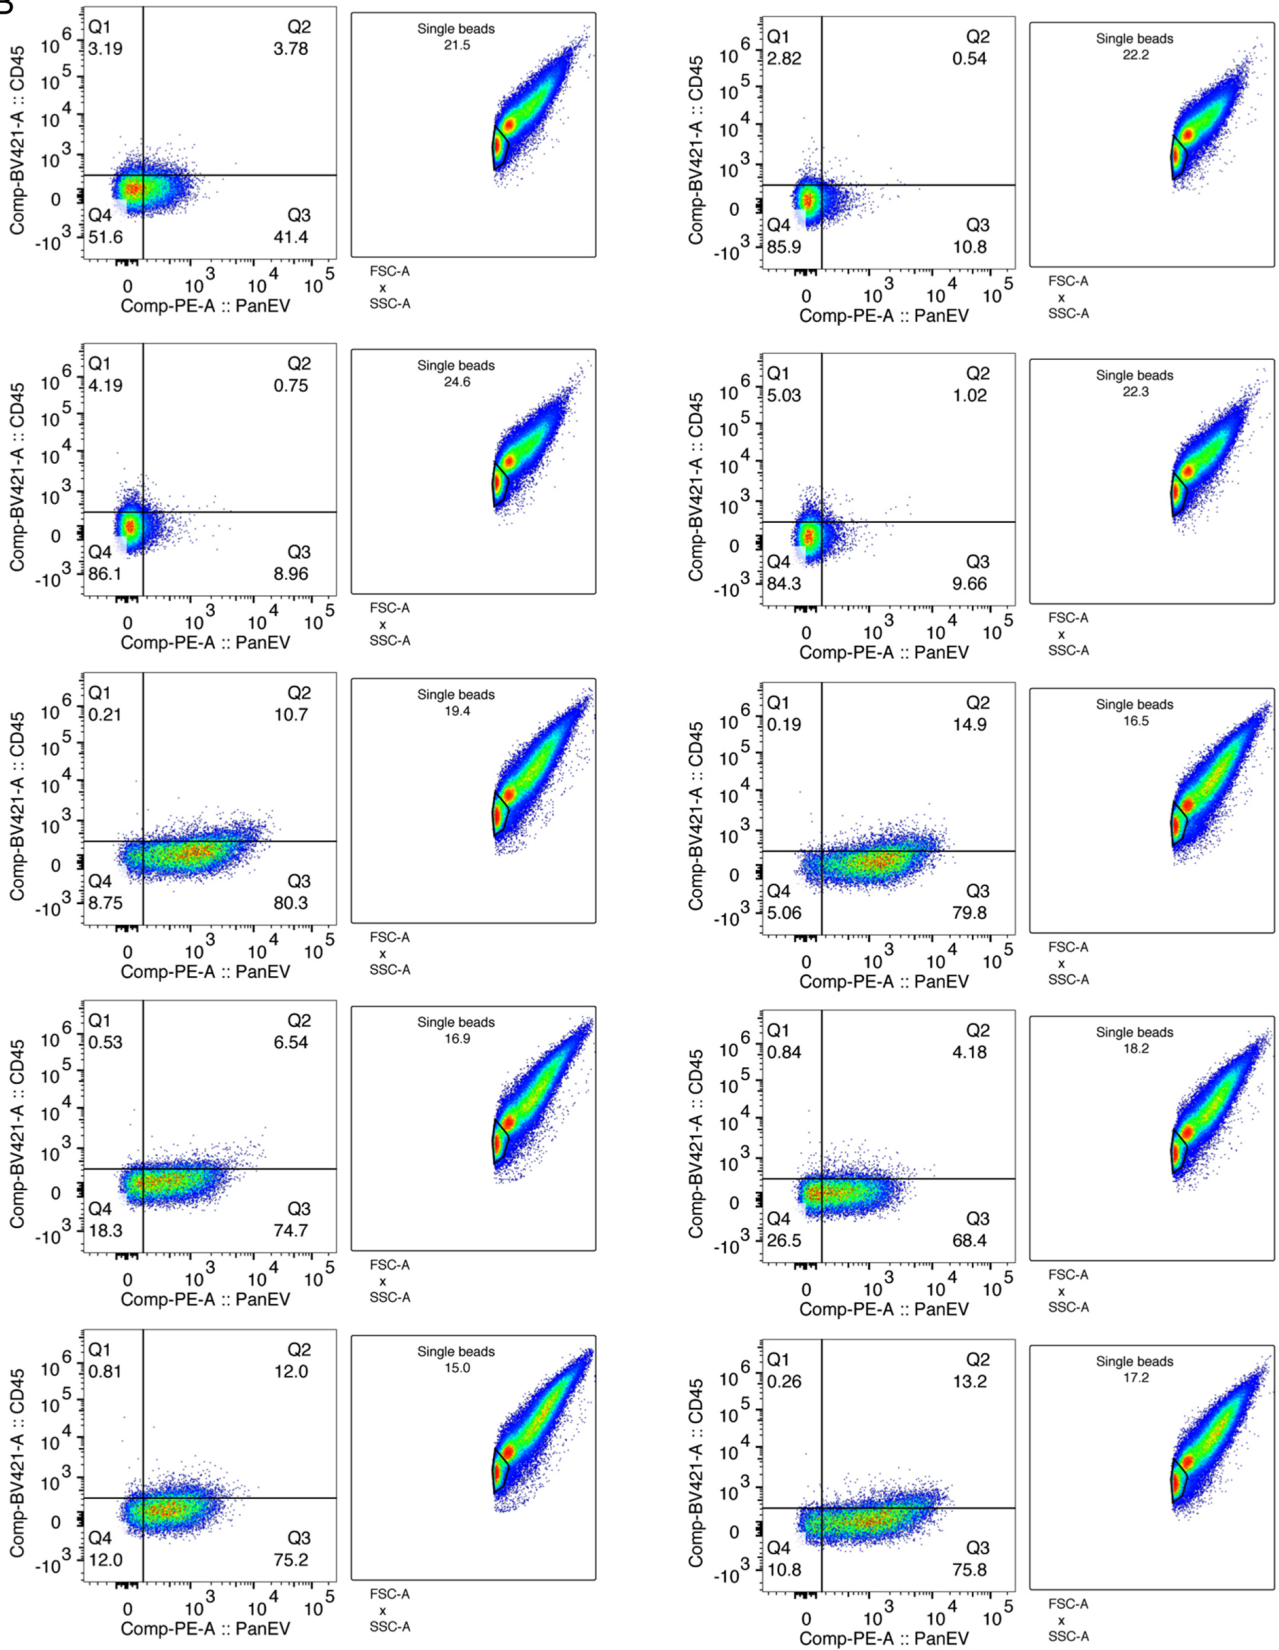

|                      |                      |
|----------------------|----------------------|
| Healthy control (19) | Healthy control (20) |
| Healthy control (23) | Healthy control (24) |
| Healthy control (C7) | Healthy control (CL) |
| HNSCC (59)           | HNSCC (60)           |
| HNSCC (63)           | HNSCC (64)           |

Figure S3. Continued.

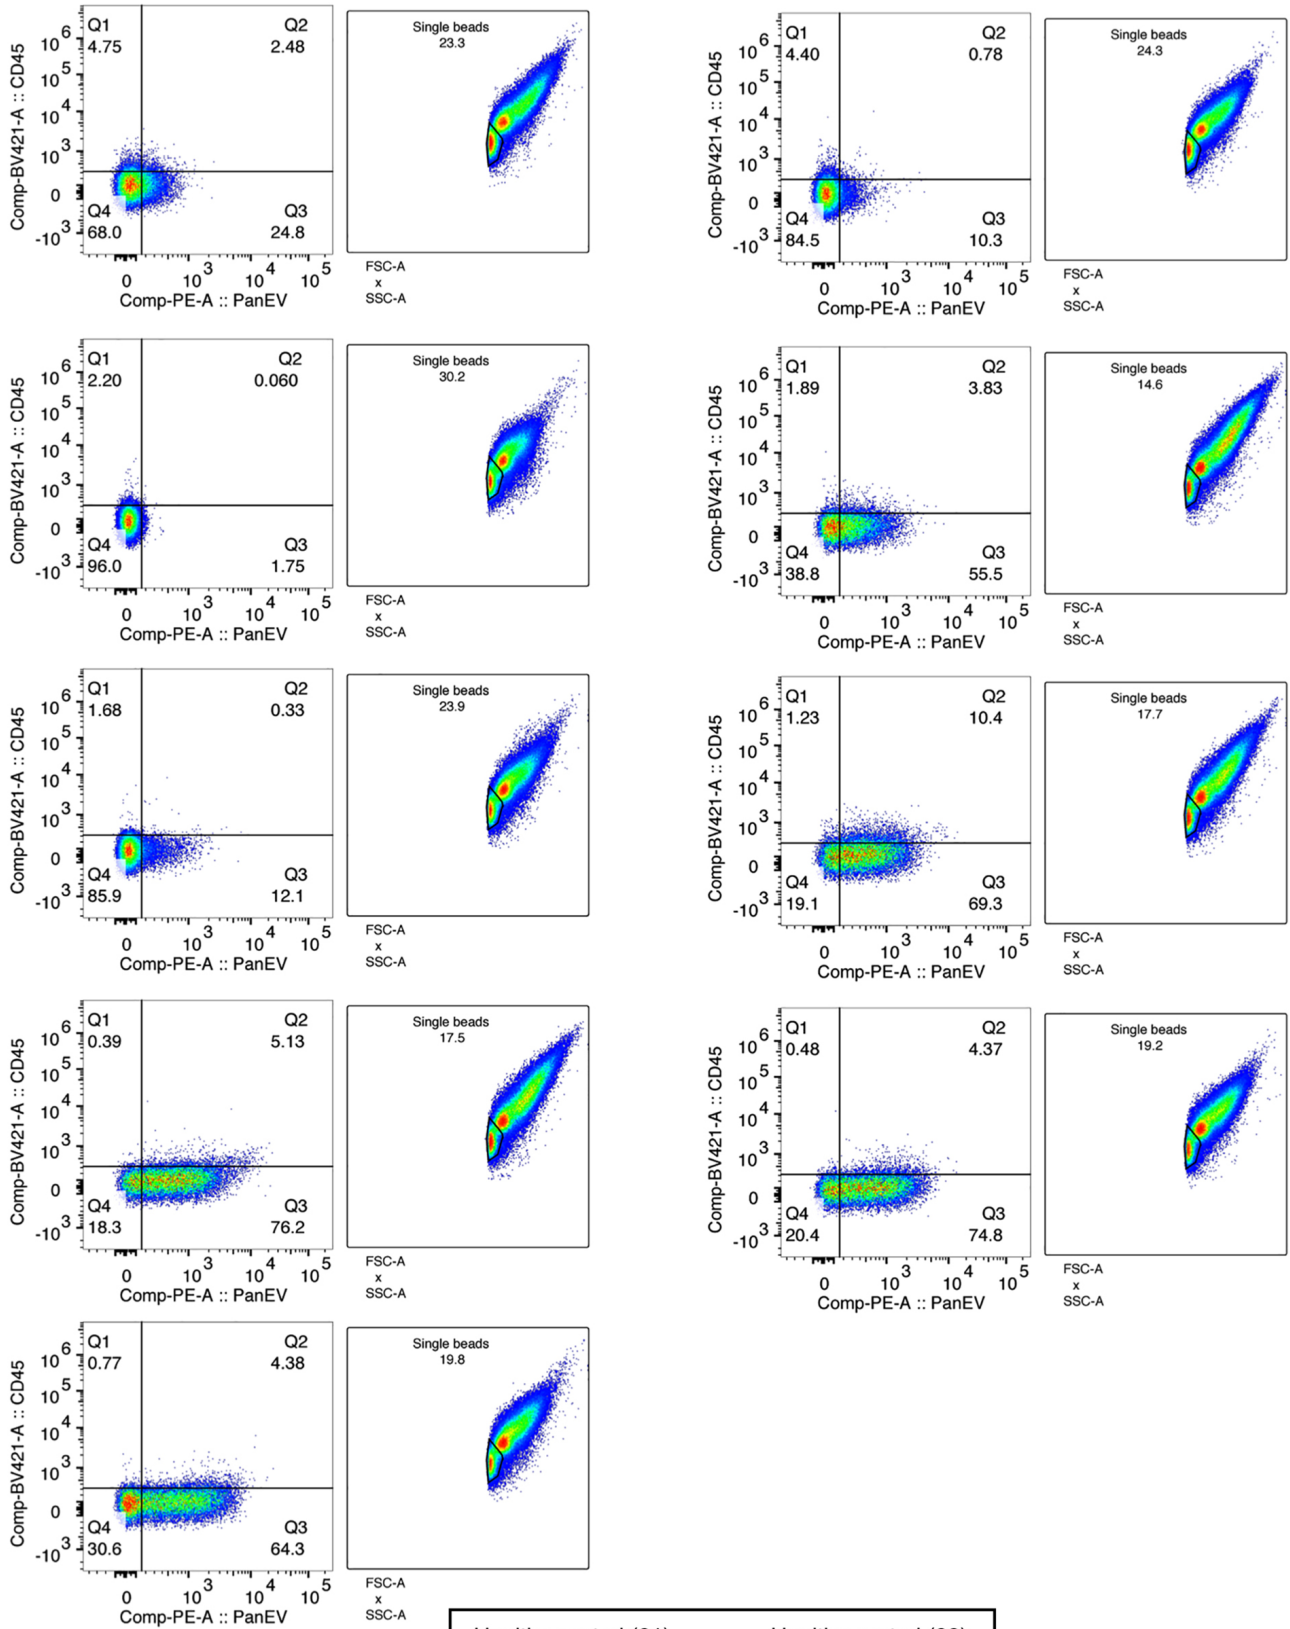

|                       |                      |
|-----------------------|----------------------|
| Healthy control (21)  | Healthy control (22) |
| EF (Negative control) | Healthy control (C6) |
| HNSCC (52)            | HNSCC (55)           |
| HNSCC (61)            | HNSCC (62)           |
| HNSCC (65)            |                      |



Figure S3. Continued.

C

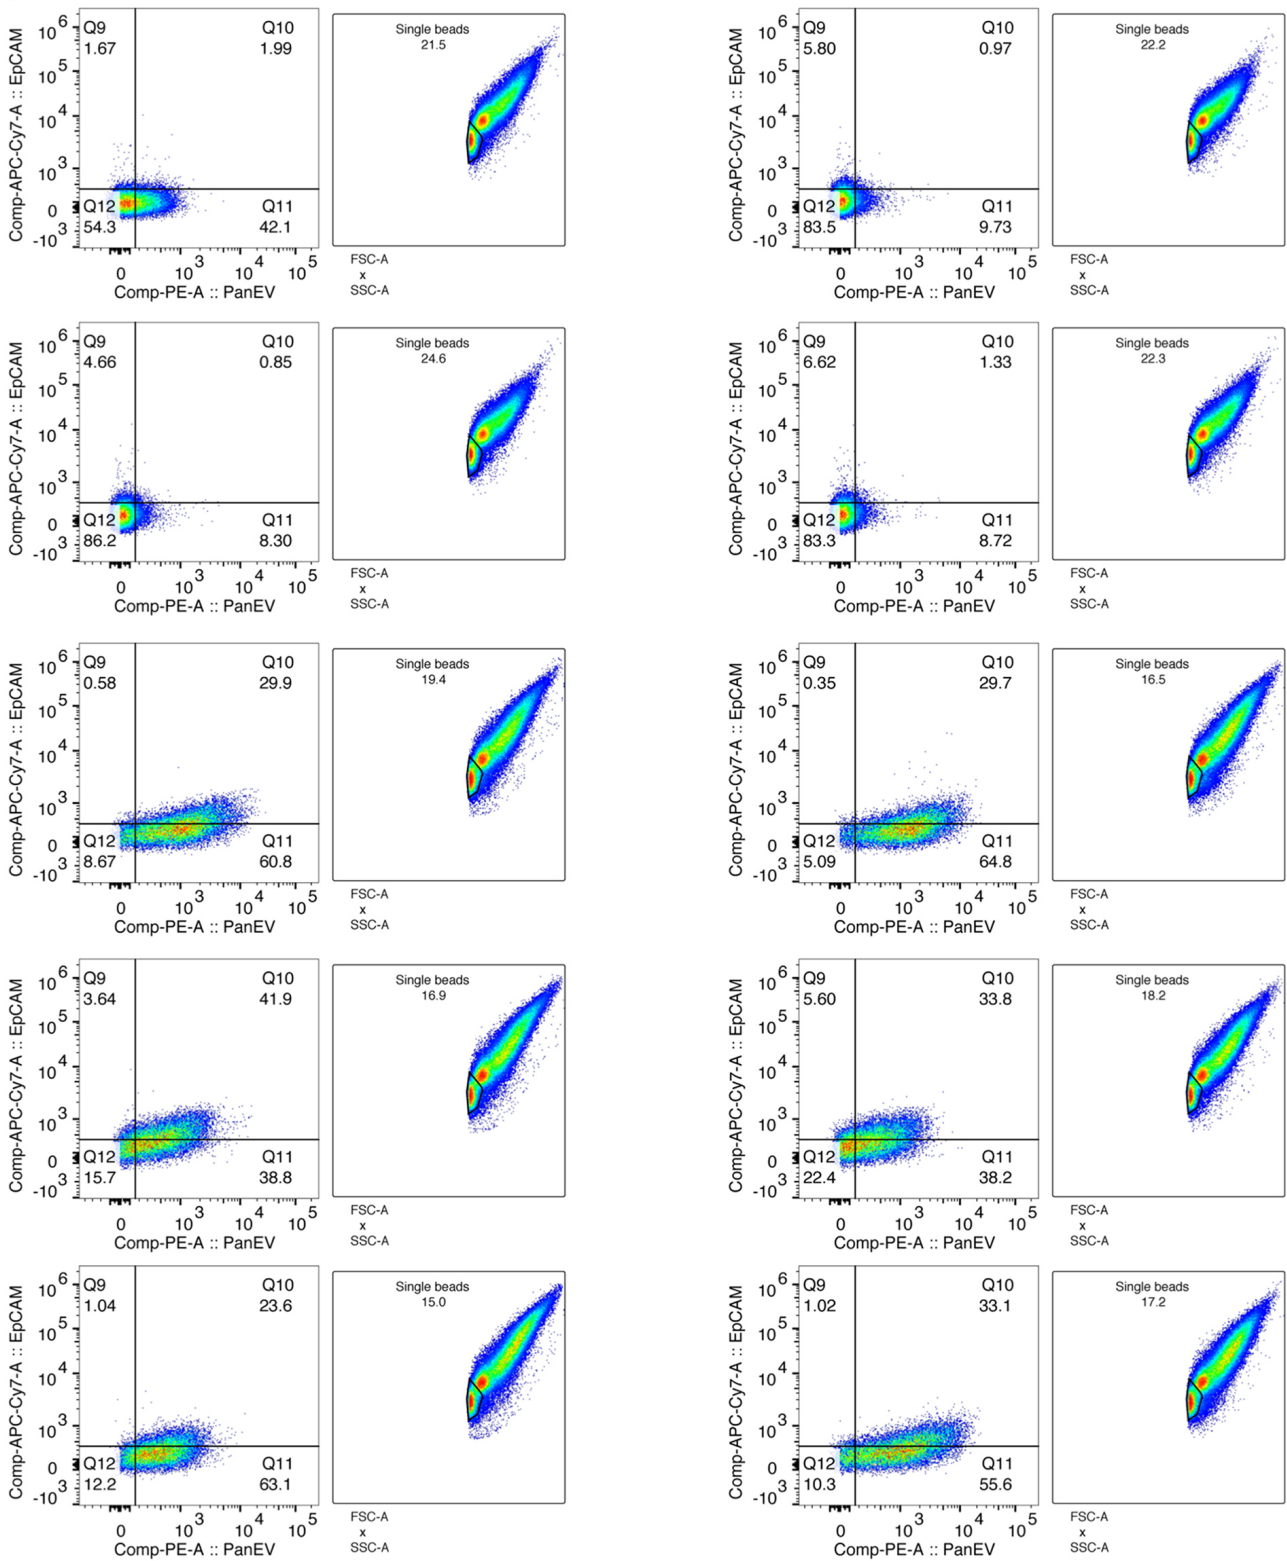

|                      |                      |
|----------------------|----------------------|
| Healthy control (19) | Healthy control (20) |
| Healthy control (23) | Healthy control (24) |
| Healthy control (C7) | Healthy control (CL) |
| HNSCC (59)           | HNSCC (60)           |
| HNSCC (63)           | HNSCC (64)           |

Figure S3. Continued.

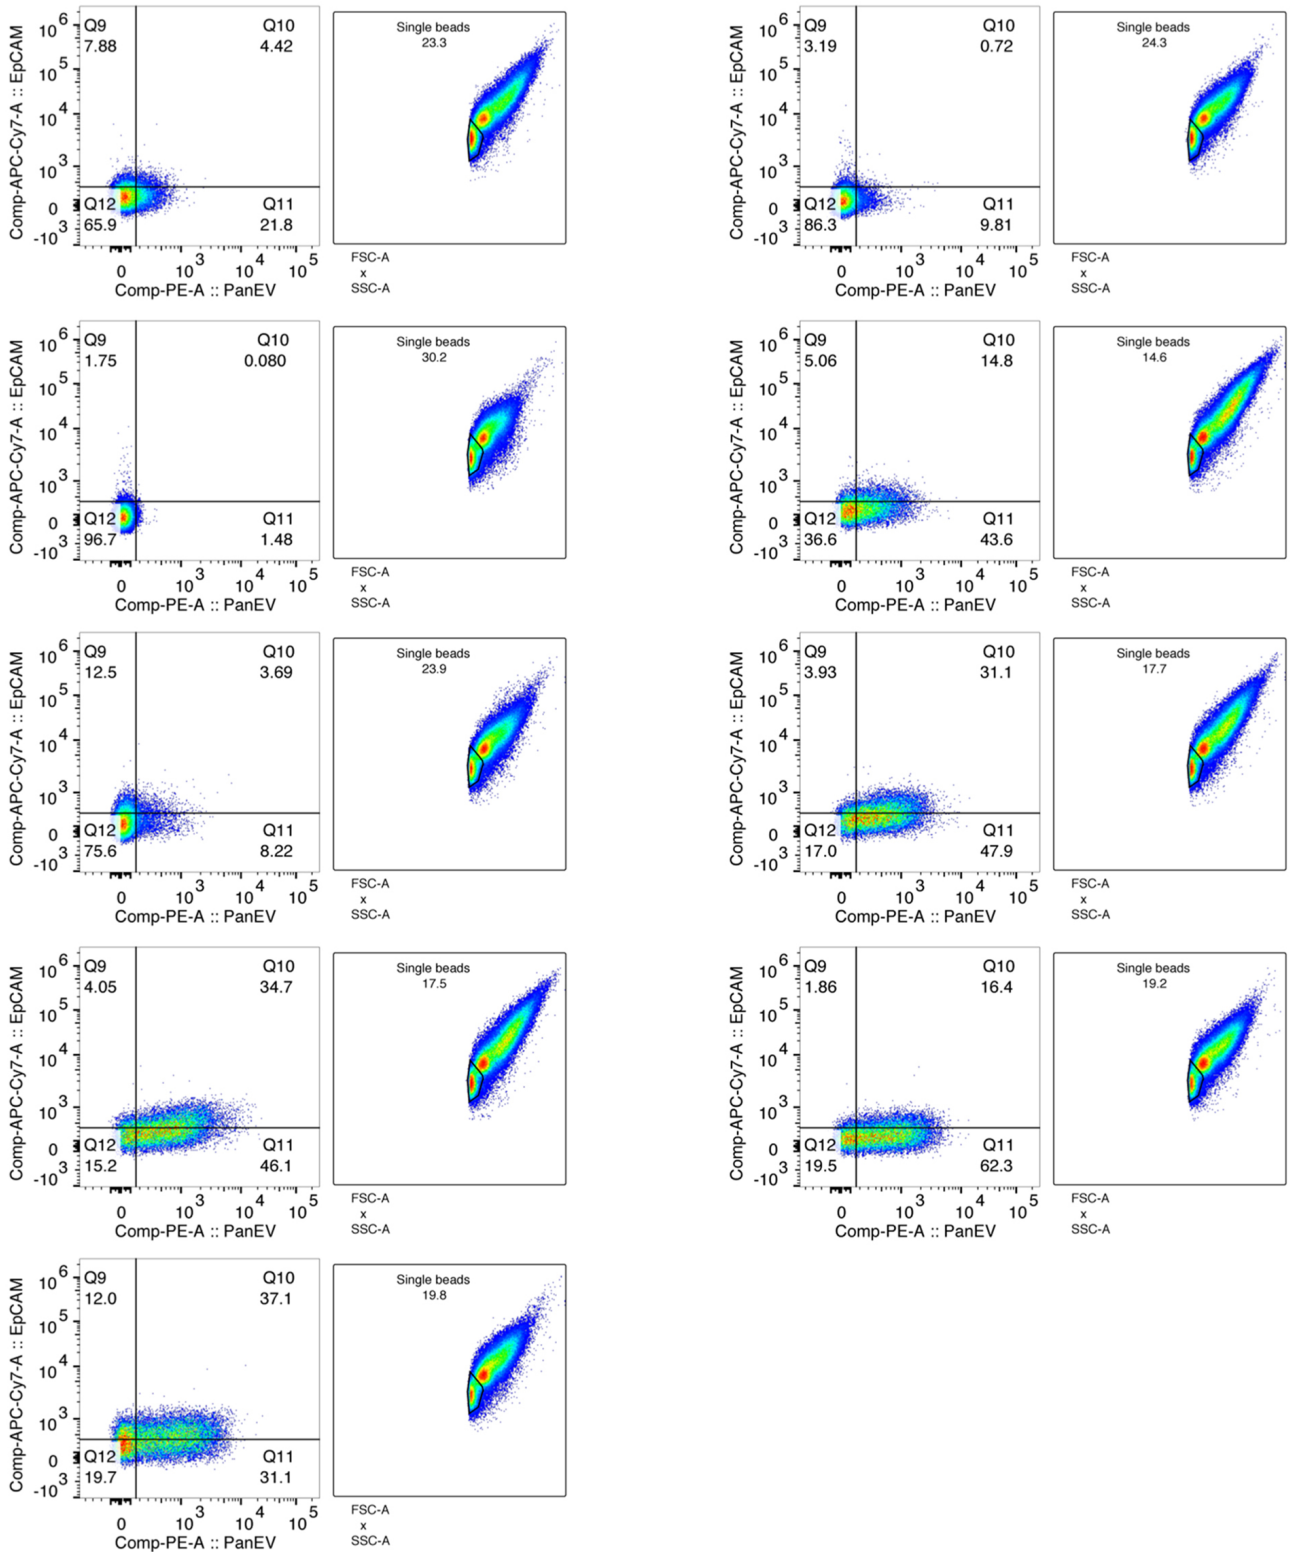

|                       |                      |
|-----------------------|----------------------|
| Healthy control (21)  | Healthy control (22) |
| EF (Negative control) | Healthy control (C6) |
| HNSCC (52)            | HNSCC (55)           |
| HNSCC (61)            | HNSCC (62)           |
| HNSCC (65)            |                      |

Figure S3. Continued.

D

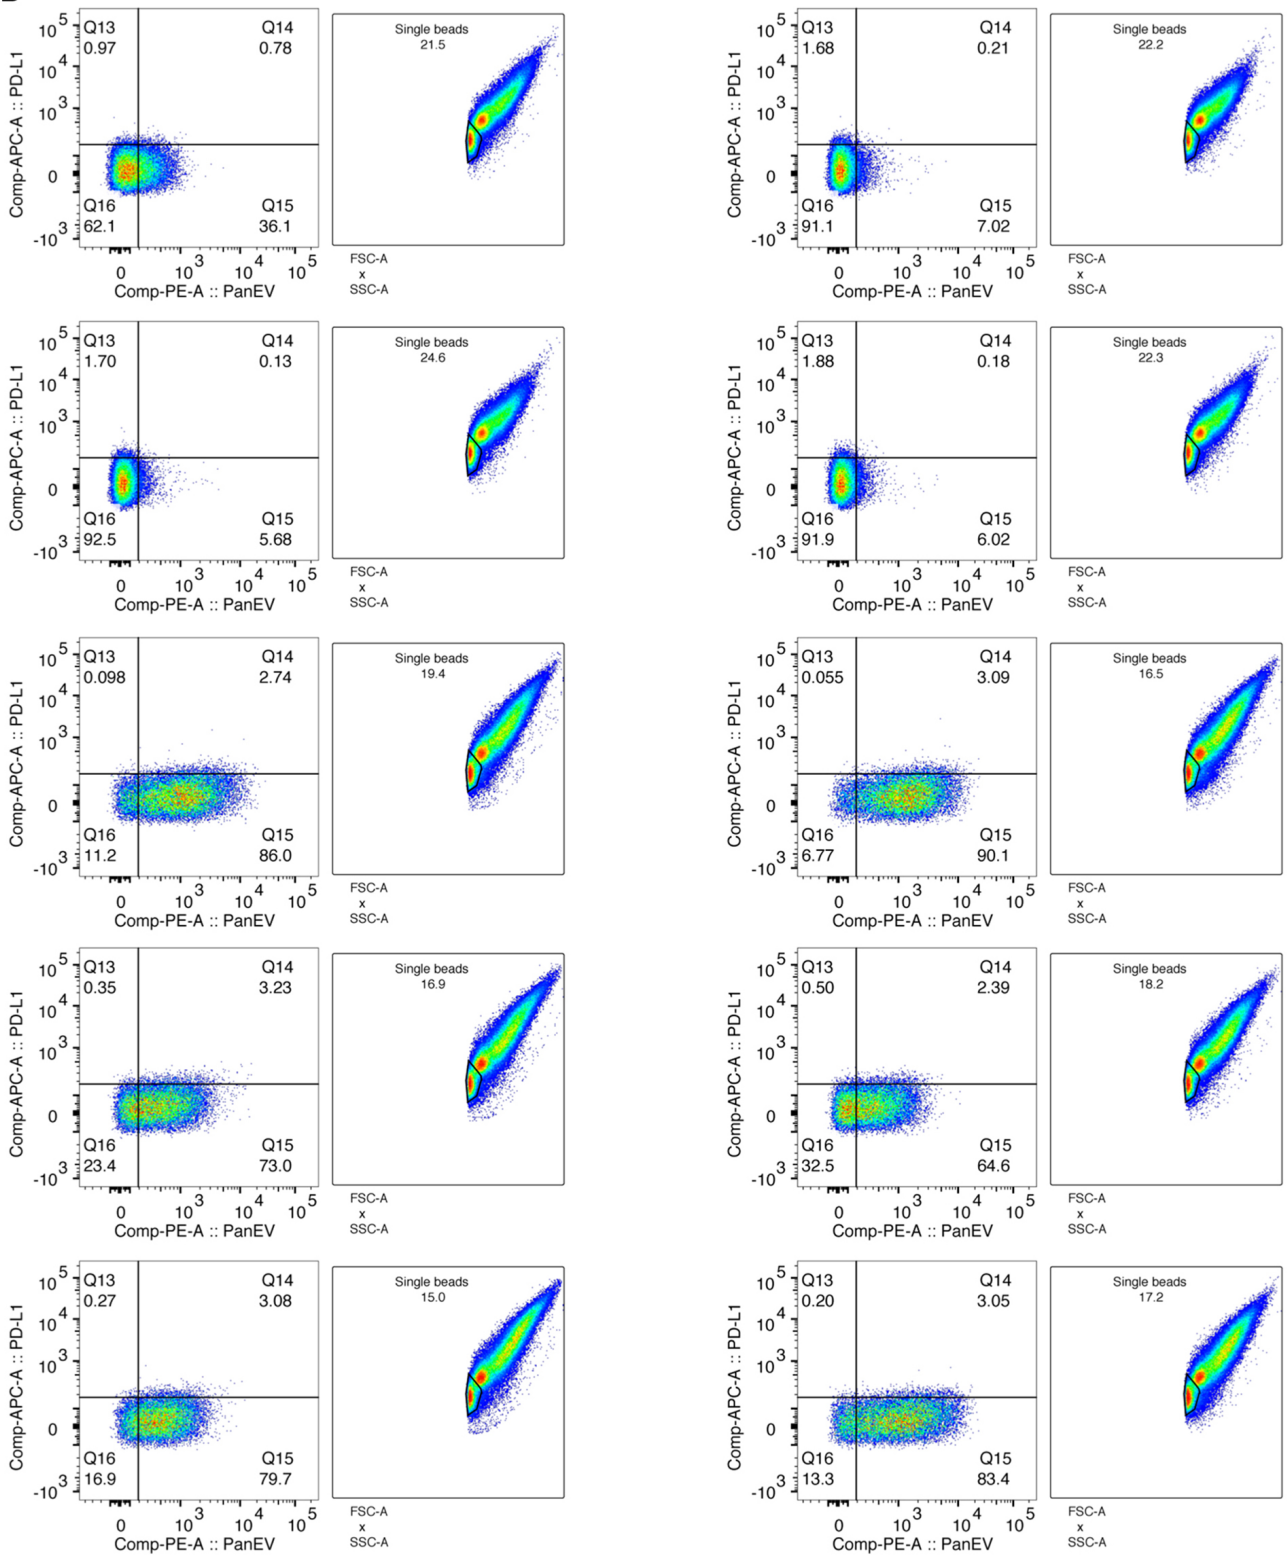

|                      |                      |
|----------------------|----------------------|
| Healthy control (19) | Healthy control (20) |
| Healthy control (23) | Healthy control (24) |
| Healthy control (C7) | Healthy control (CL) |
| HNSCC (59)           | HNSCC (60)           |
| HNSCC (63)           | HNSCC (64)           |

Figure S3. Continued.

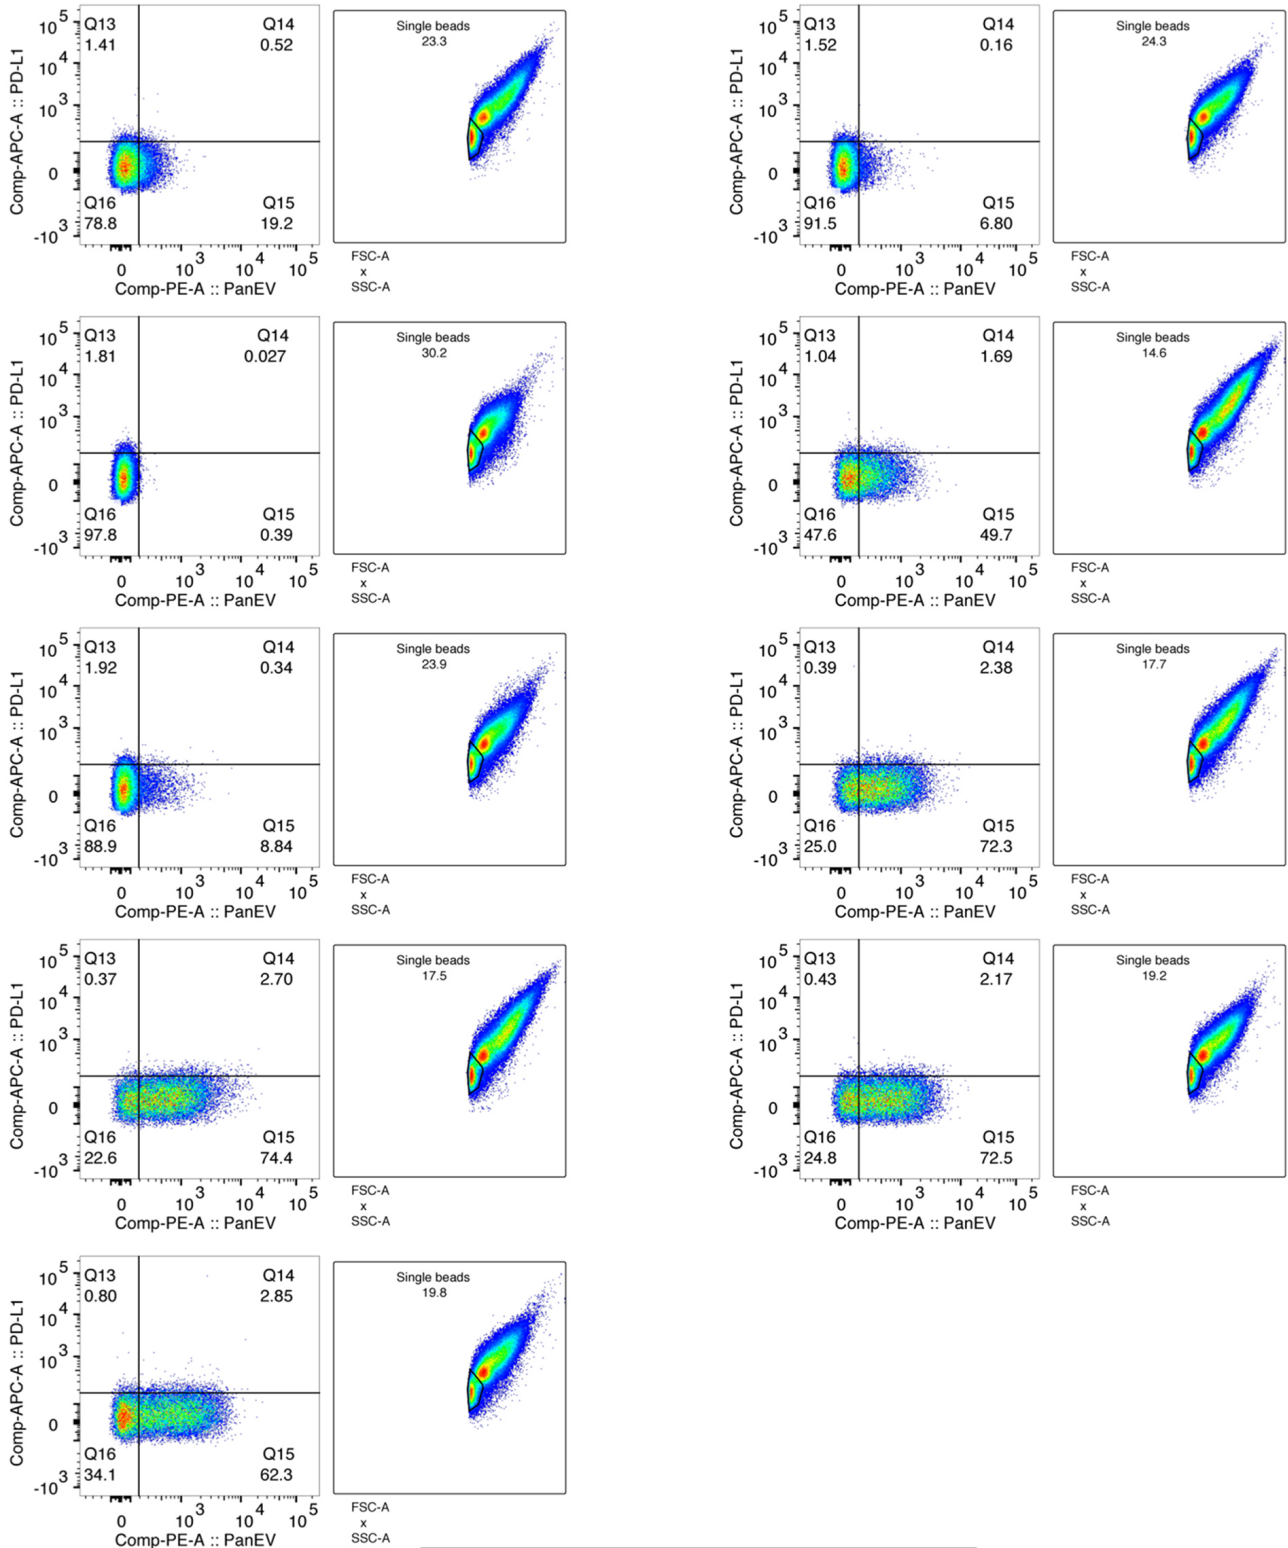

|                       |                      |
|-----------------------|----------------------|
| Healthy control (21)  | Healthy control (22) |
| EF (Negative control) | Healthy control (C6) |
| HNSCC (52)            | HNSCC (55)           |
| HNSCC (61)            | HNSCC (62)           |
| HNSCC (65)            |                      |



Figure S3. Continued.

**E**

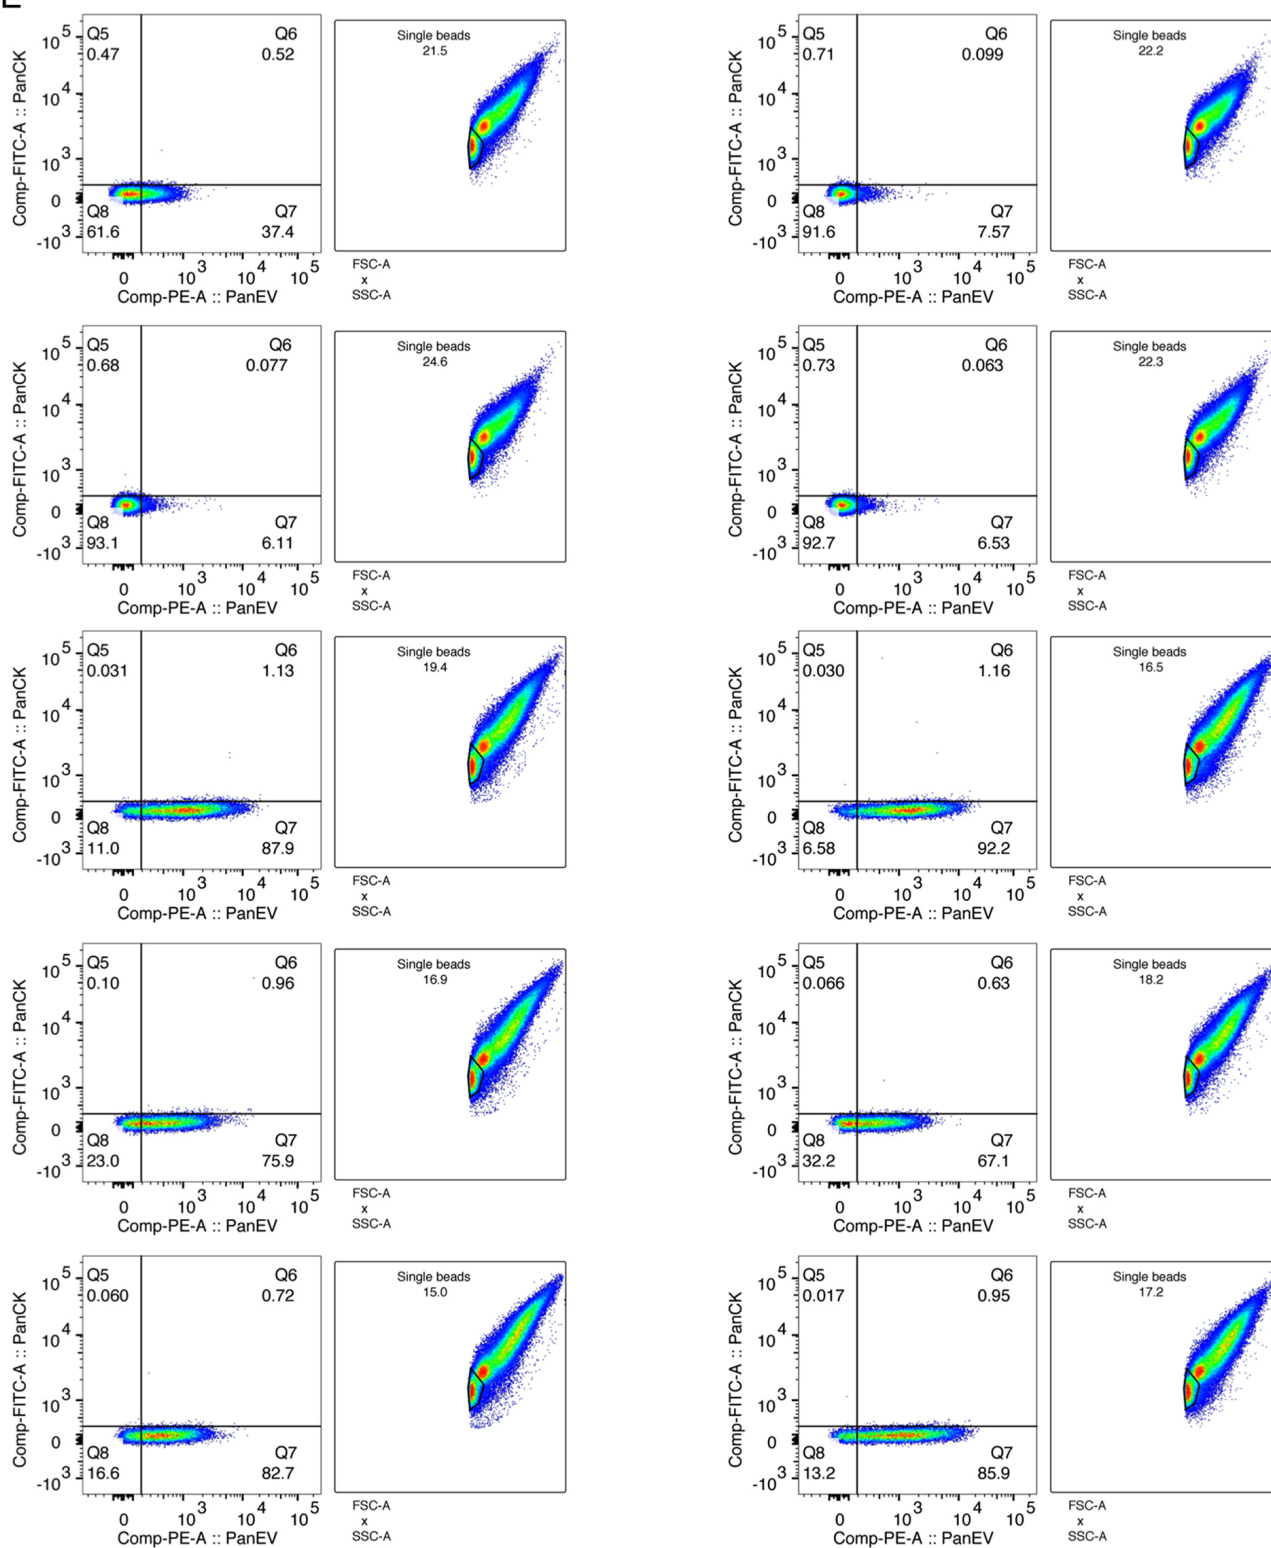

|                      |                      |
|----------------------|----------------------|
| Healthy control (19) | Healthy control (20) |
| Healthy control (23) | Healthy control (24) |
| Healthy control (C7) | Healthy control (CL) |
| HNSCC (59)           | HNSCC (60)           |
| HNSCC (63)           | HNSCC (64)           |

Figure S3. Continued.

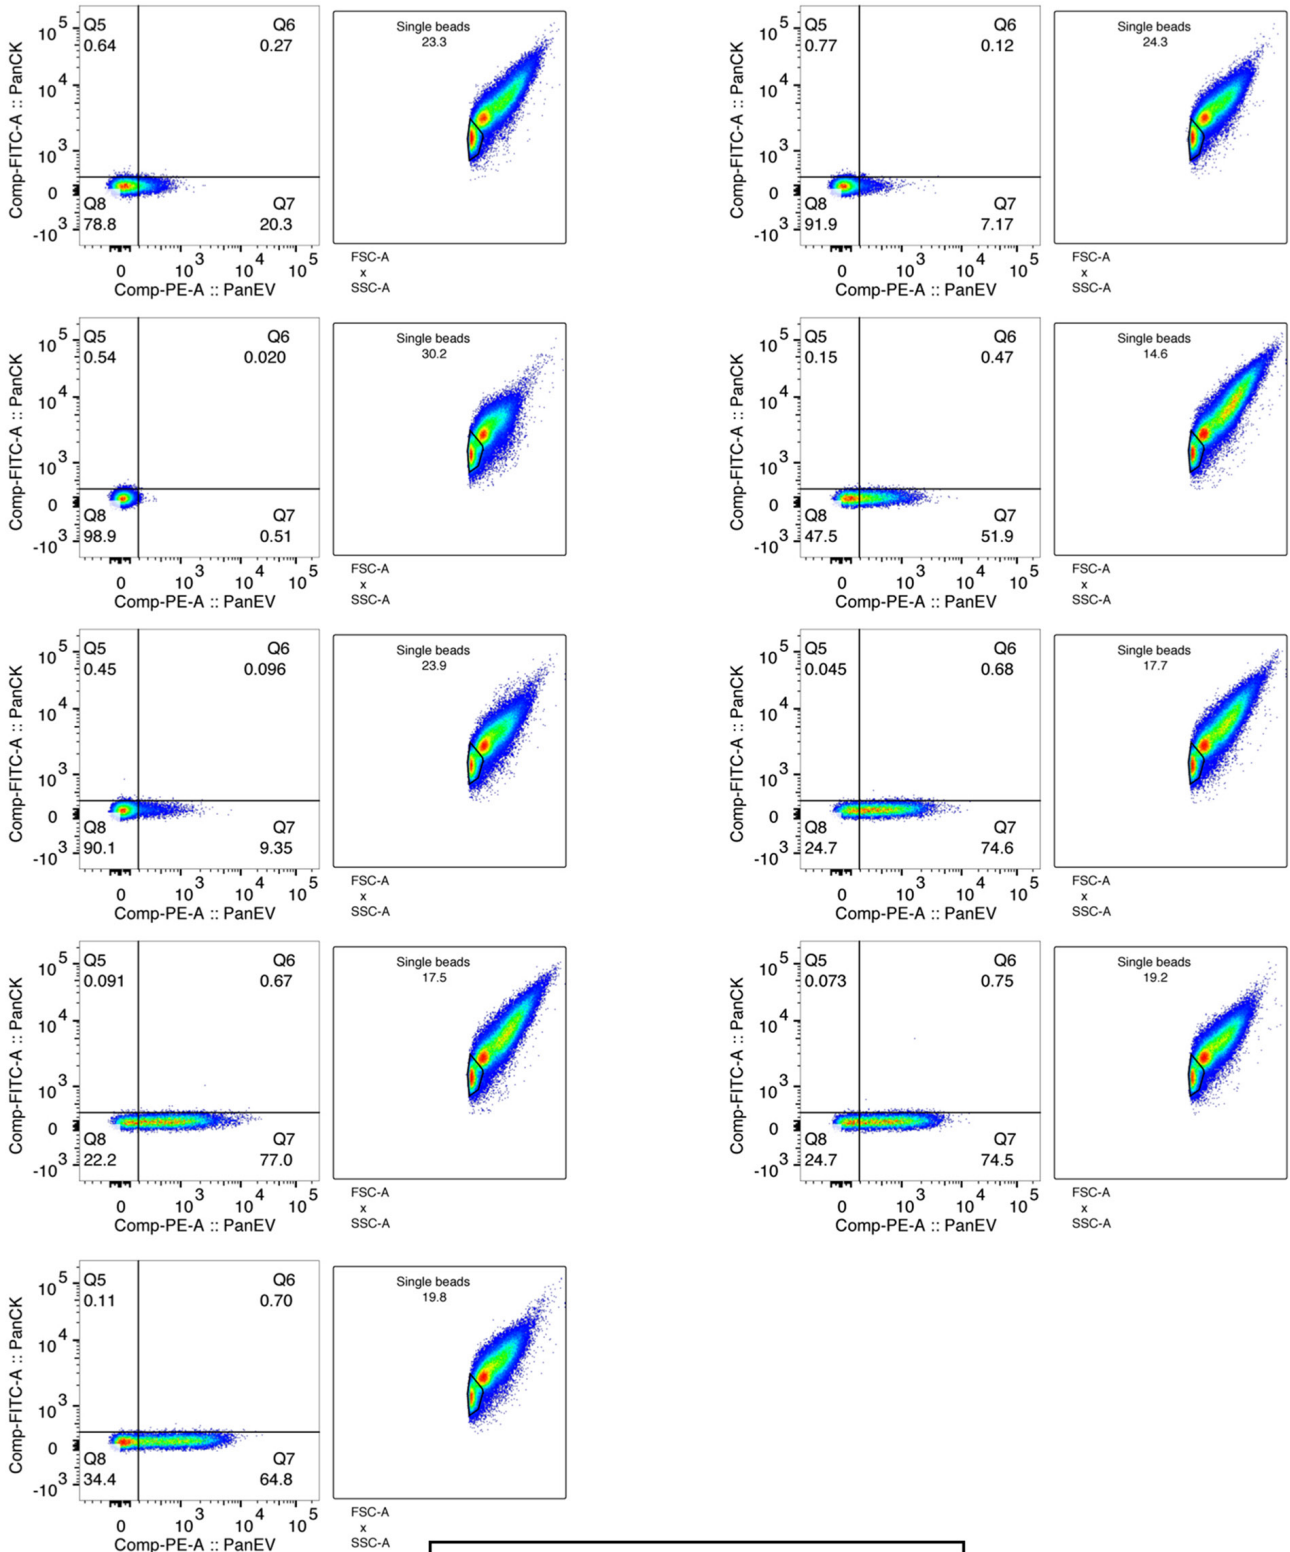

|                       |                      |
|-----------------------|----------------------|
| Healthy control (21)  | Healthy control (22) |
| EF (Negative control) | Healthy control (C6) |
| HNSCC (52)            | HNSCC (55)           |
| HNSCC (61)            | HNSCC (62)           |
| HNSCC (65)            |                      |

Figure S3. Continued.

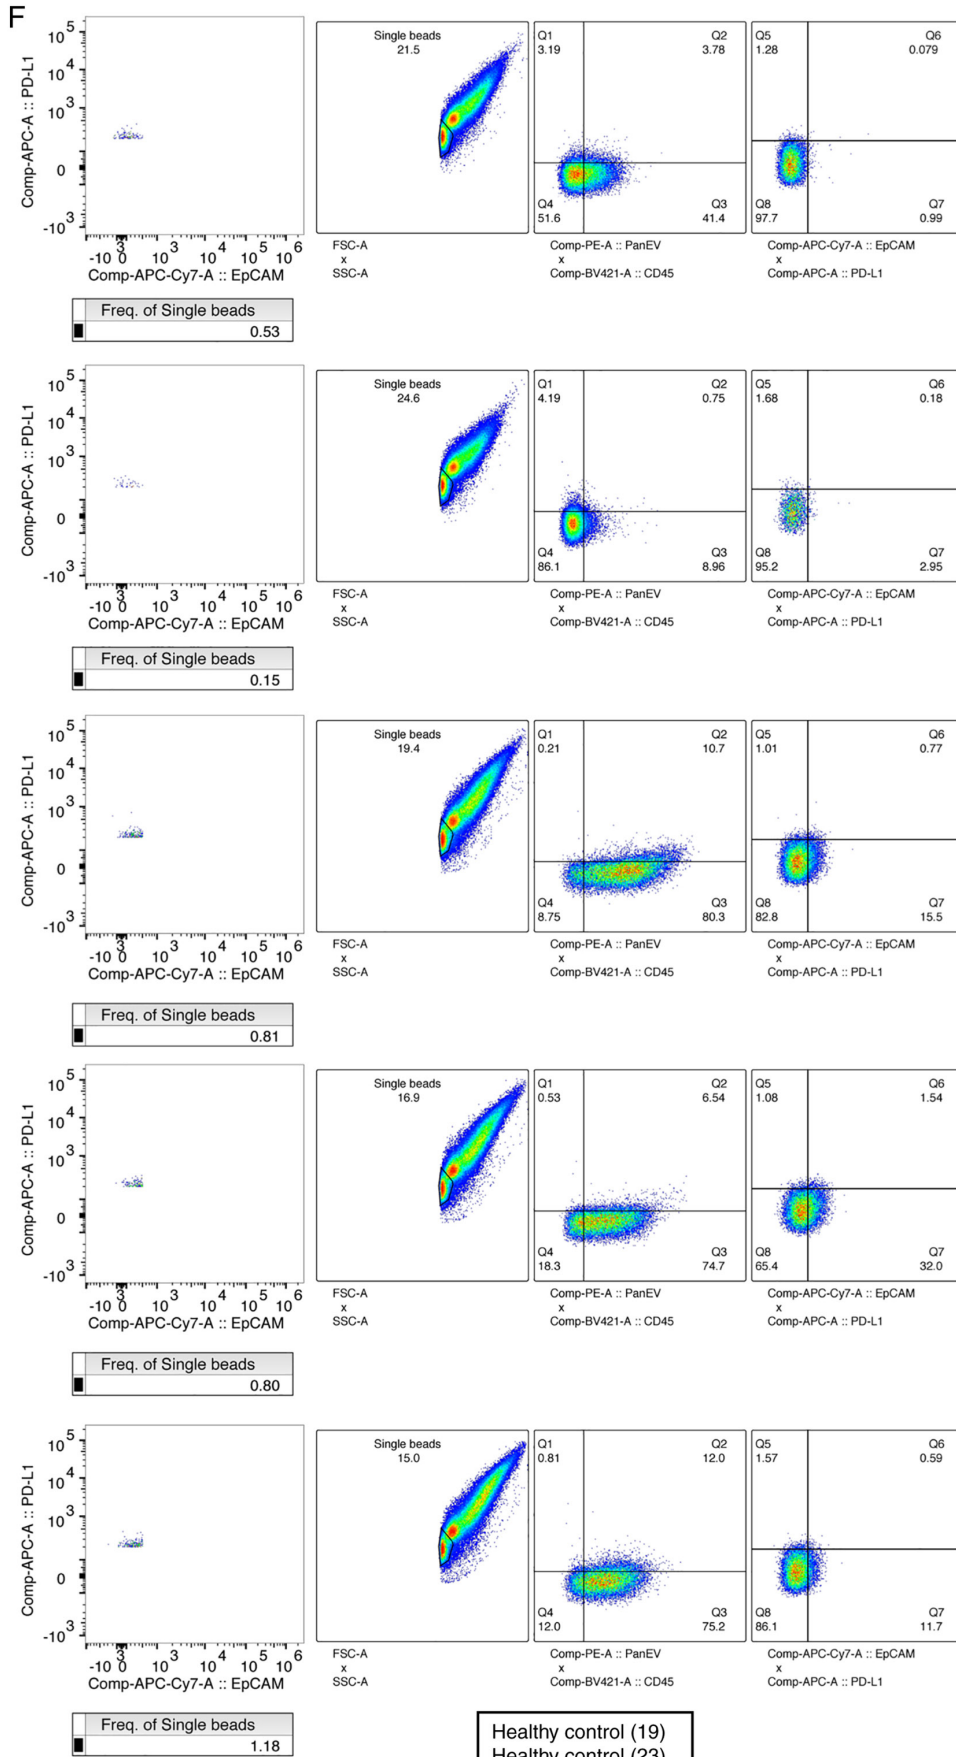

Healthy control (19)  
 Healthy control (23)  
 Healthy control (C7)  
 HNSCC (59)  
 HNSCC (63)

Figure S3. Continued.

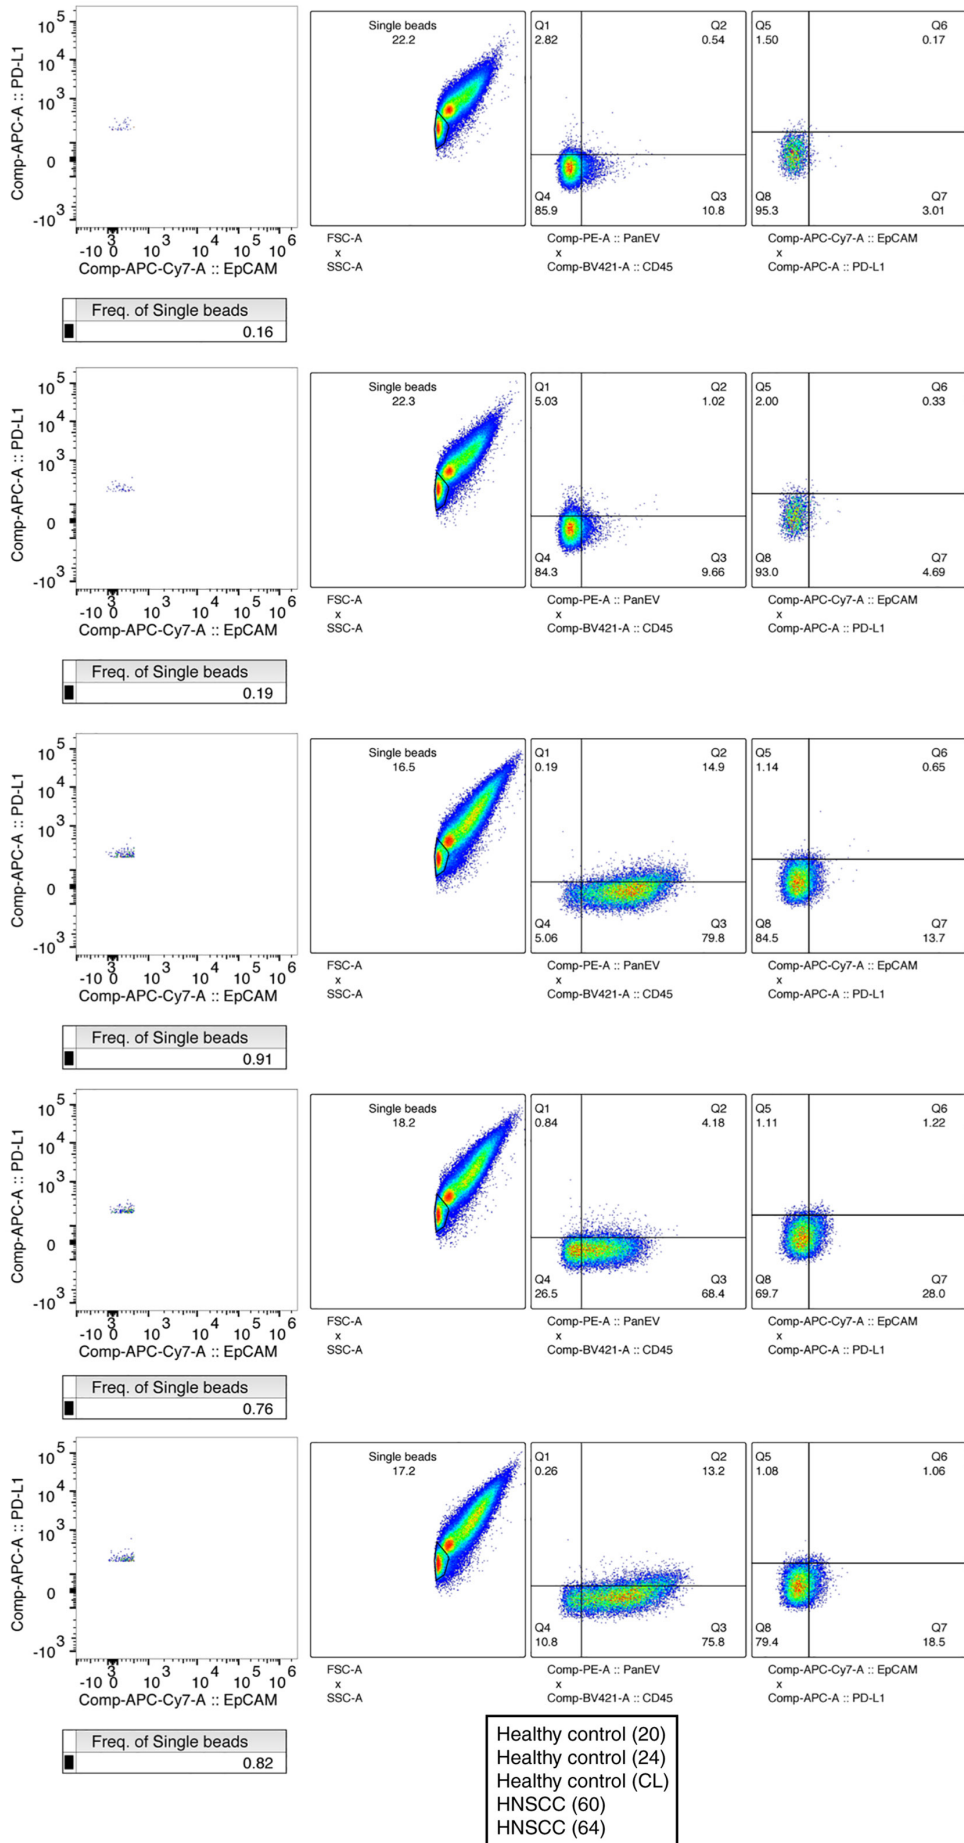



Figure S3. Continued.

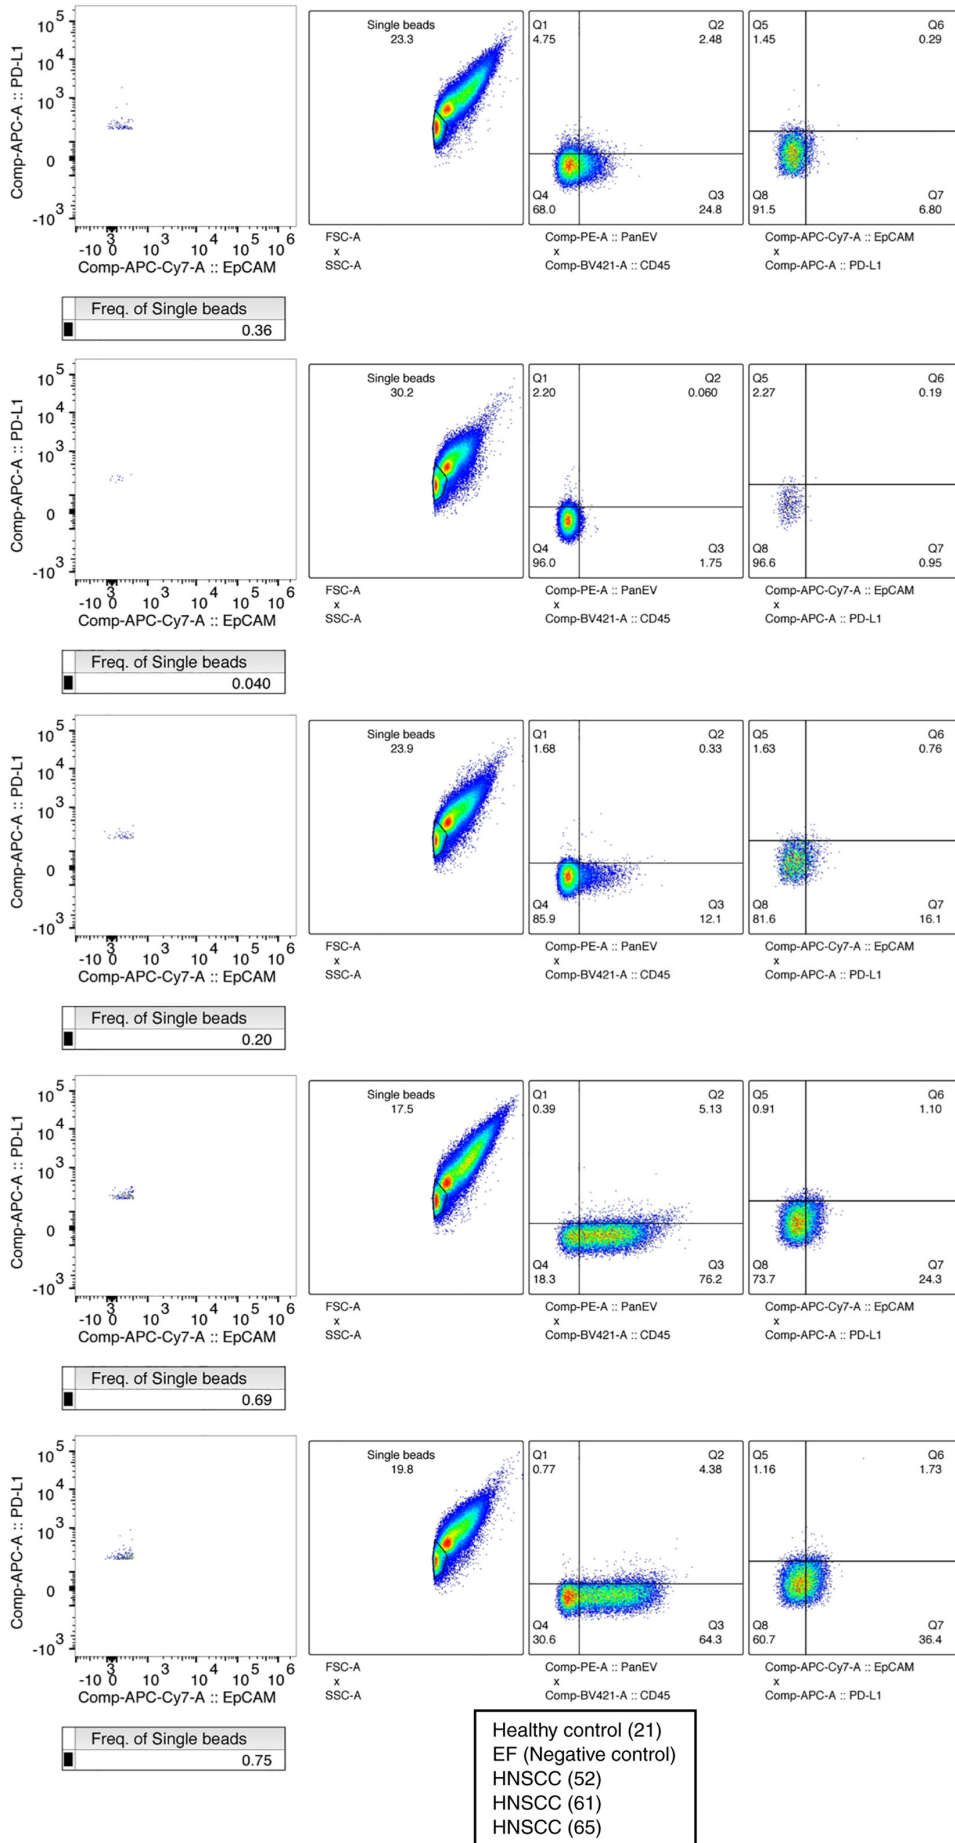

Healthy control (21)  
 EF (Negative control)  
 HNSCC (52)  
 HNSCC (61)  
 HNSCC (65)

Figure S3. Continued.

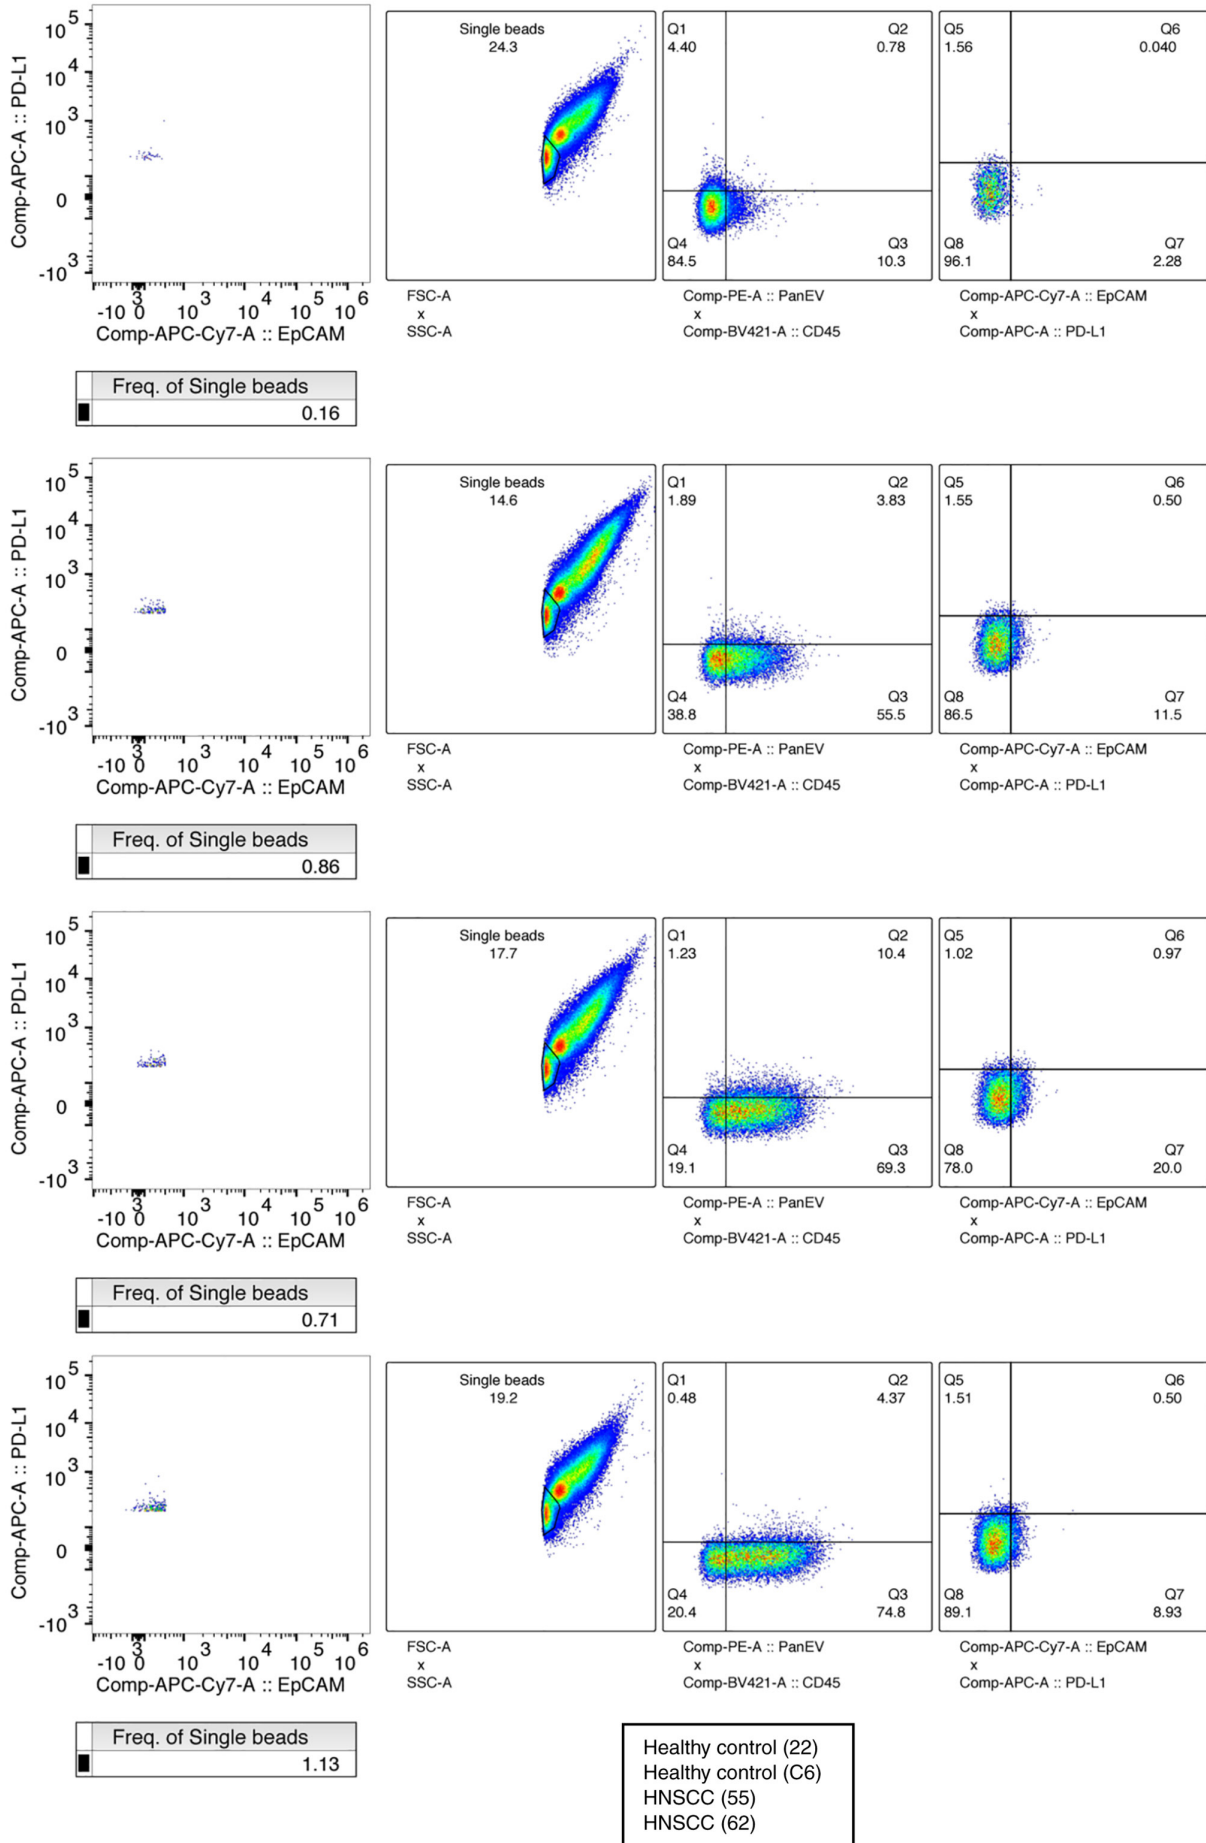

Figure S3. Continued.

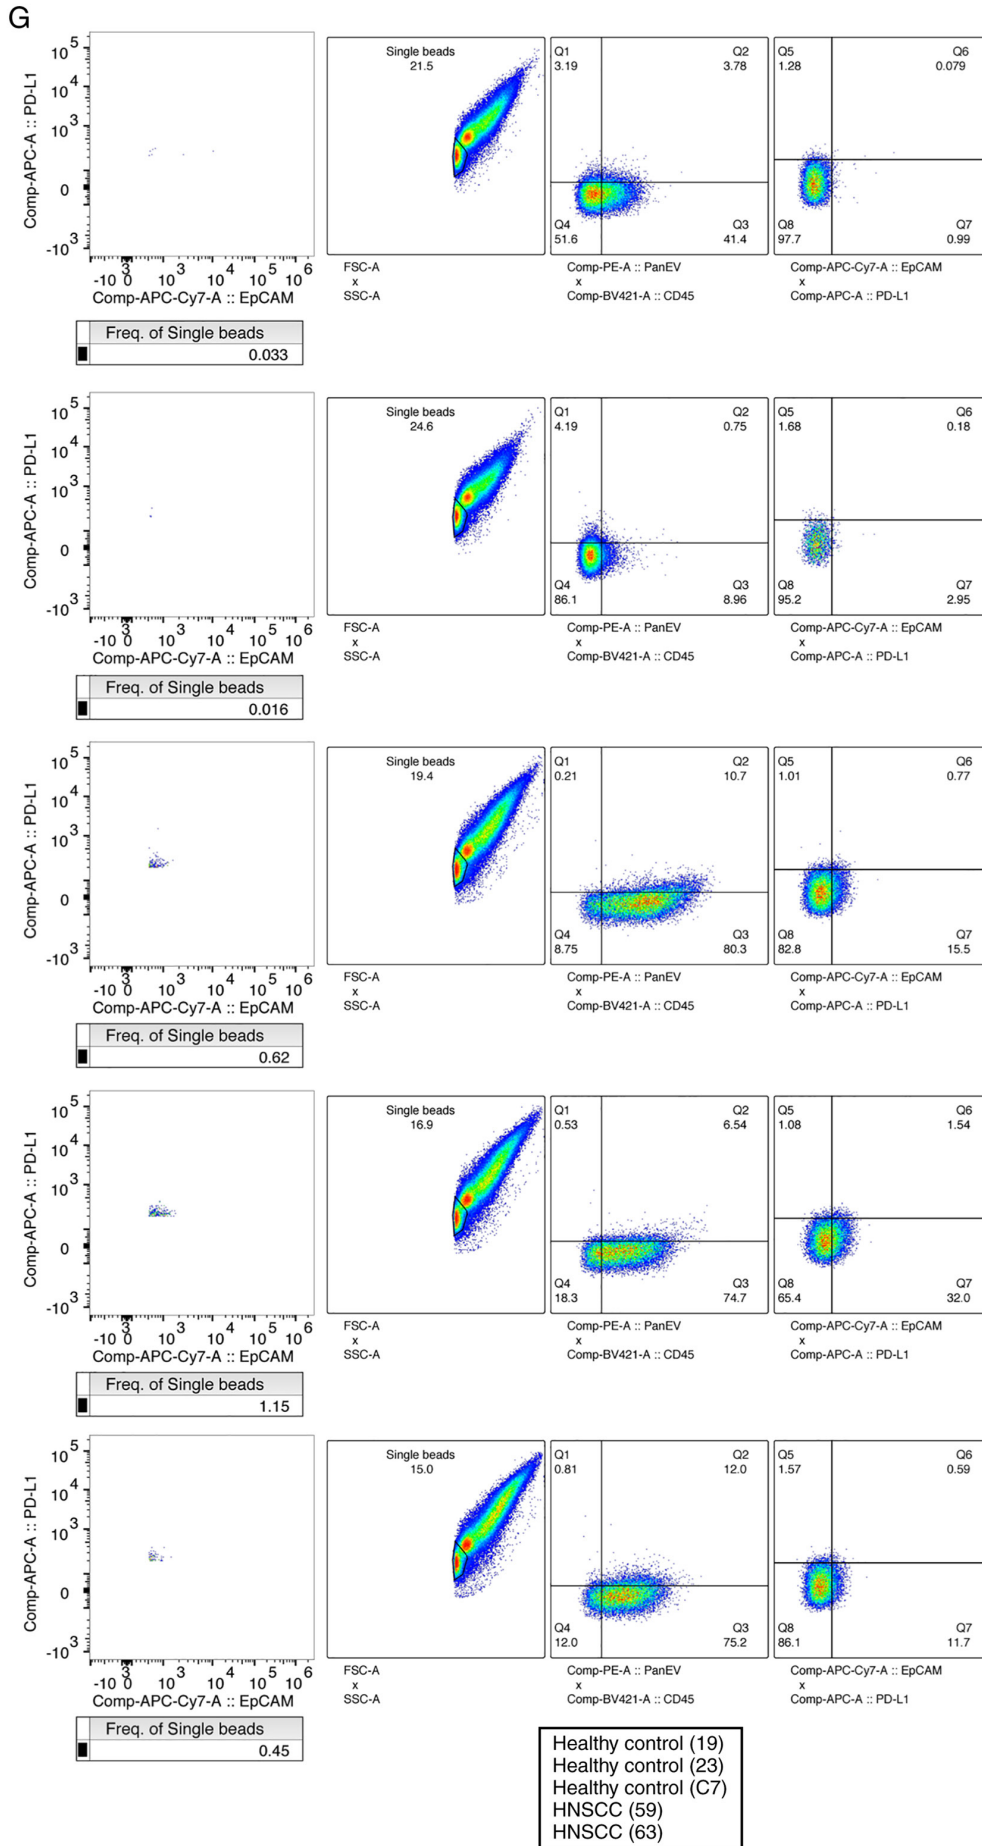

Figure S3. Continued.

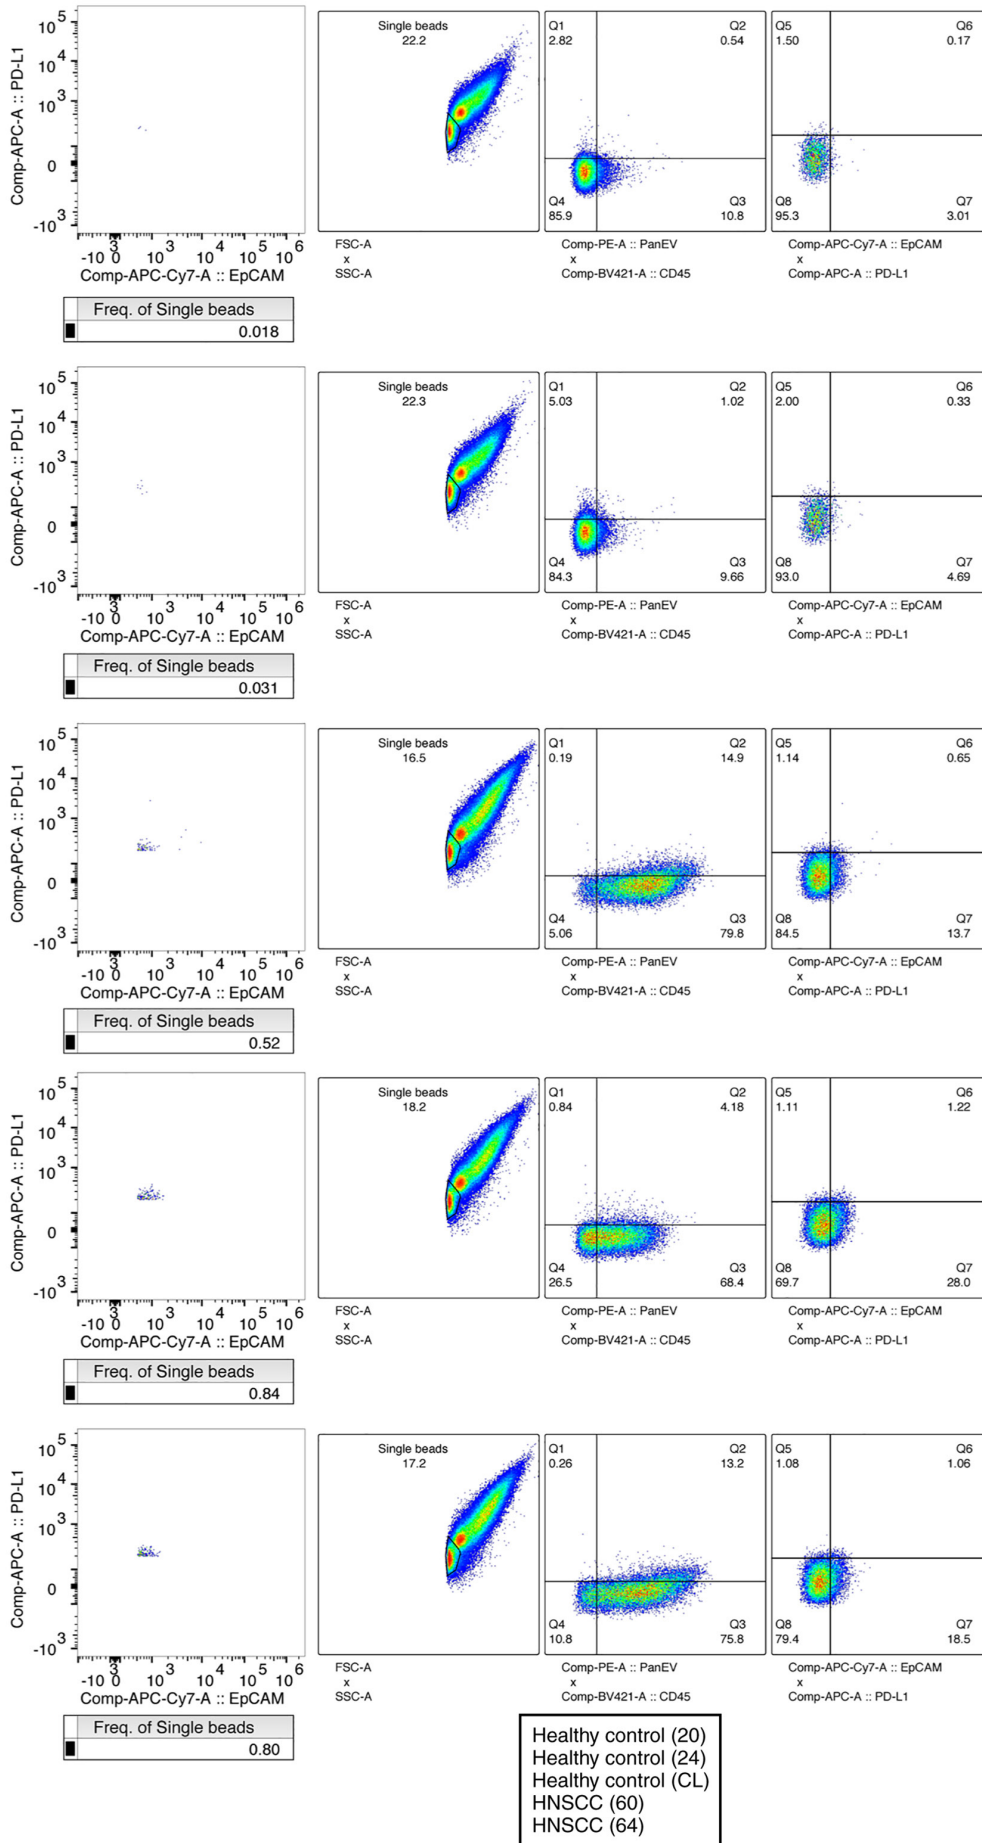

Figure S3. Continued.

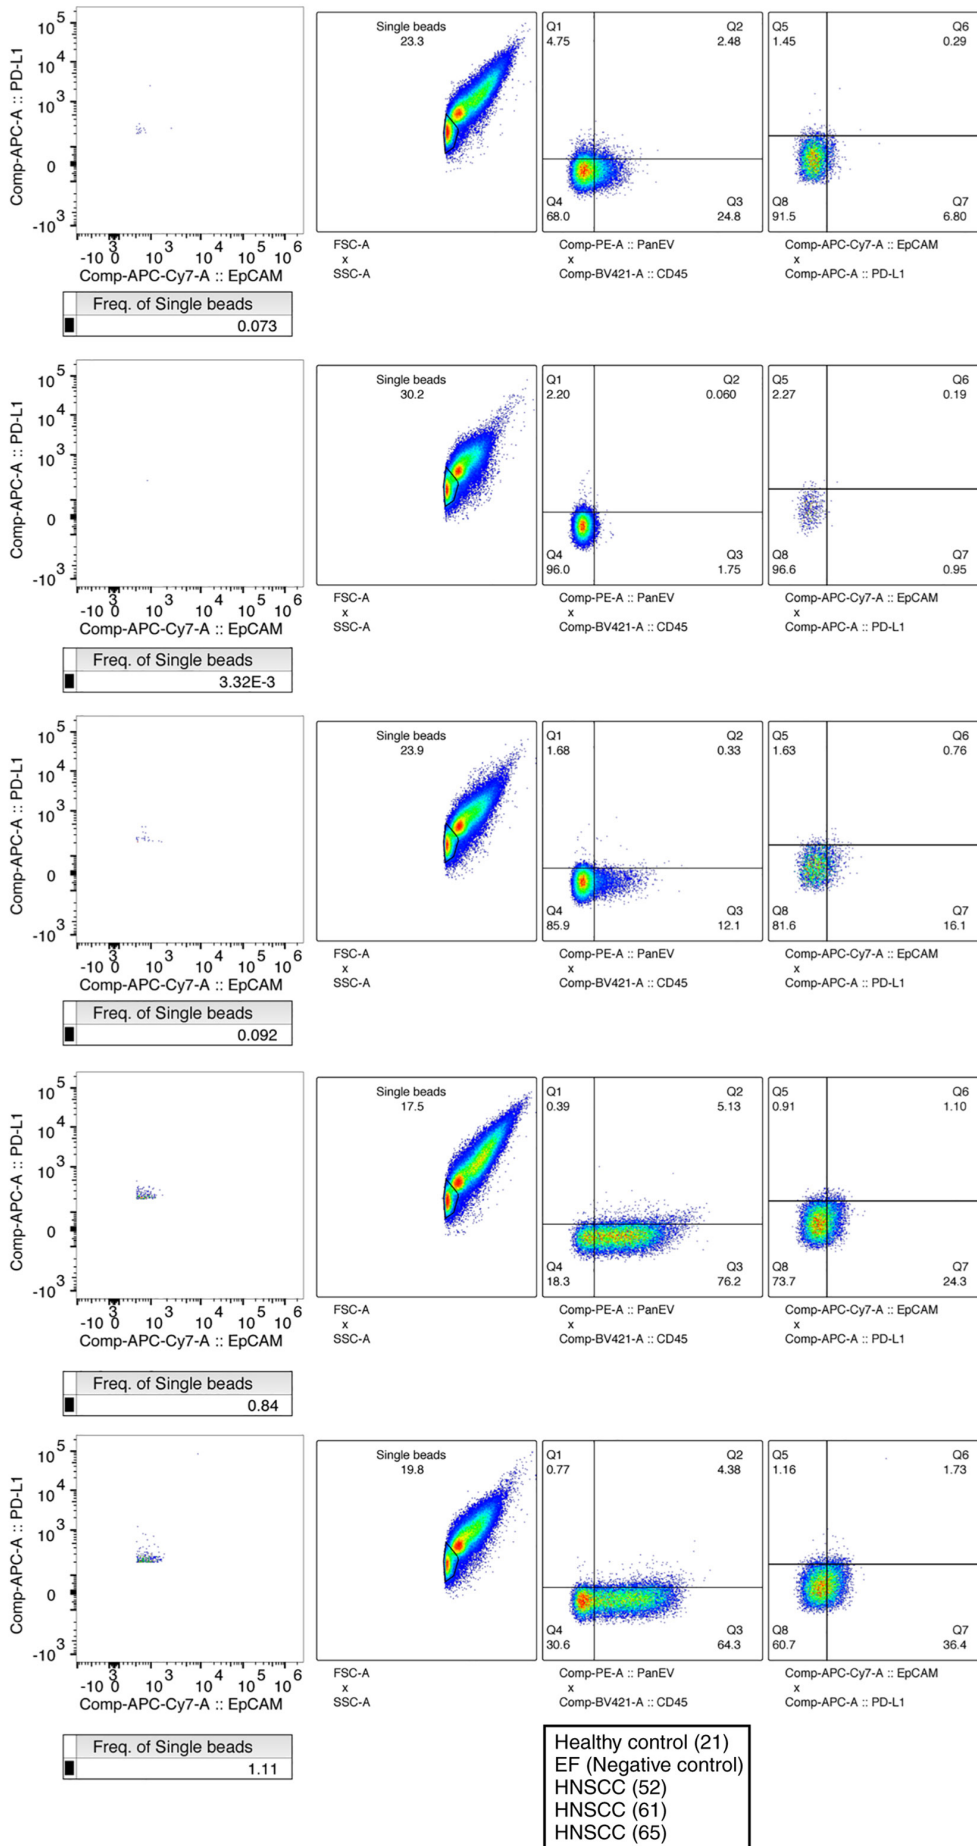



Figure S3. Continued.

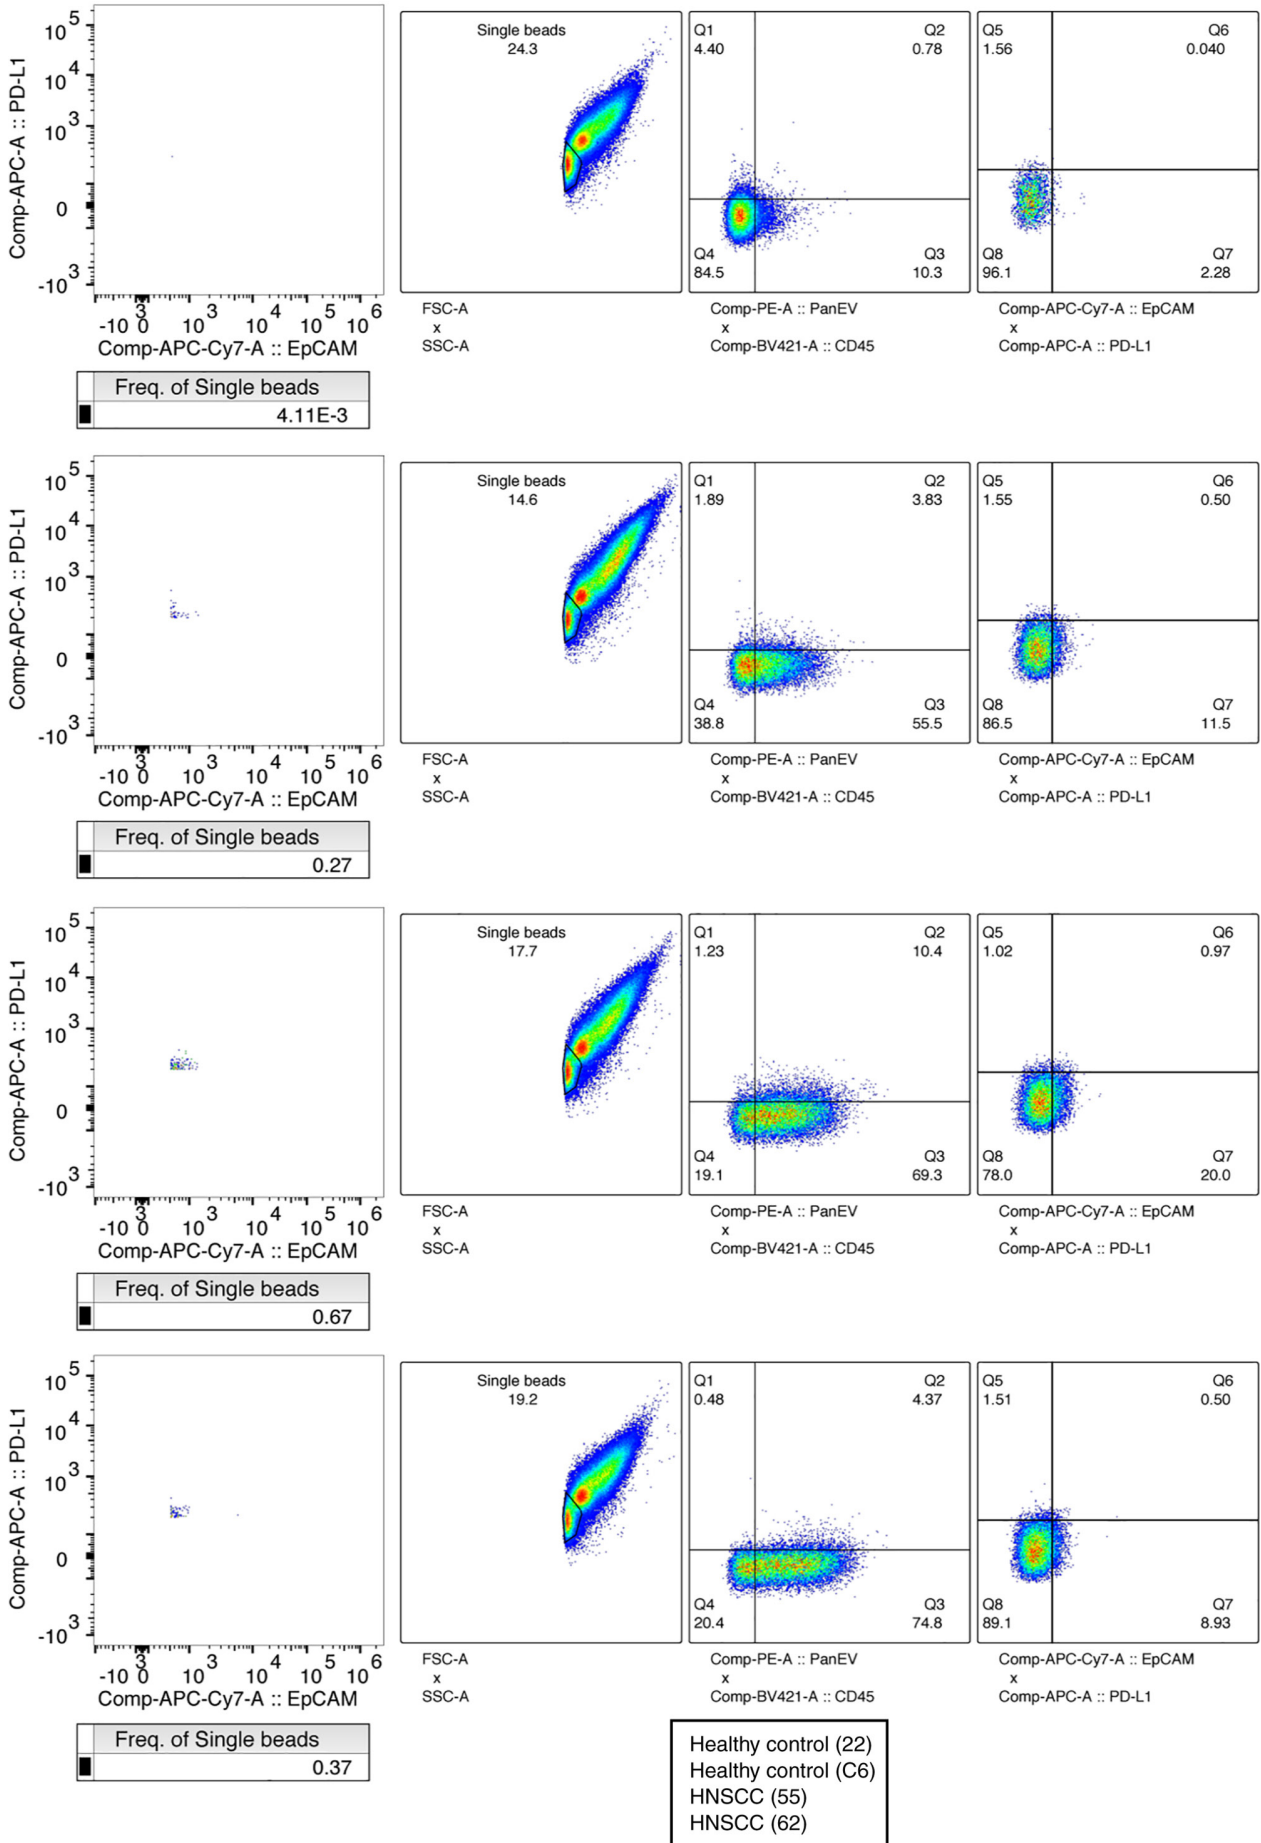

Figure S3. Continued.

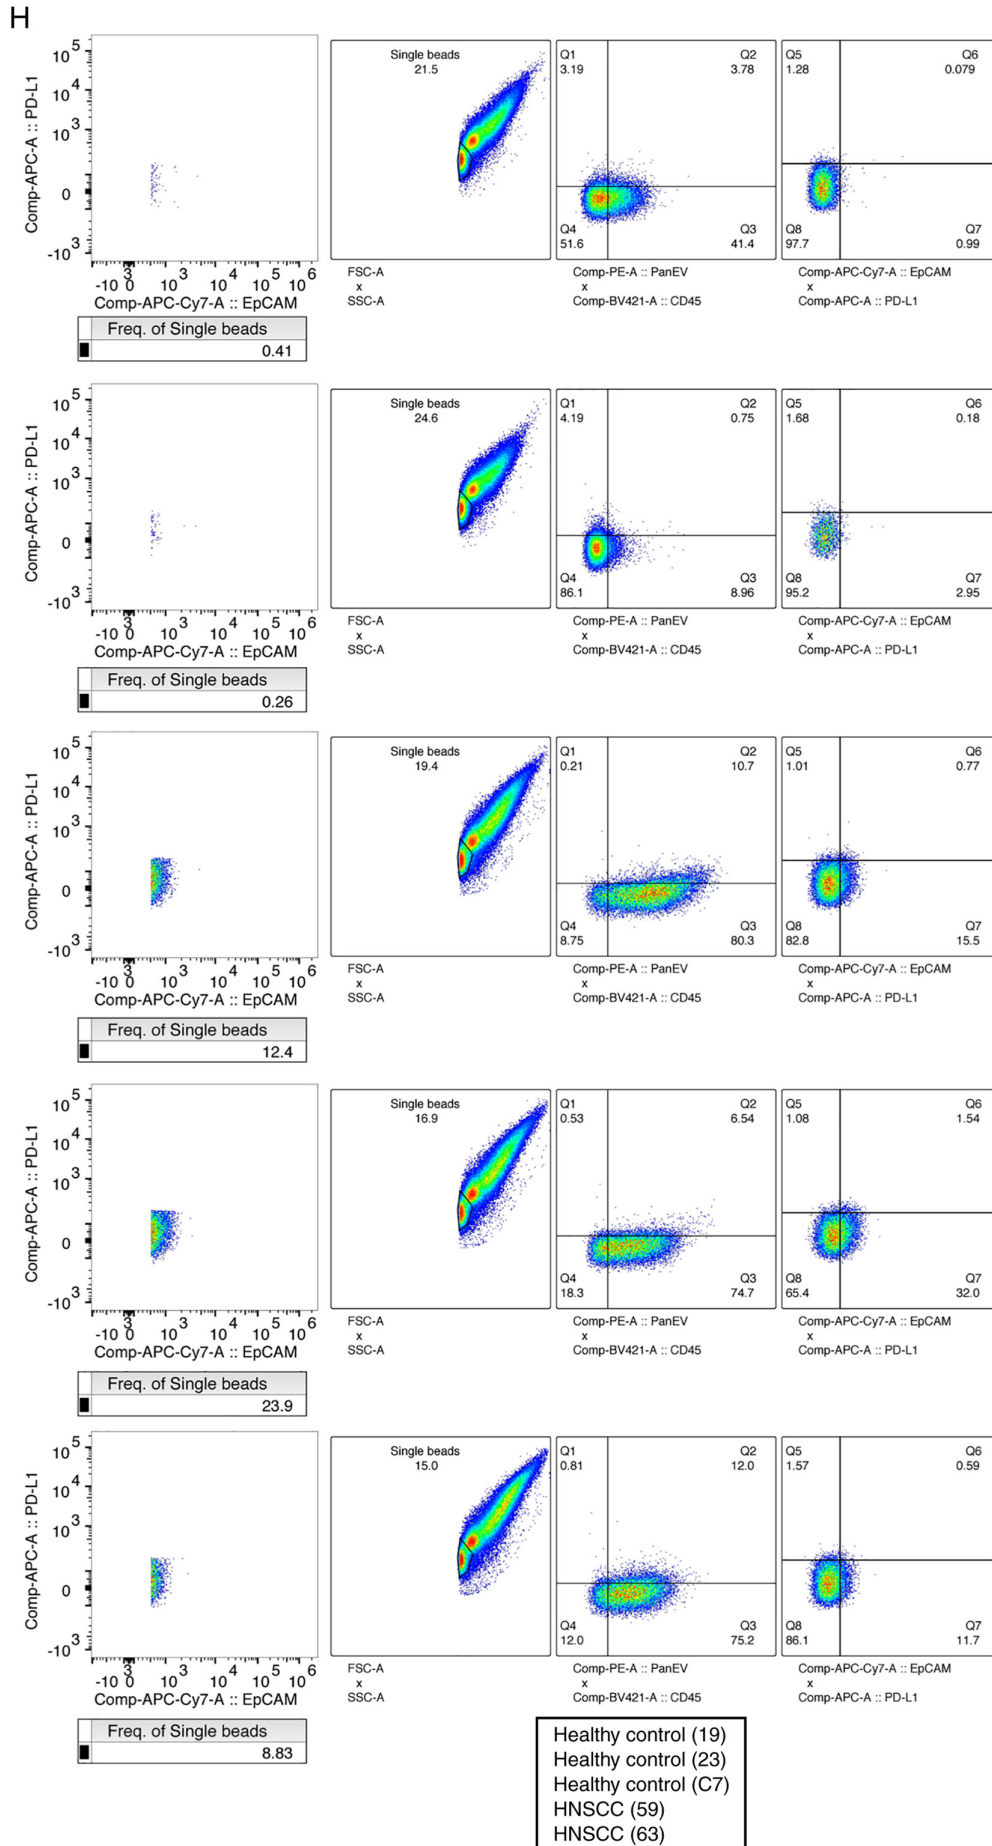

Figure S3. Continued.

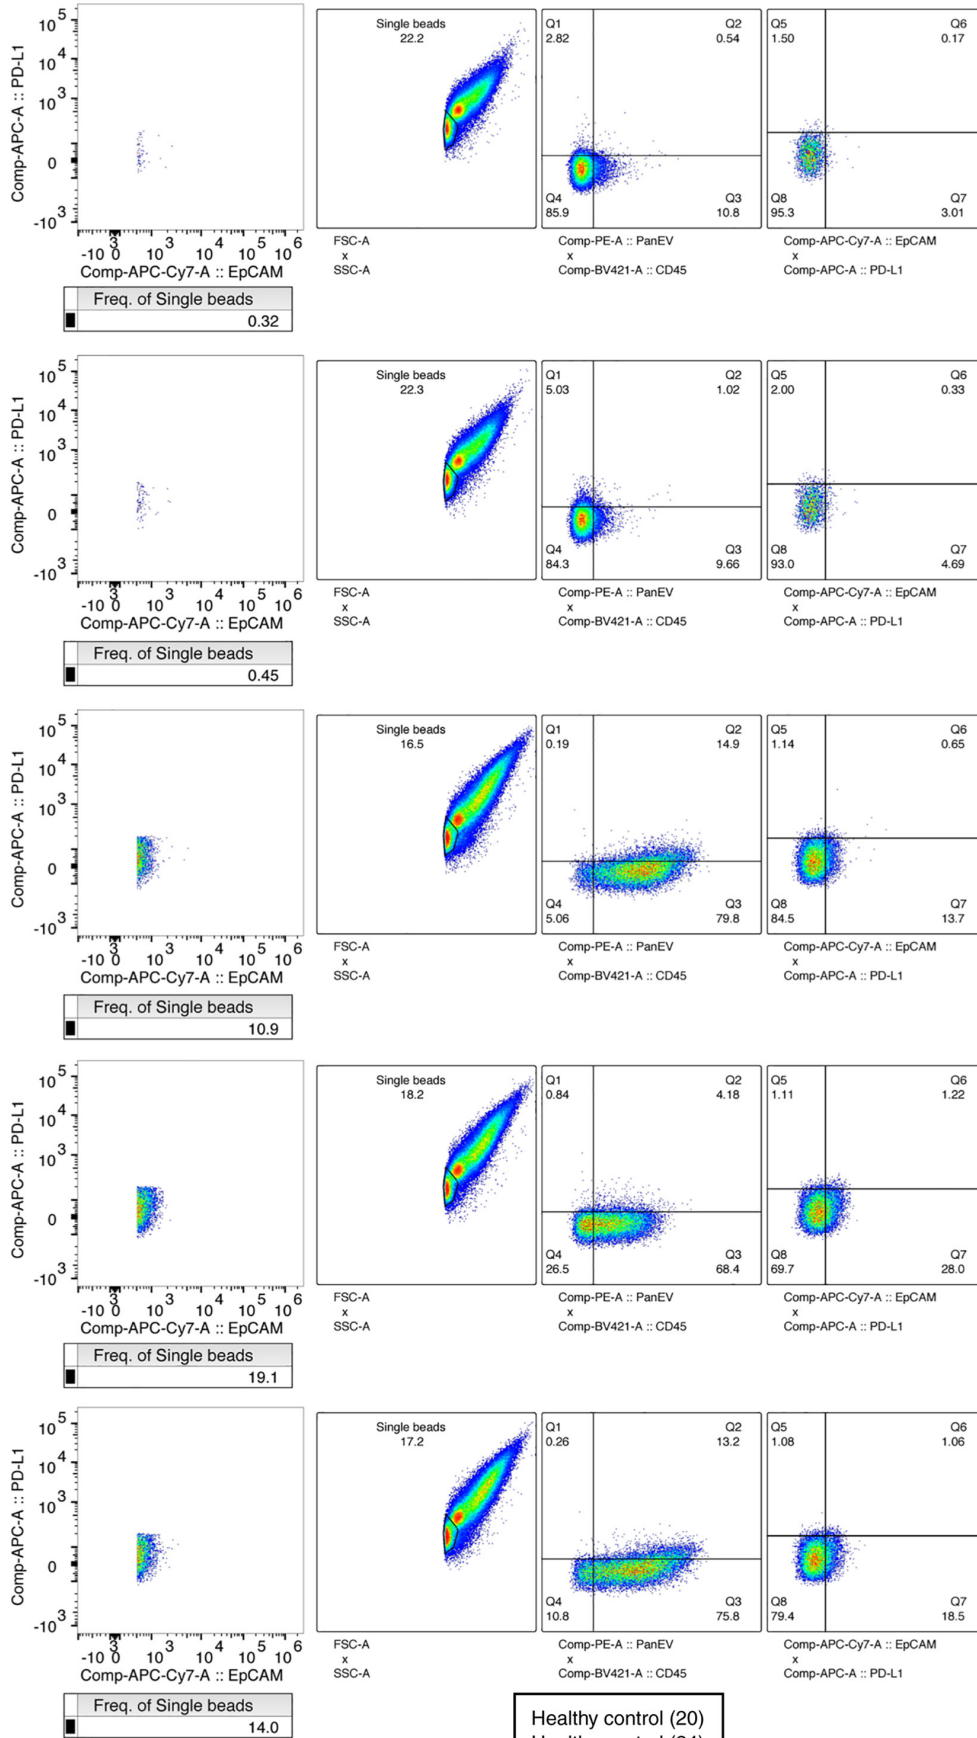

Healthy control (20)  
 Healthy control (24)  
 Healthy control (CL)  
 HNSCC (60)  
 HNSCC (64)

Figure S3. Continued.

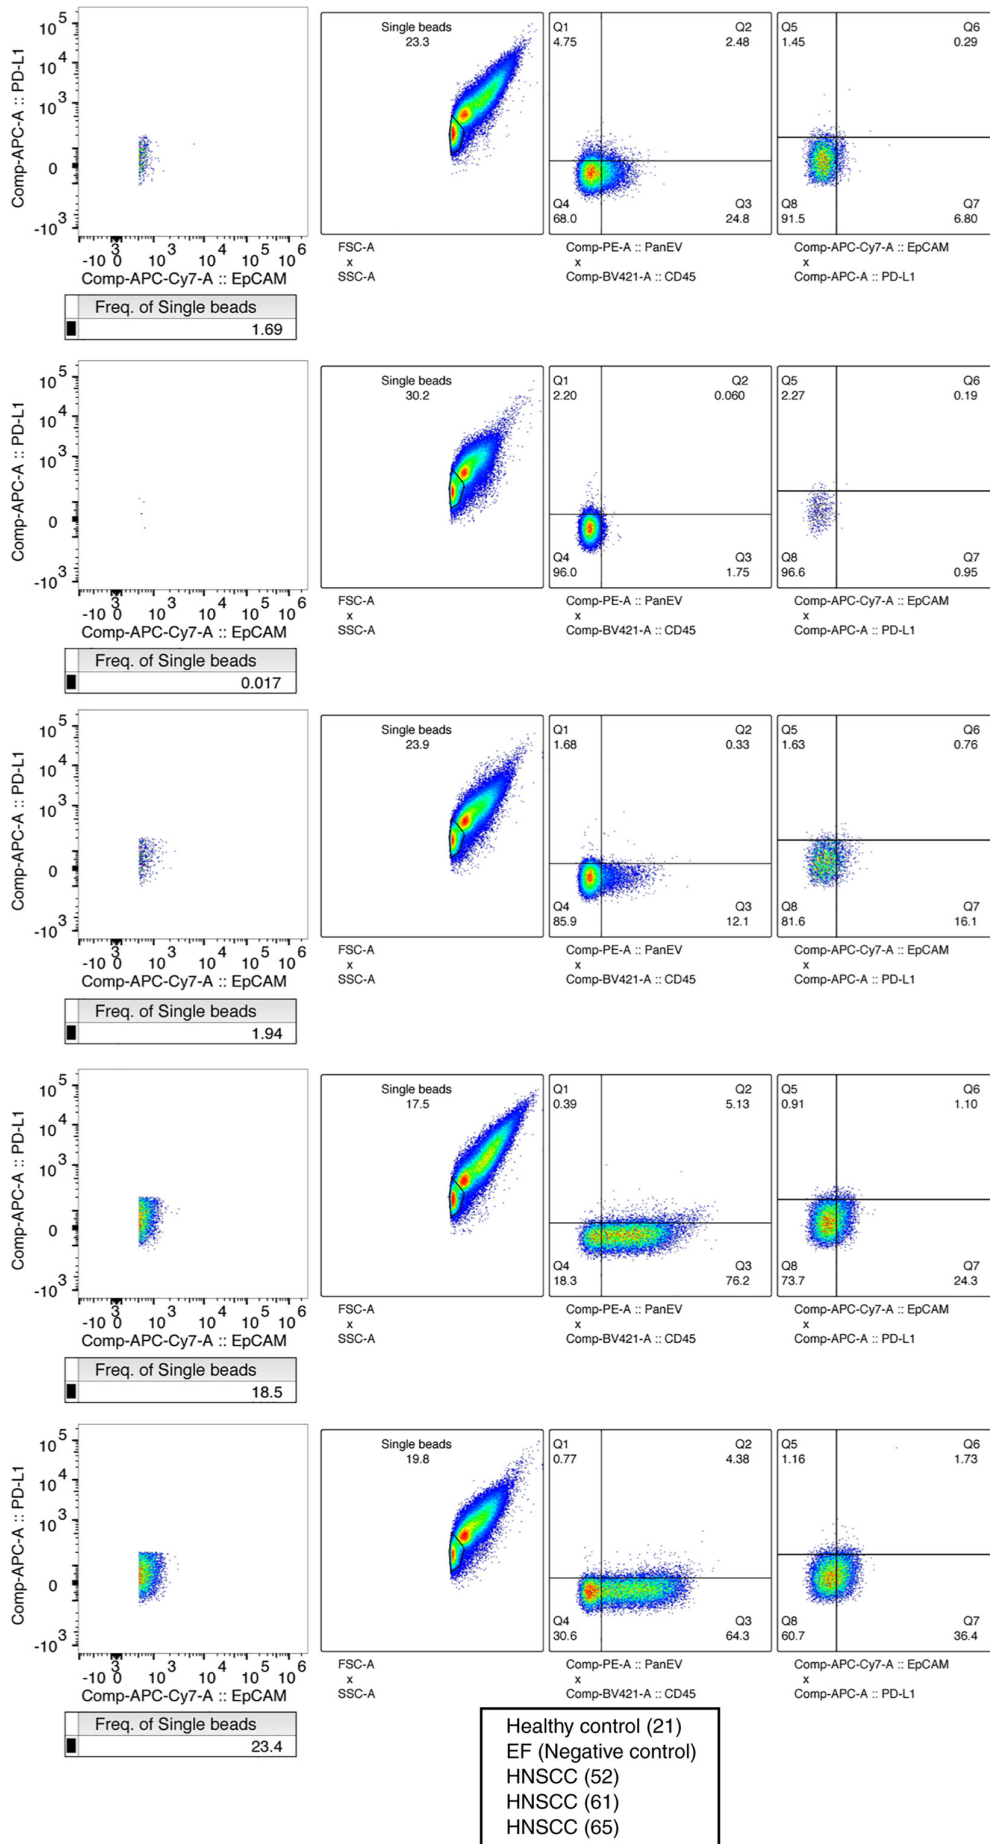

Figure S3. Continued.

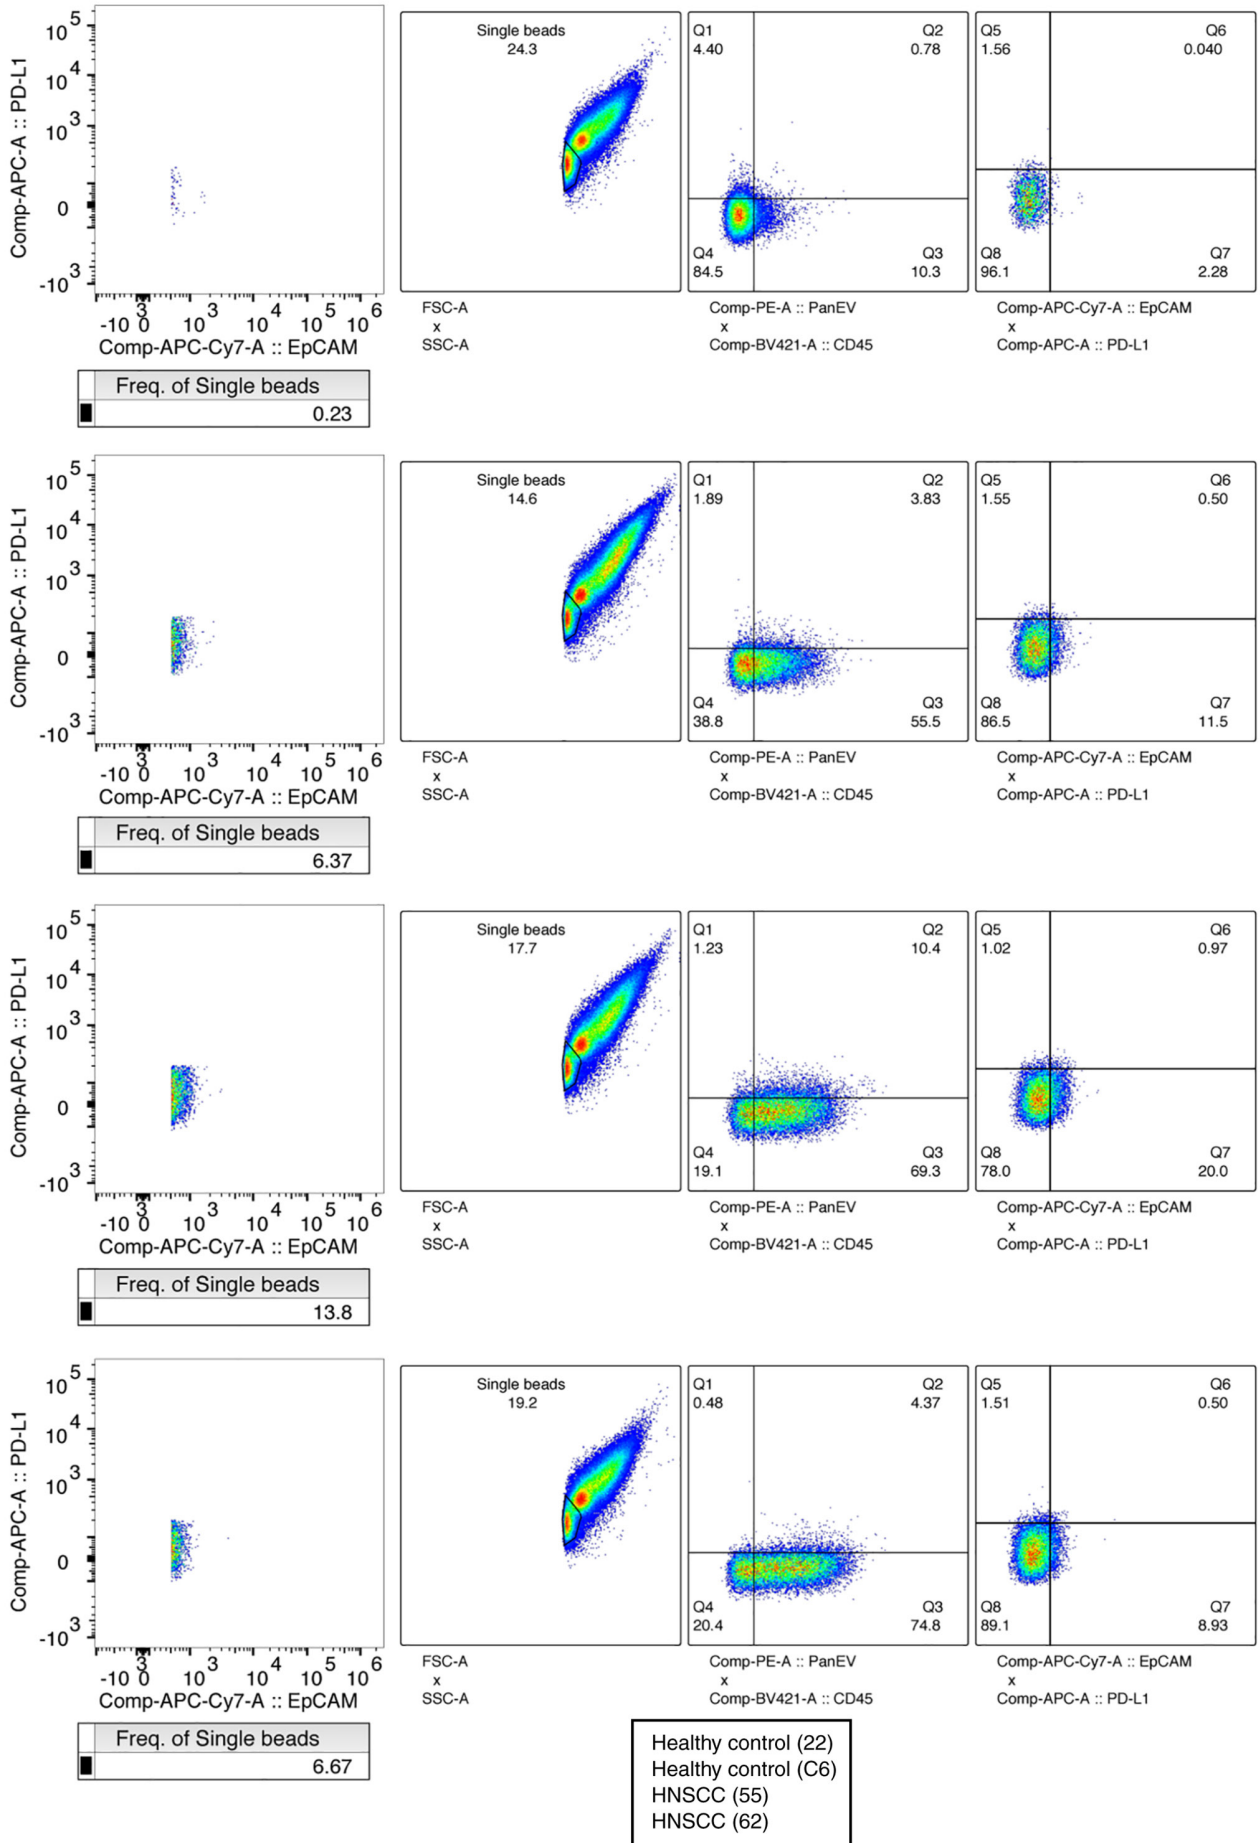



Figure S3. Continued.

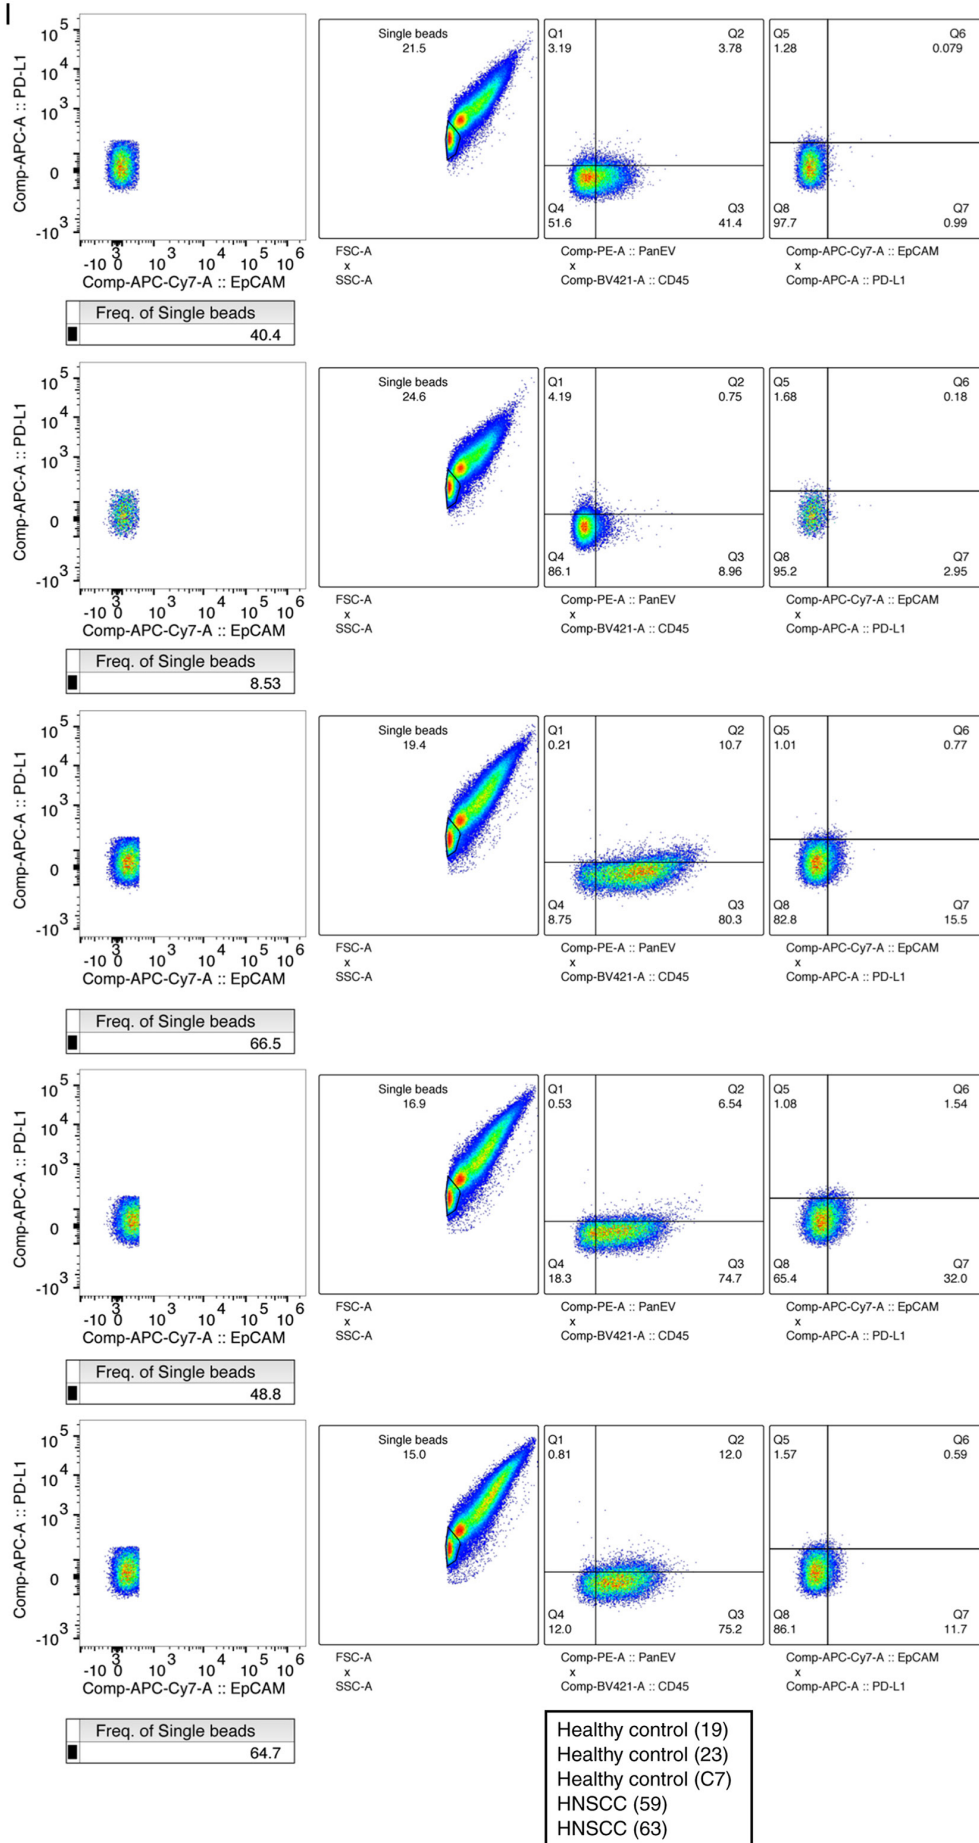

Figure S3. Continued.

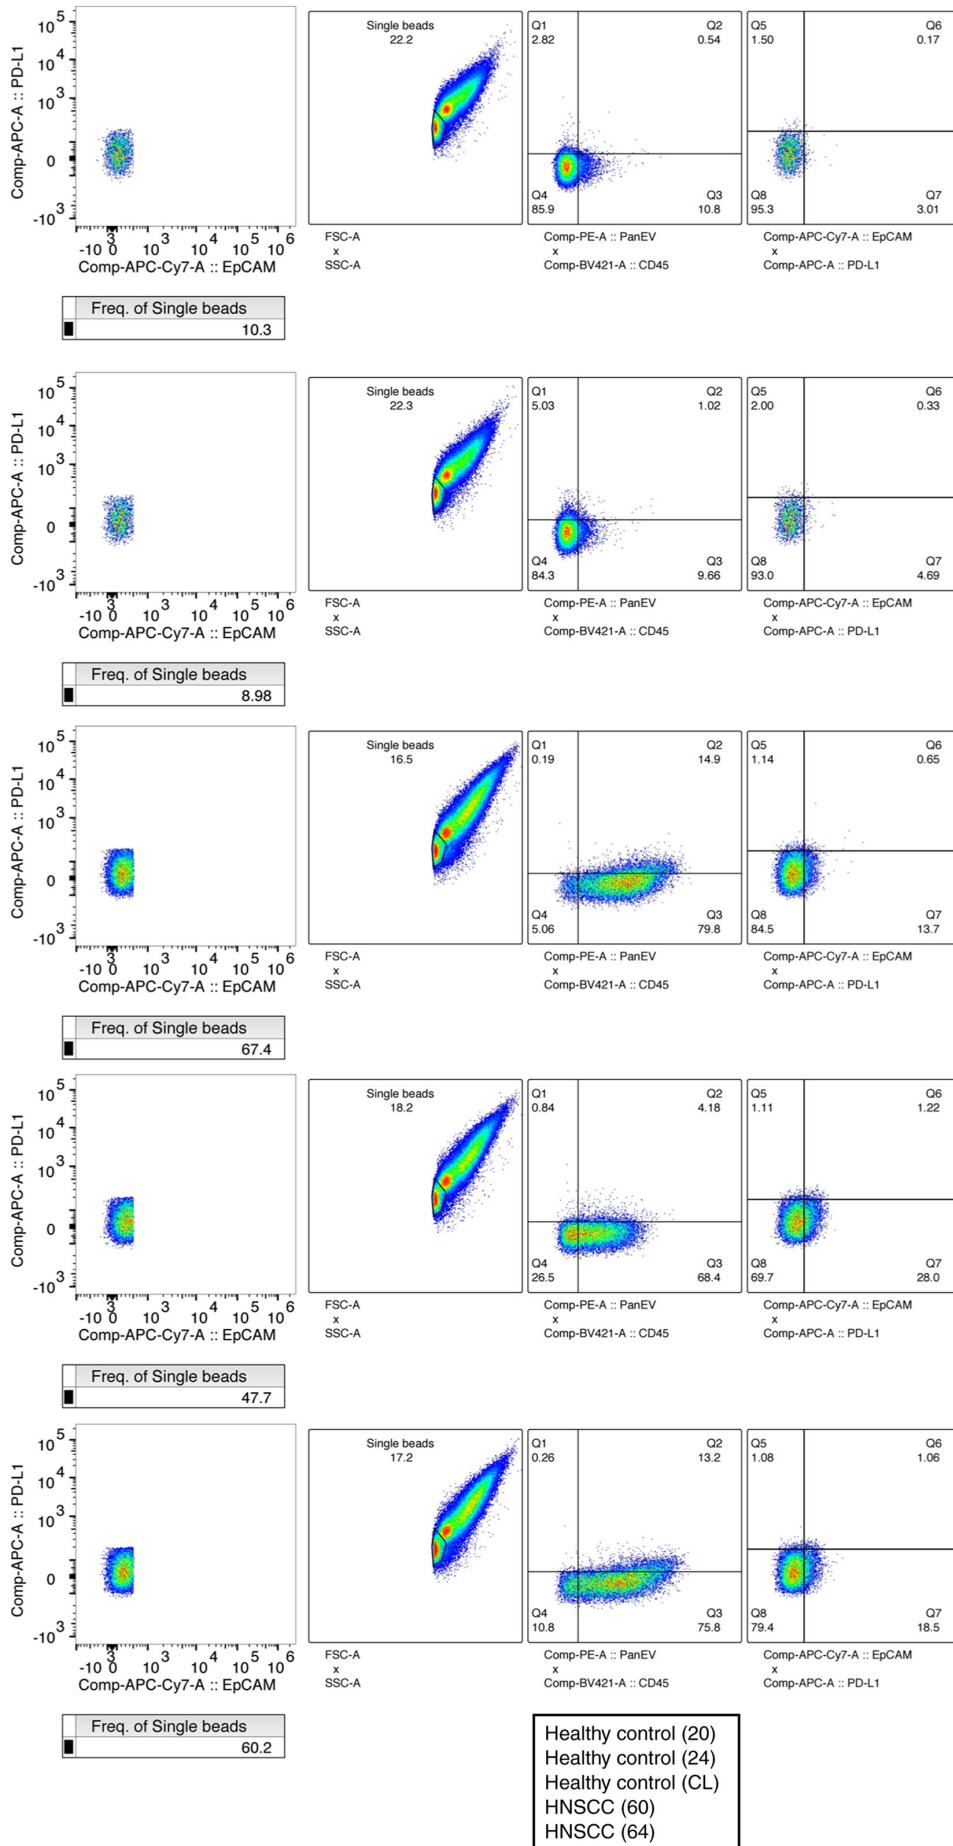

Figure S3. Continued.

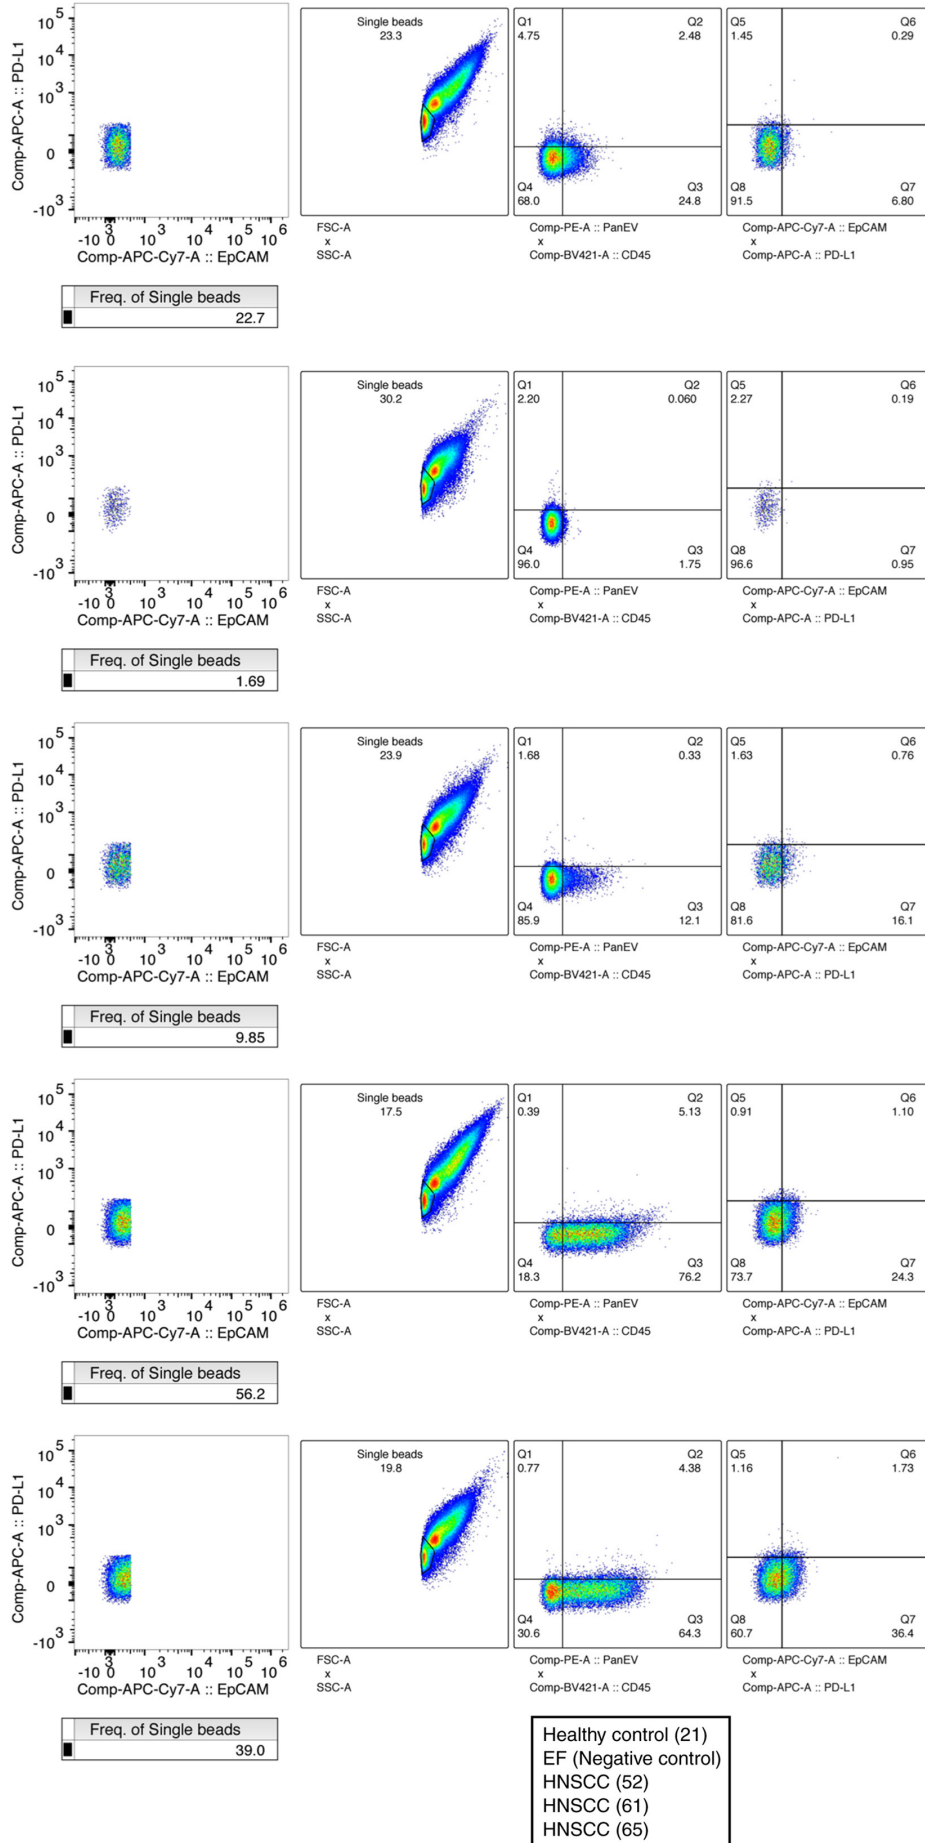

Figure S3. Continued.

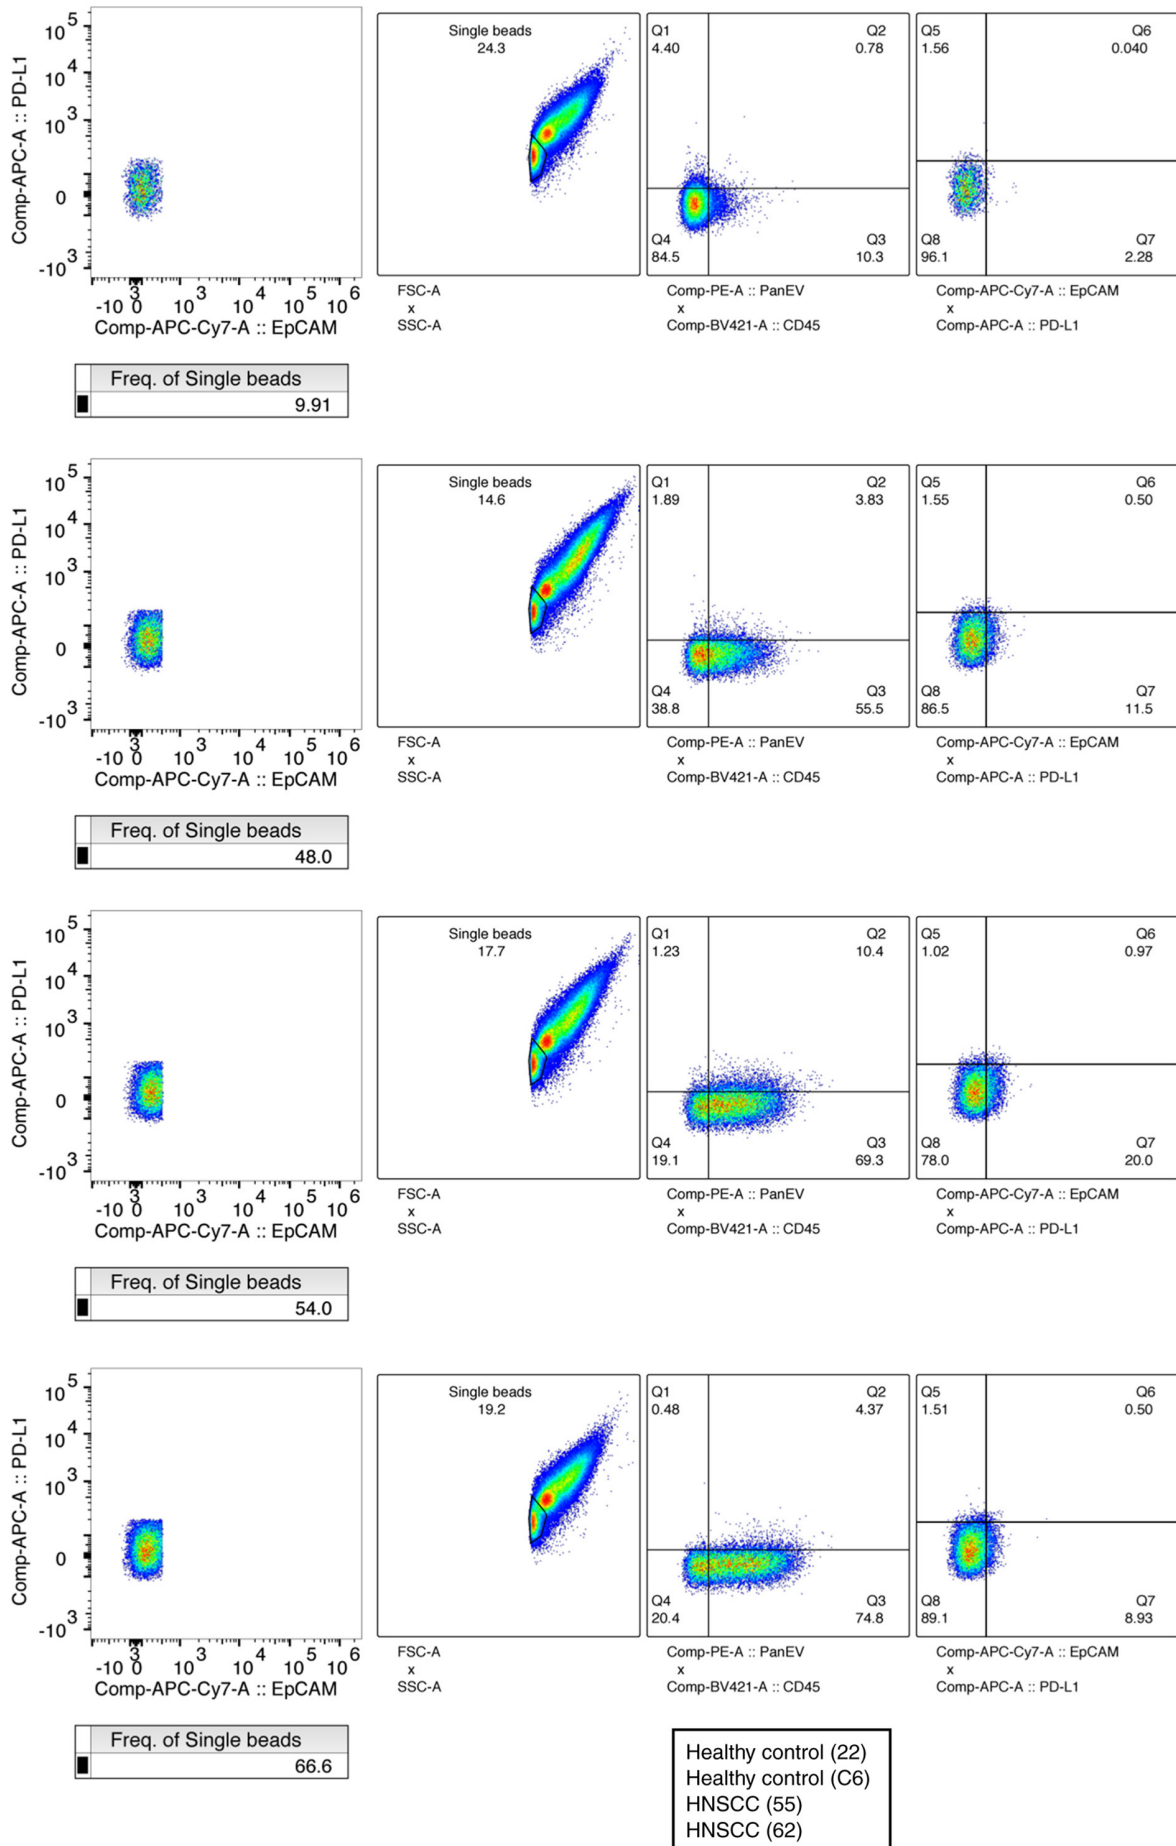

Figure S3. Continued.

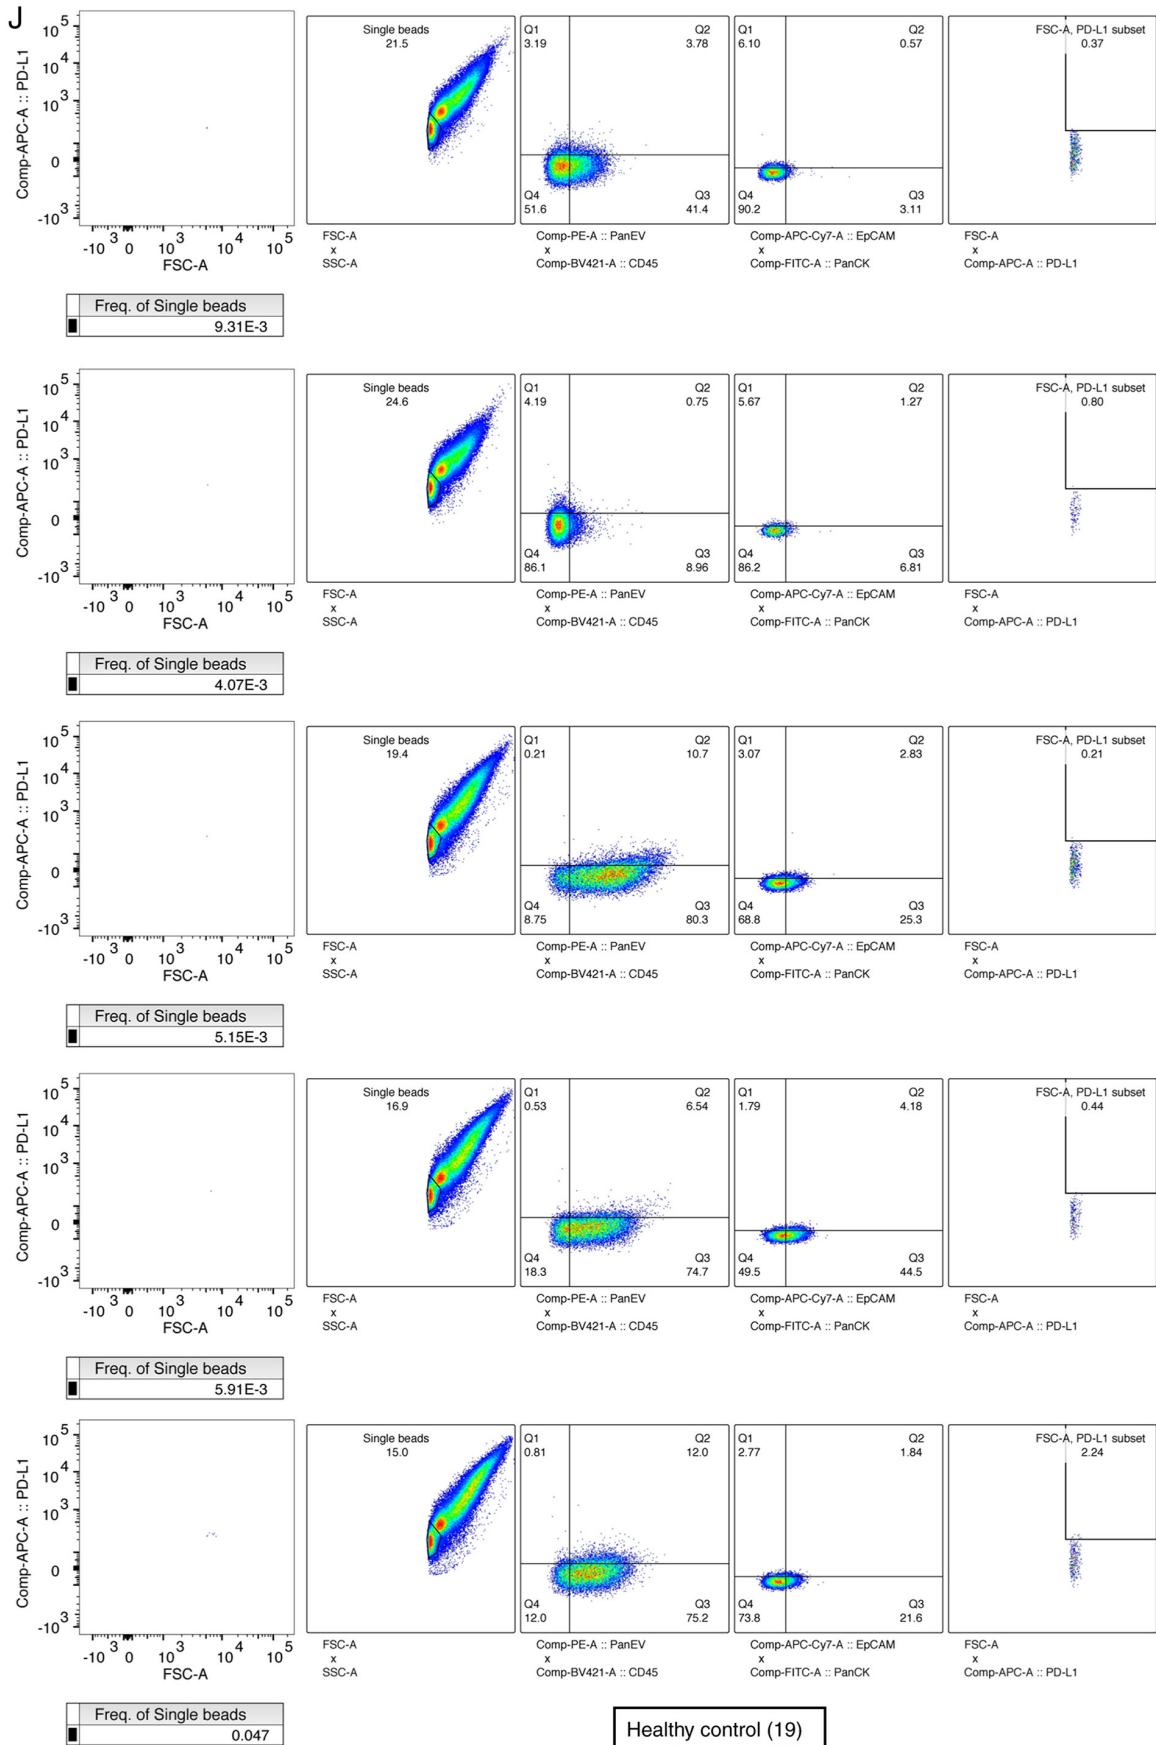

Healthy control (19)  
 Healthy control (23)  
 Healthy control (C7)  
 HNSCC (59)  
 HNSCC (63)



Figure S3. Continued.

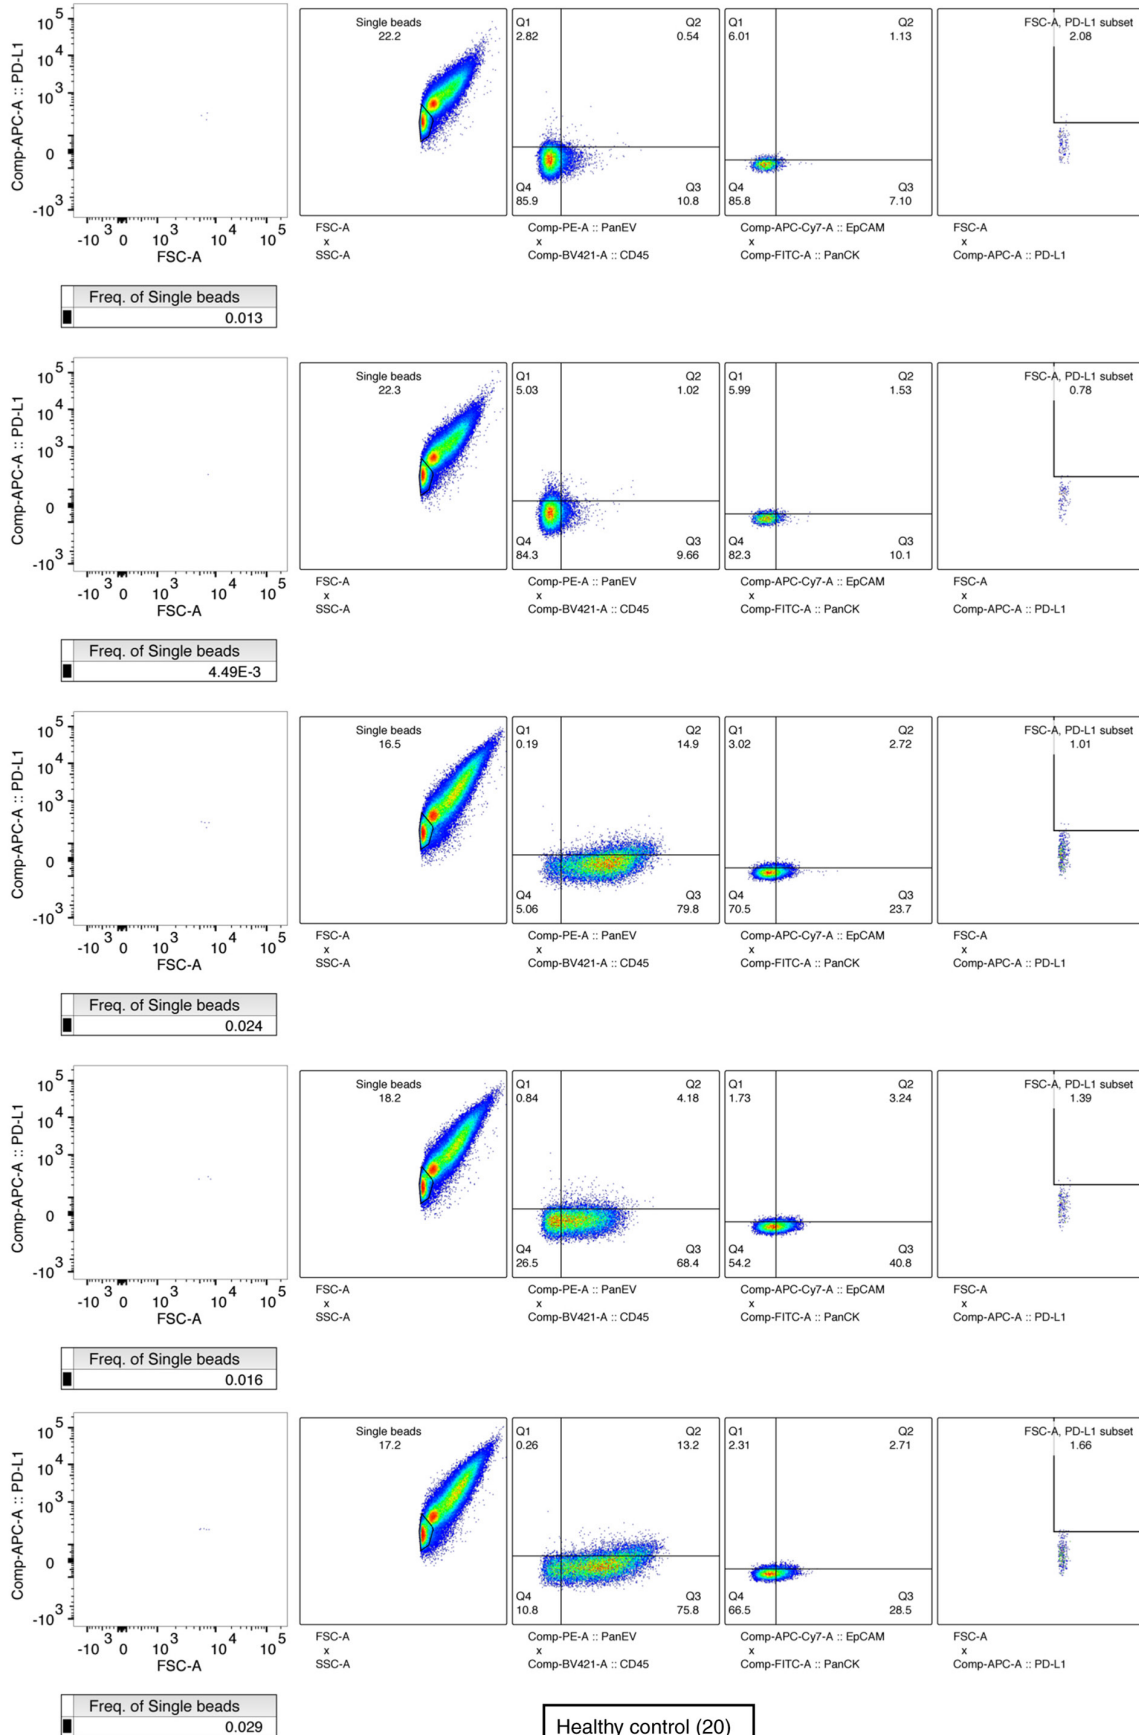

Healthy control (20)  
 Healthy control (24)  
 Healthy control (CL)  
 HNSCC (60)  
 HNSCC (64)

Figure S3. Continued.

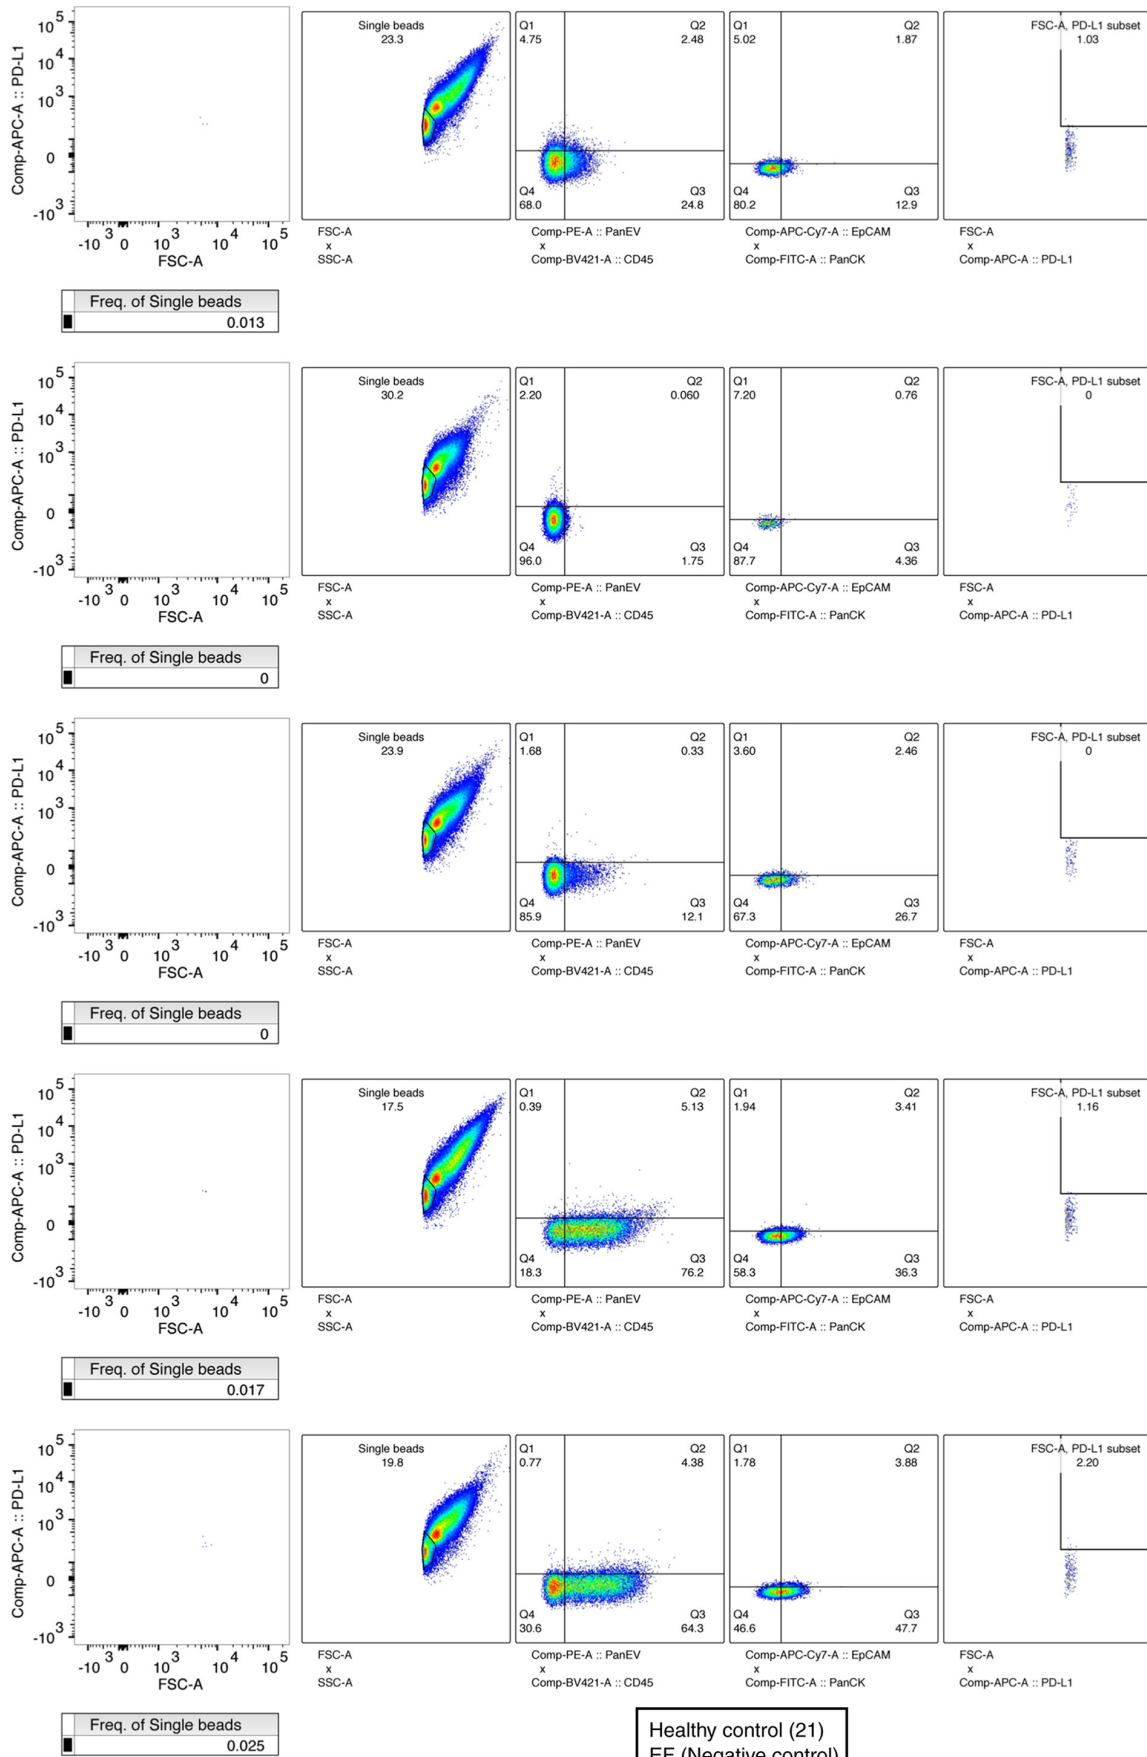

Healthy control (21)  
 EF (Negative control)  
 HNSCC (52)  
 HNSCC (61)  
 HNSCC (65)

Figure S3. Continued.

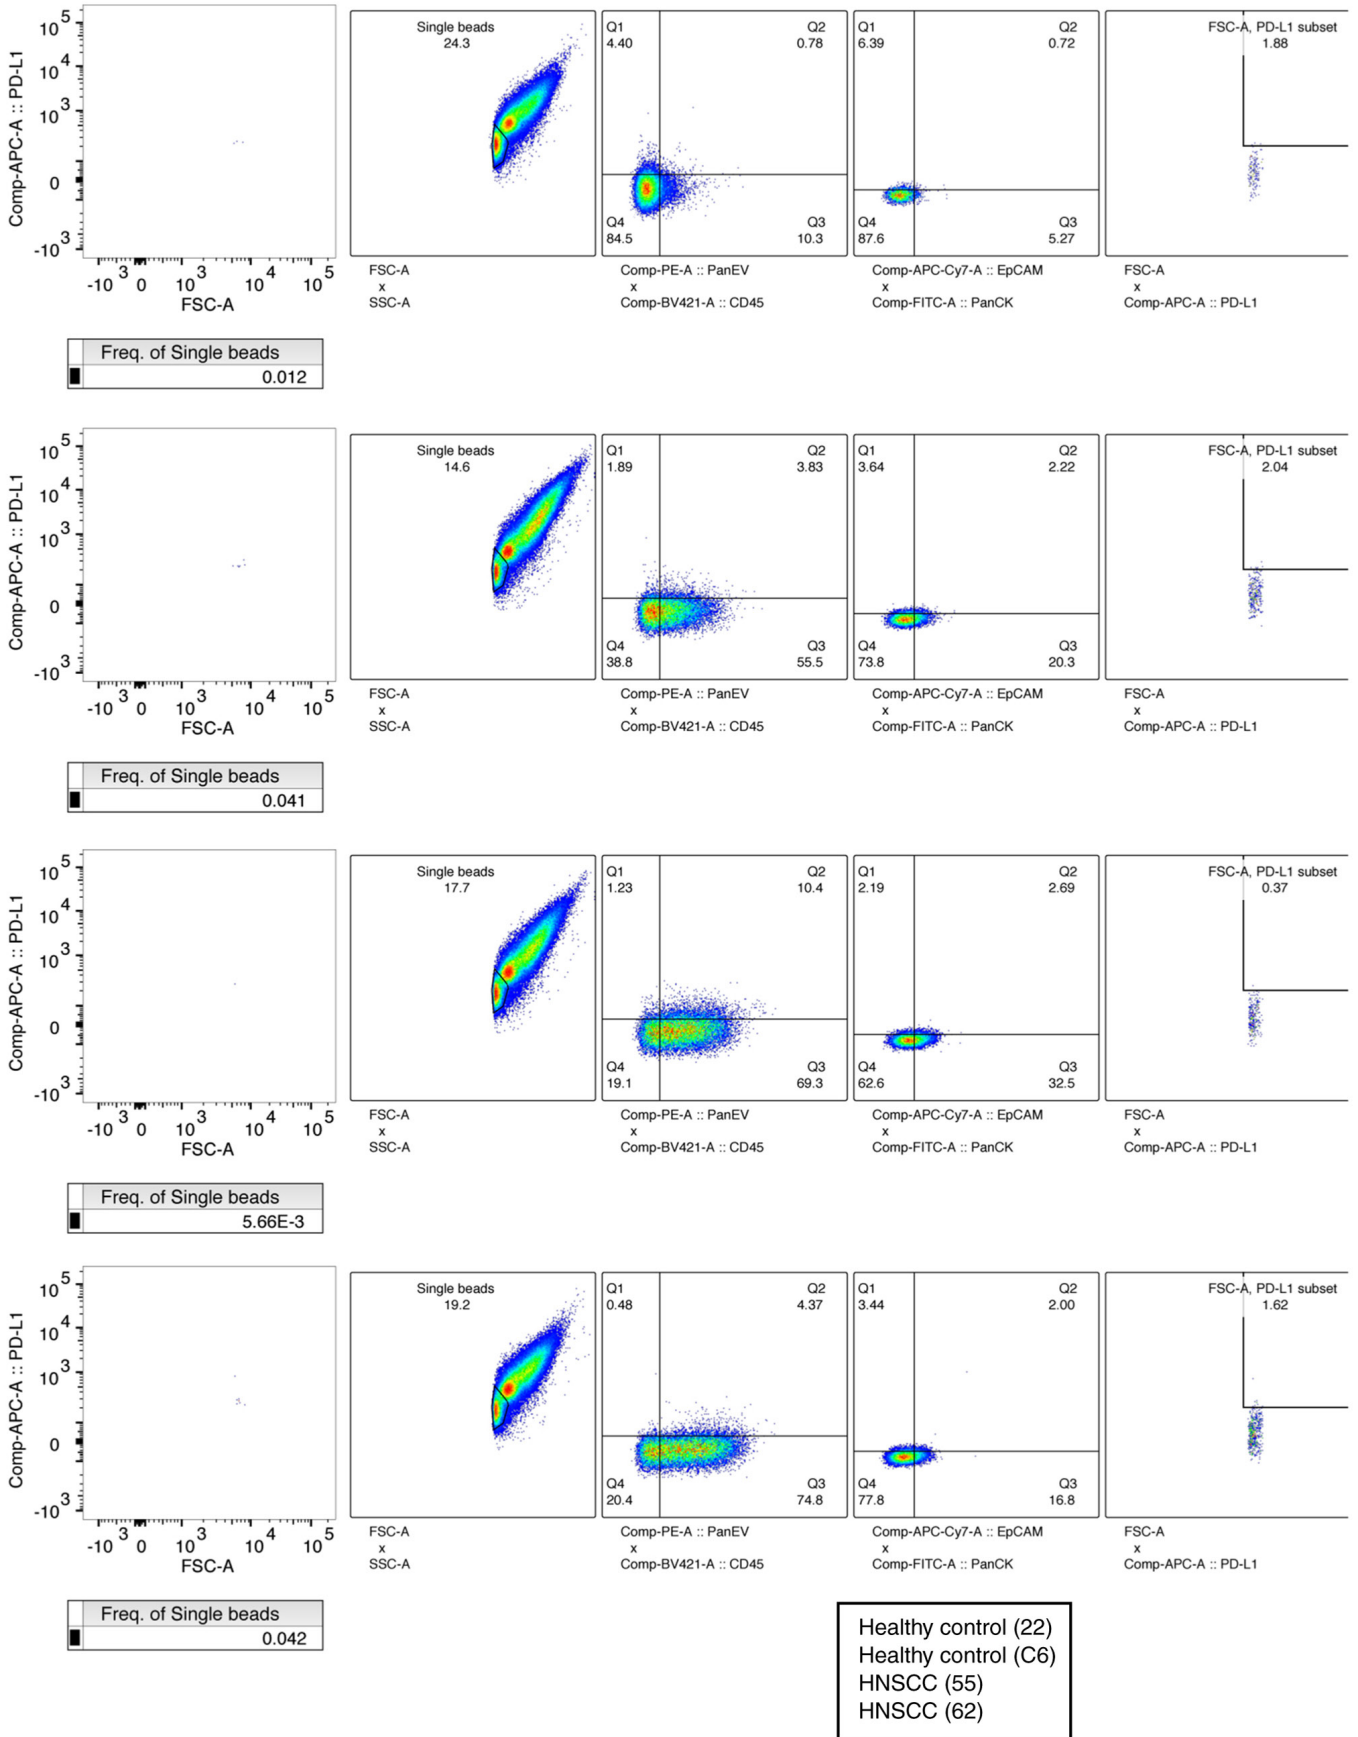

Figure S3. Continued.

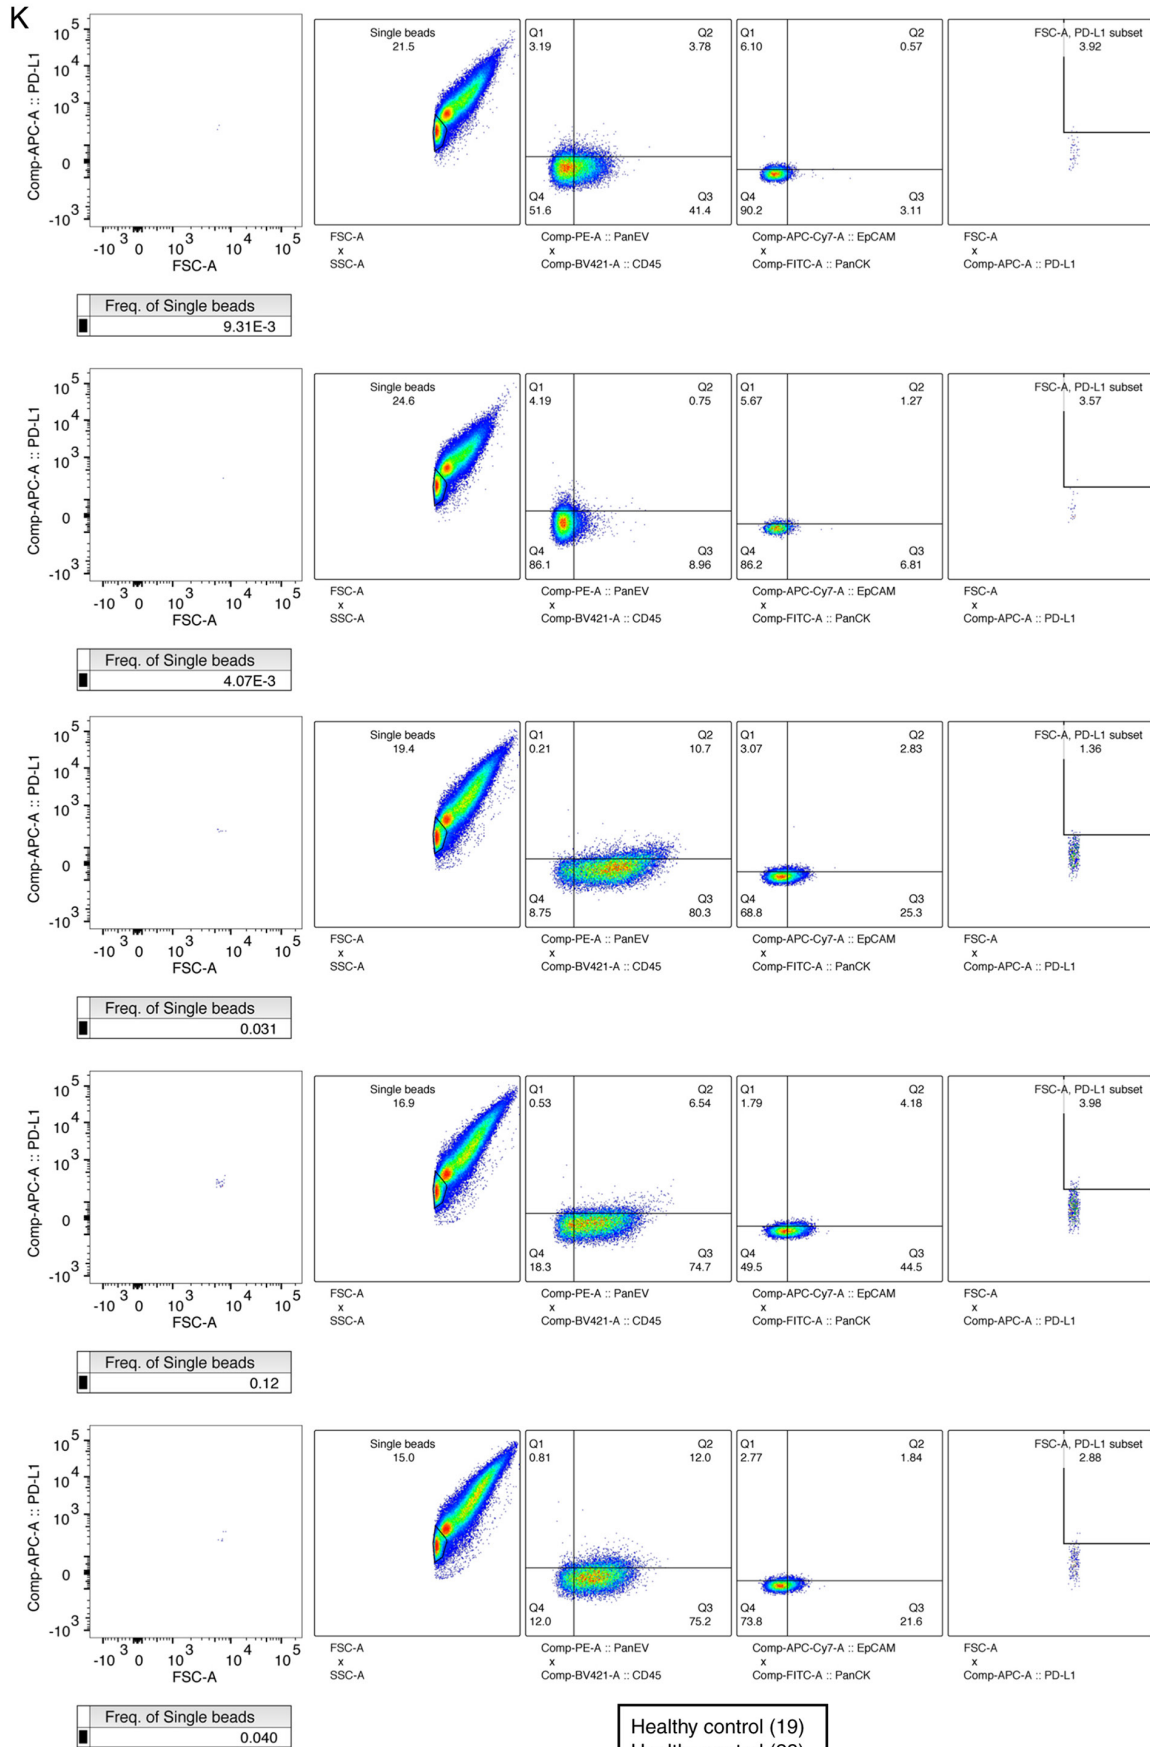

Healthy control (19)  
 Healthy control (23)  
 Healthy control (C7)  
 HNSCC (59)  
 HNSCC (63)

Figure S3. Continued.

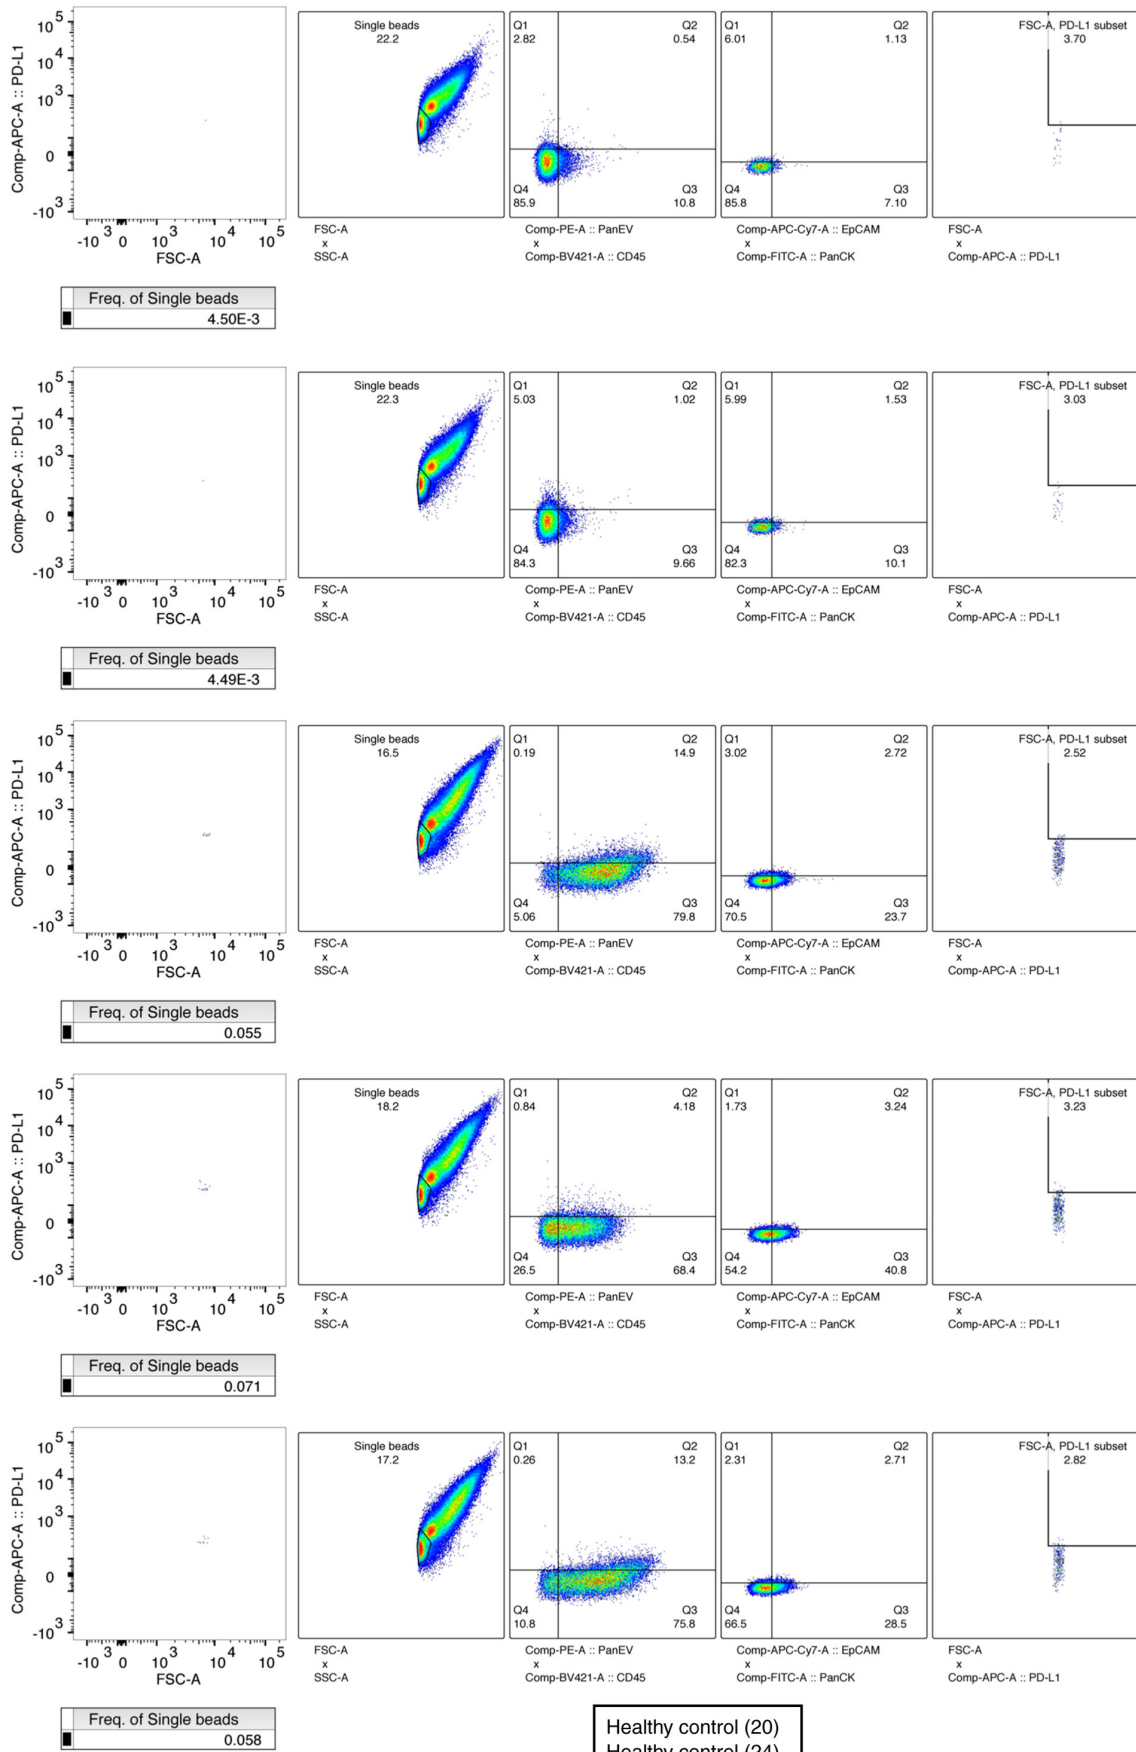

Healthy control (20)  
 Healthy control (24)  
 Healthy control (CL)  
 HNSCC (60)  
 HNSCC (64)



Figure S3. Continued.

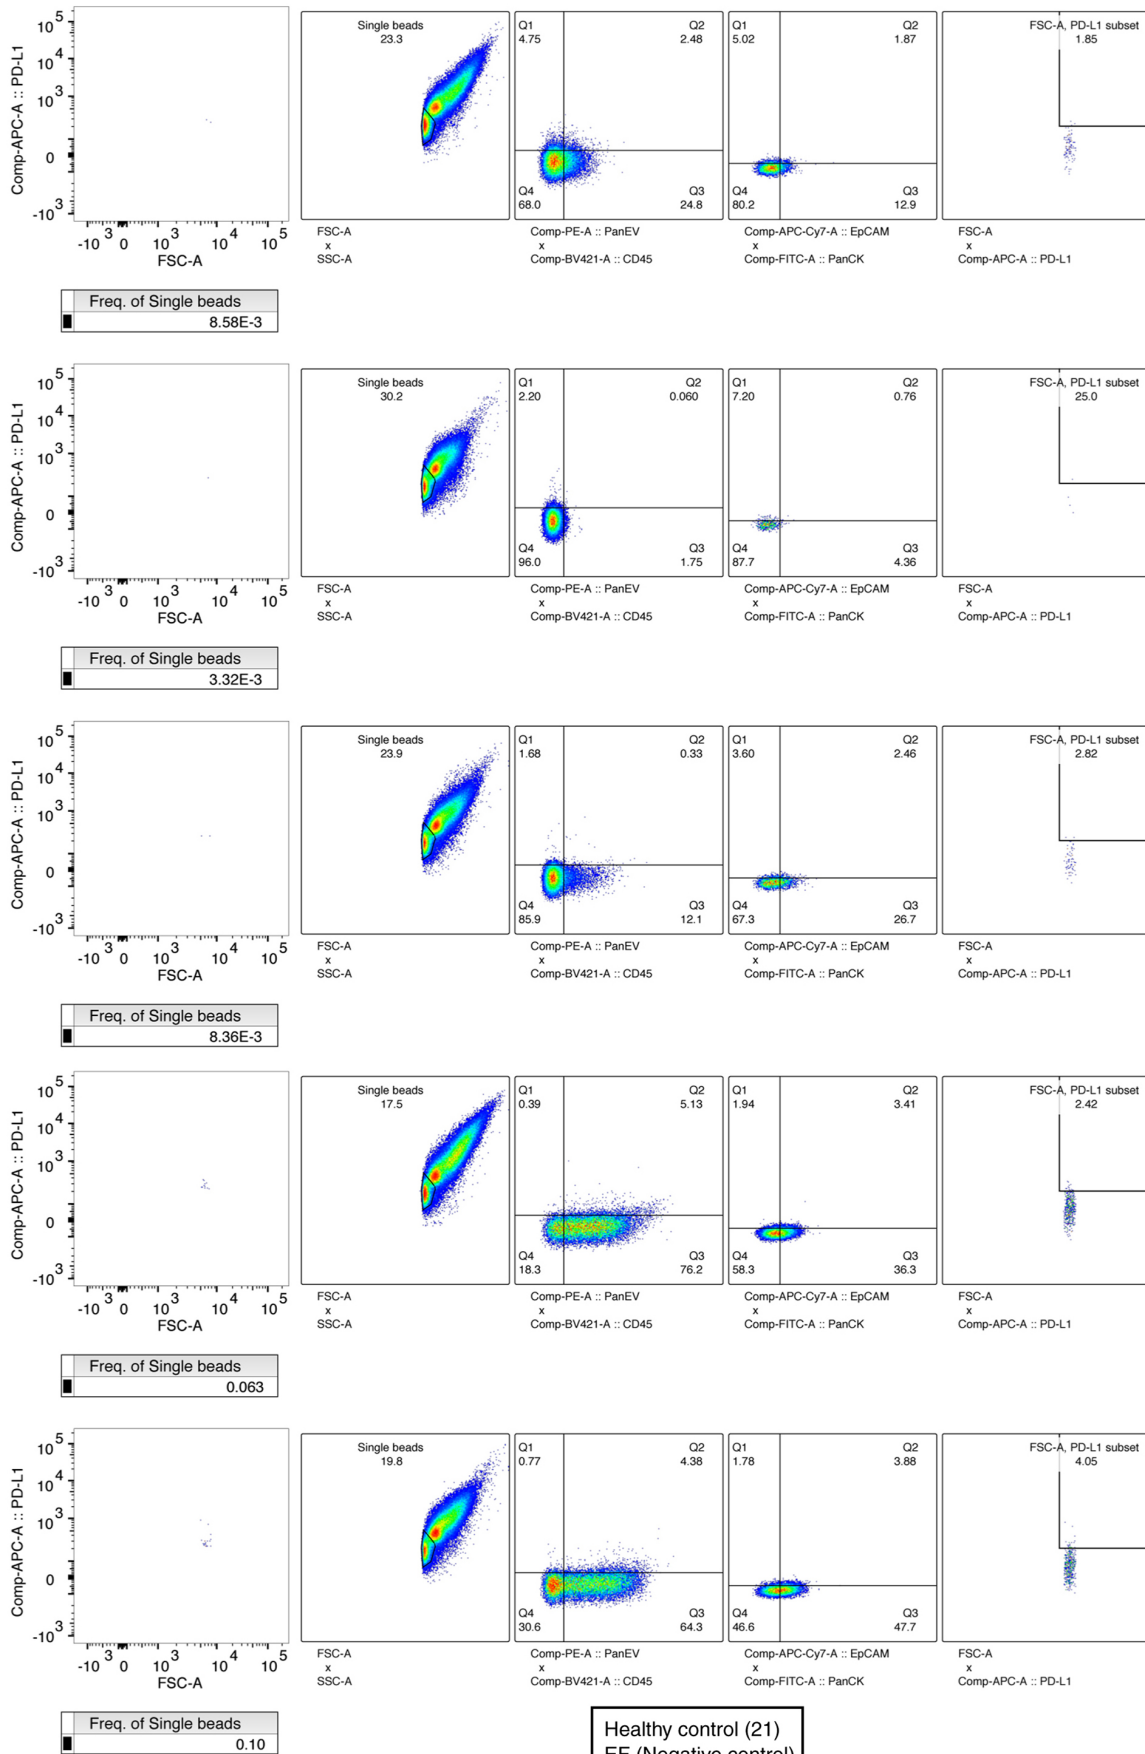

Healthy control (21)  
 EF (Negative control)  
 HNSCC (52)  
 HNSCC (61)  
 HNSCC (65)

Figure S3. Continued.

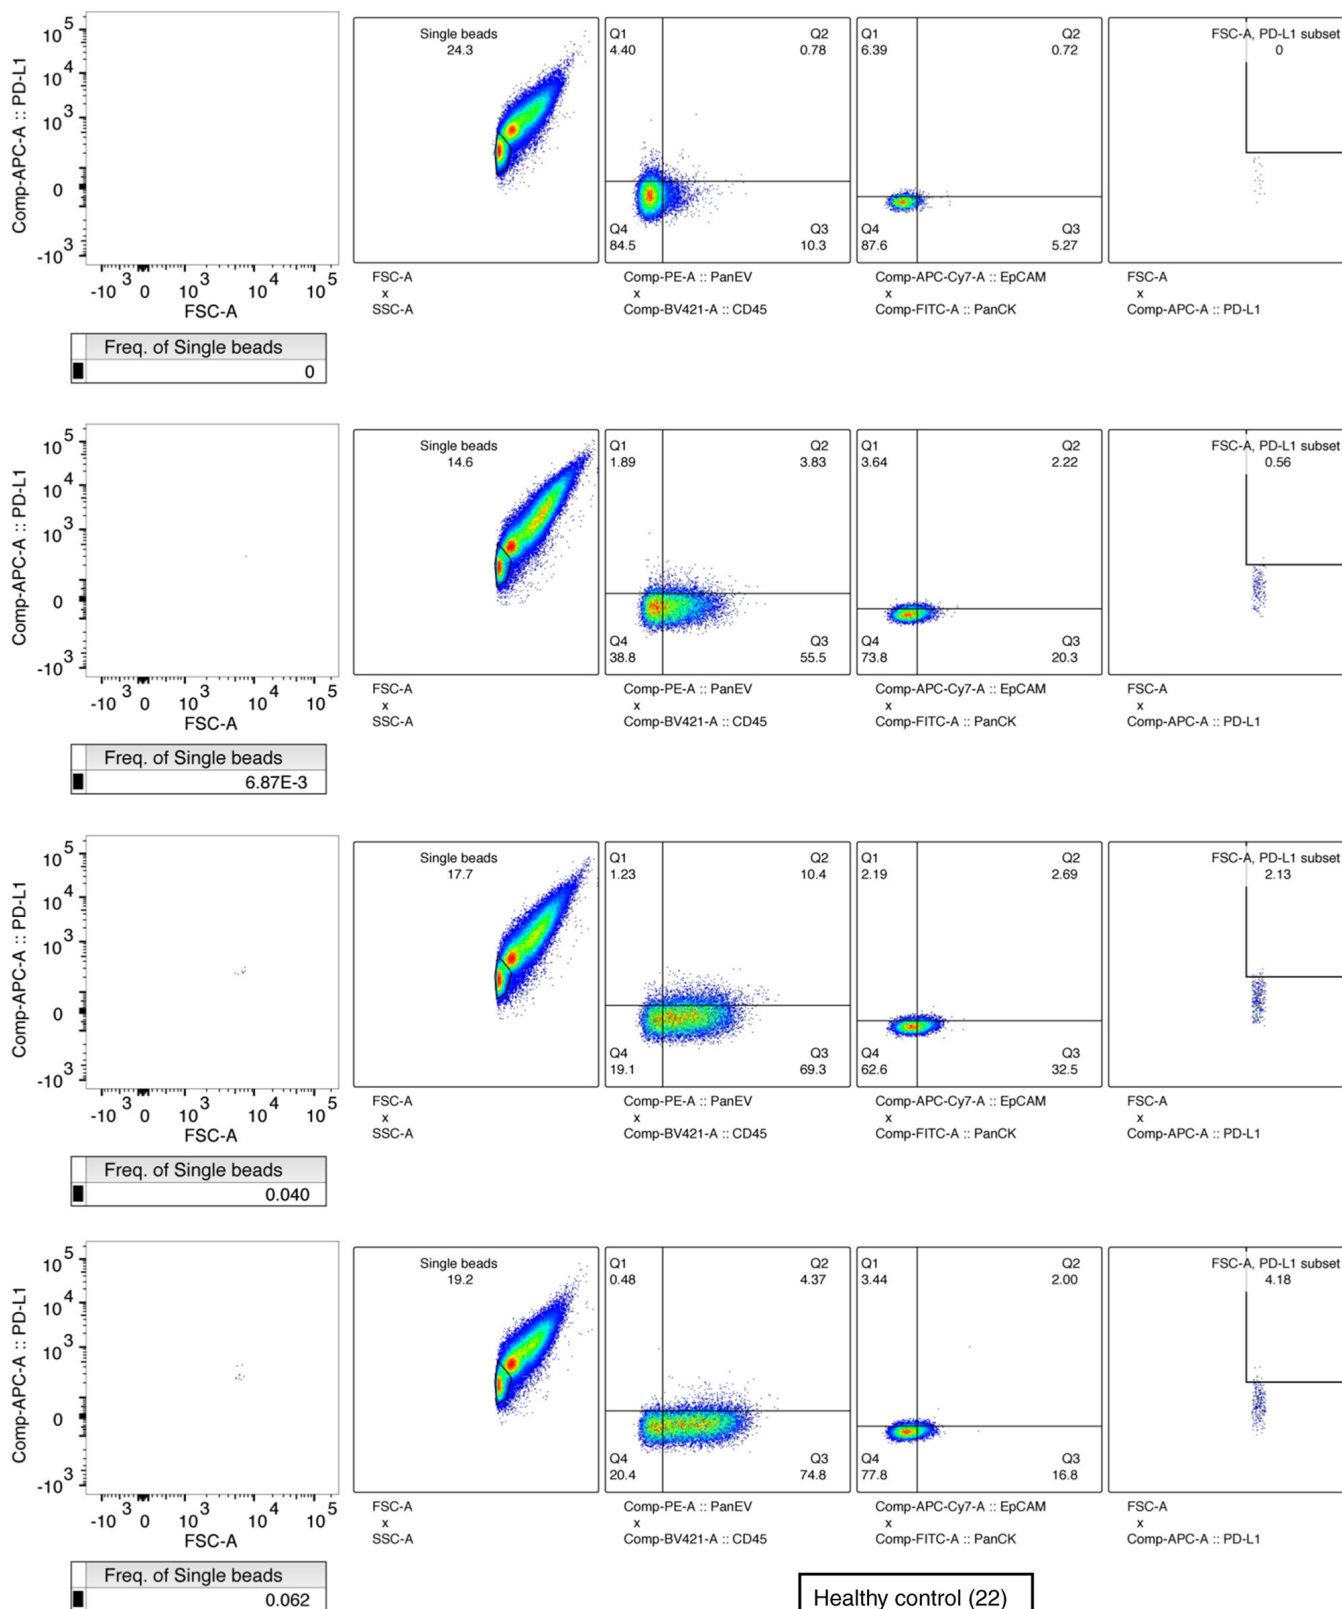

Healthy control (22)  
 Healthy control (C6)  
 HNSCC (55)  
 HNSCC (62)

Figure S3. Continued.

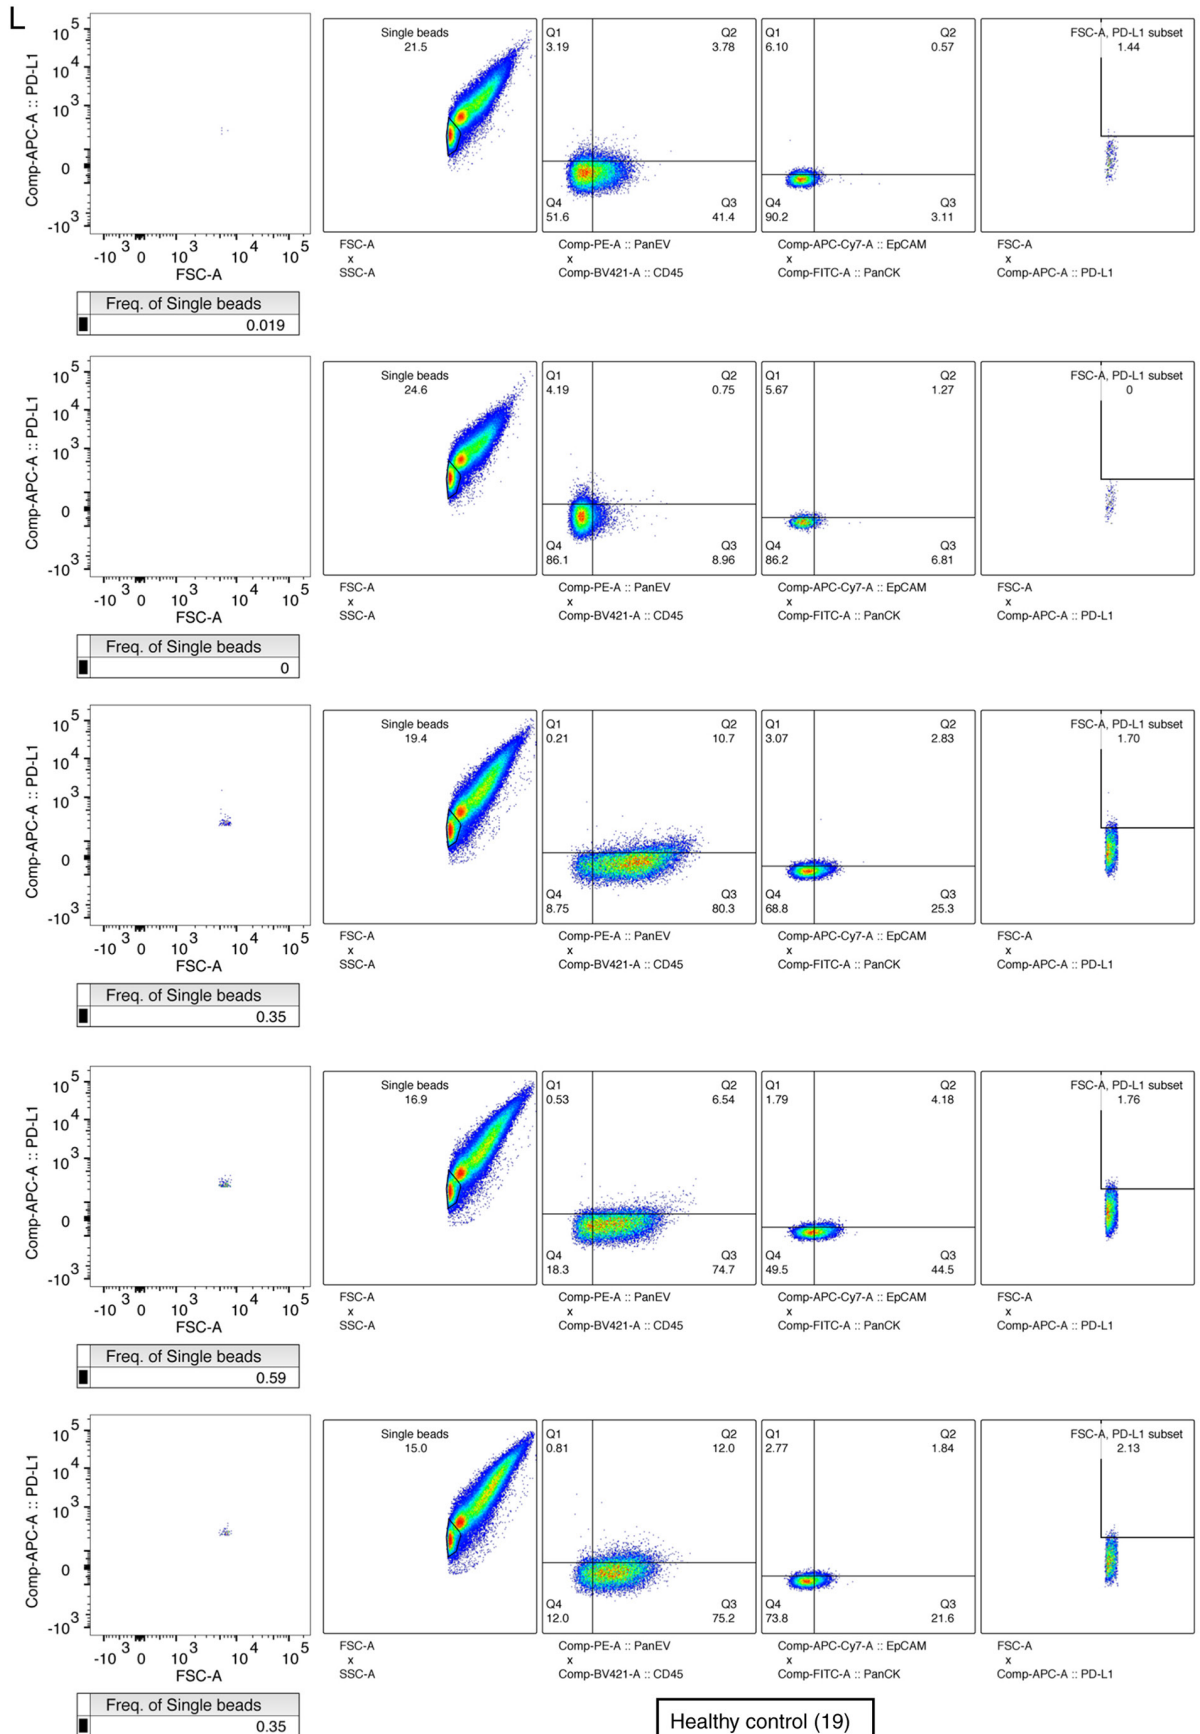

Healthy control (19)  
 Healthy control (23)  
 Healthy control (C7)  
 HNSCC (59)  
 HNSCC (63)

Figure S3. Continued.

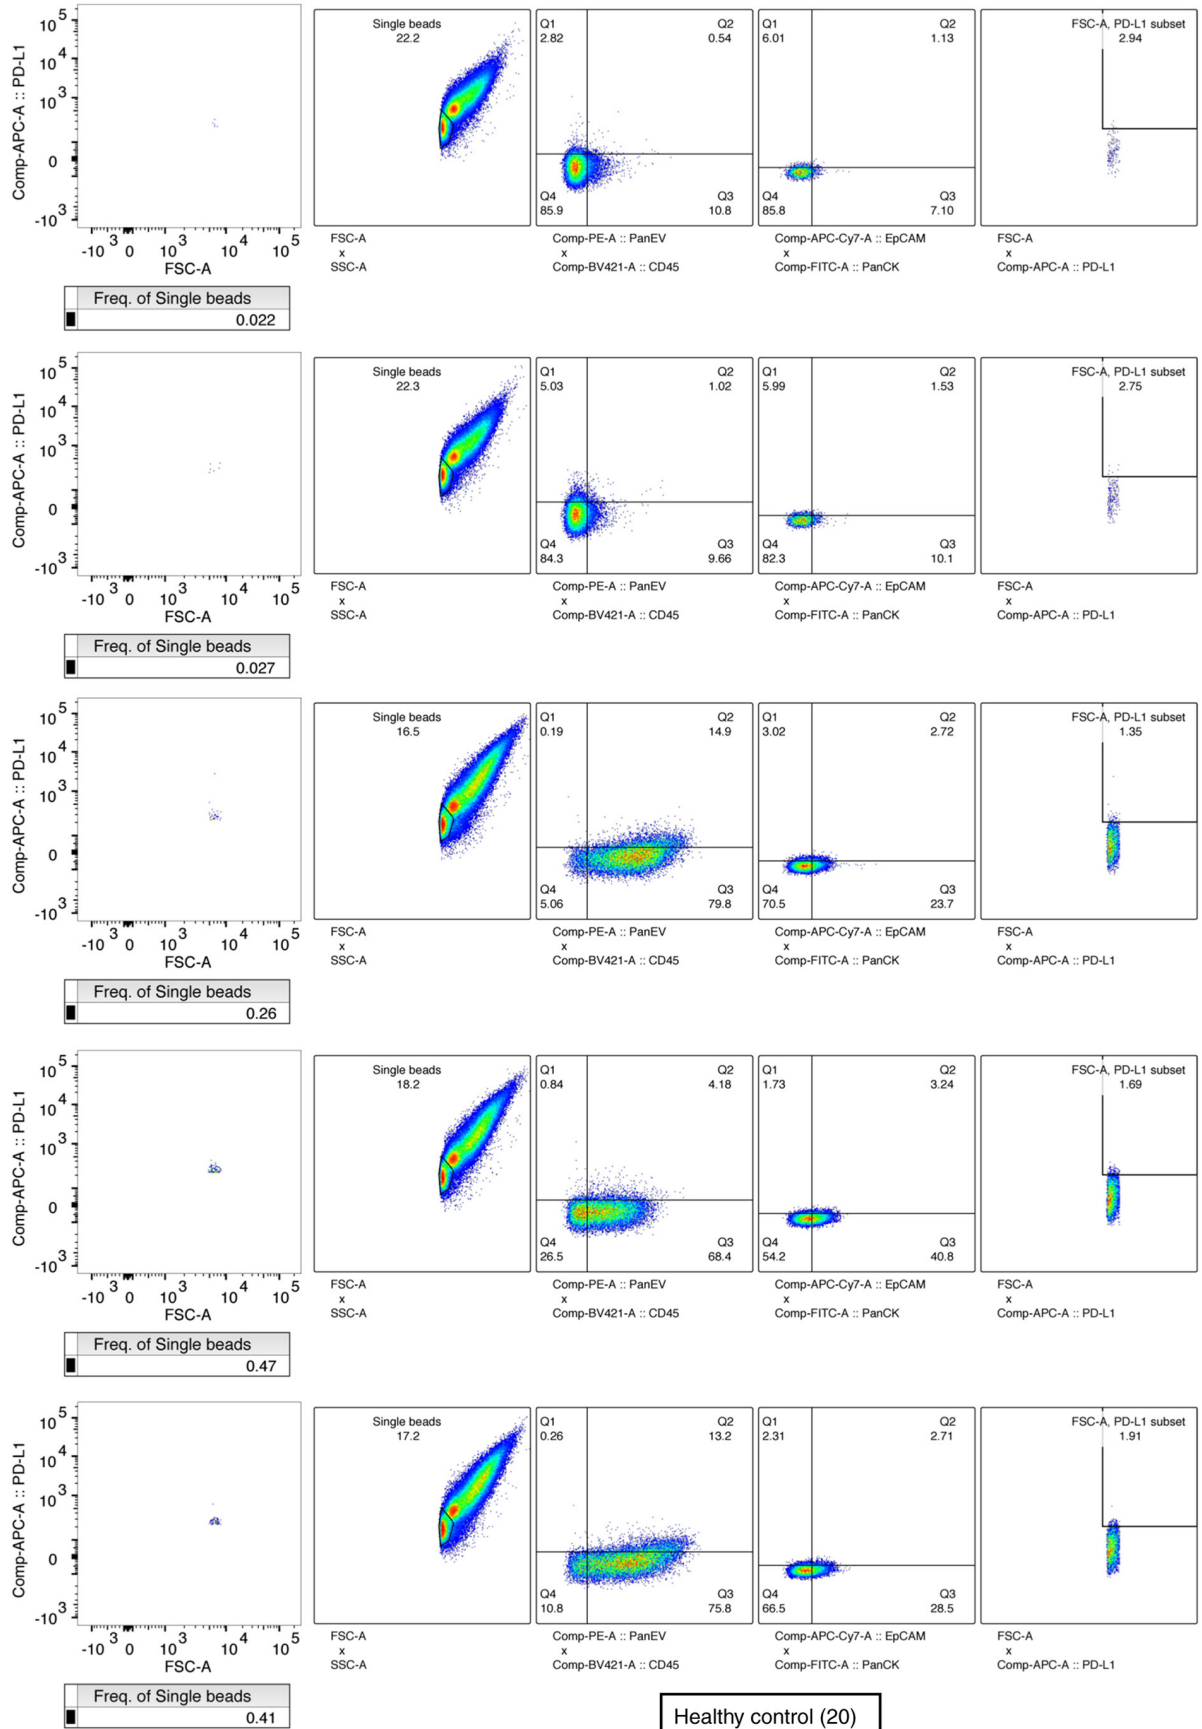

Healthy control (20)  
 Healthy control (24)  
 Healthy control (CL)  
 HNSCC (60)  
 HNSCC (64)

Figure S3. Continued.

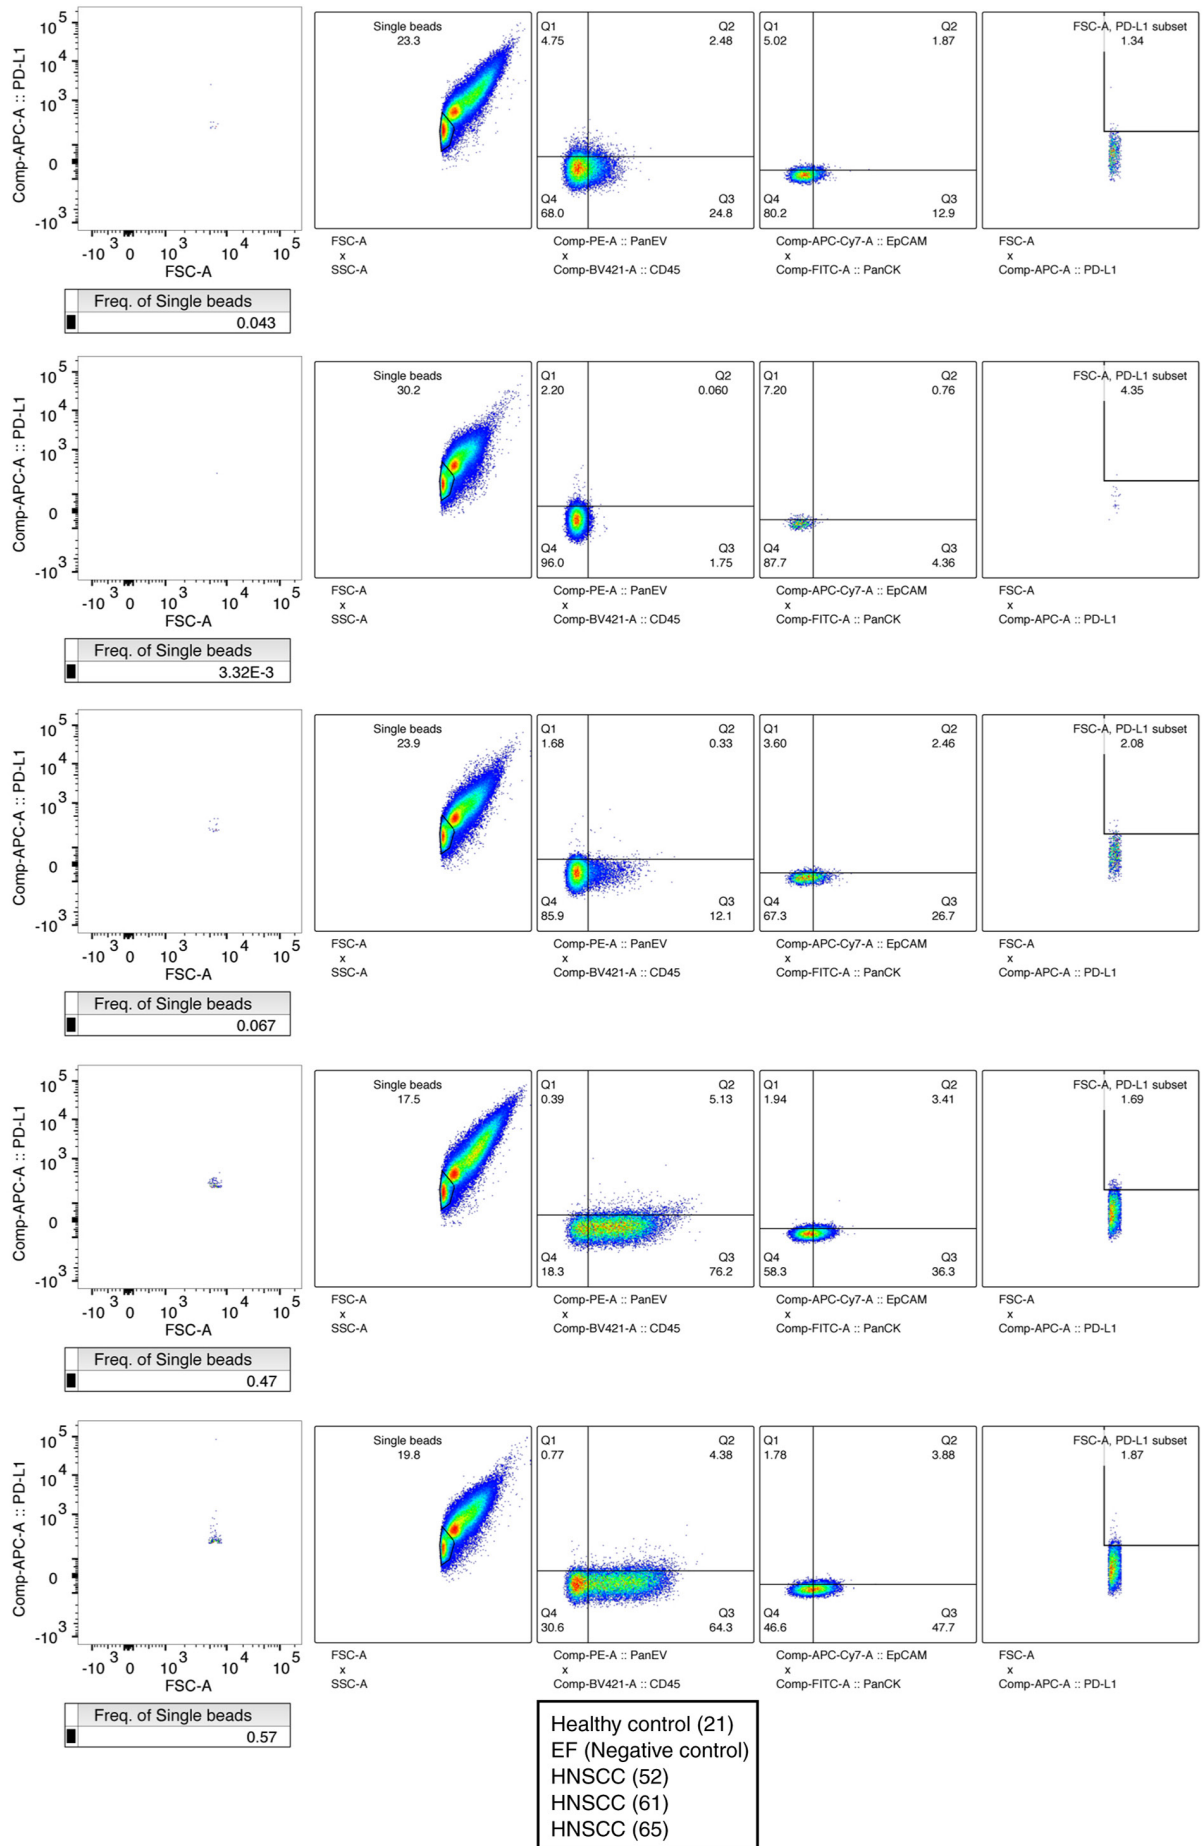



Figure S3. Continued.

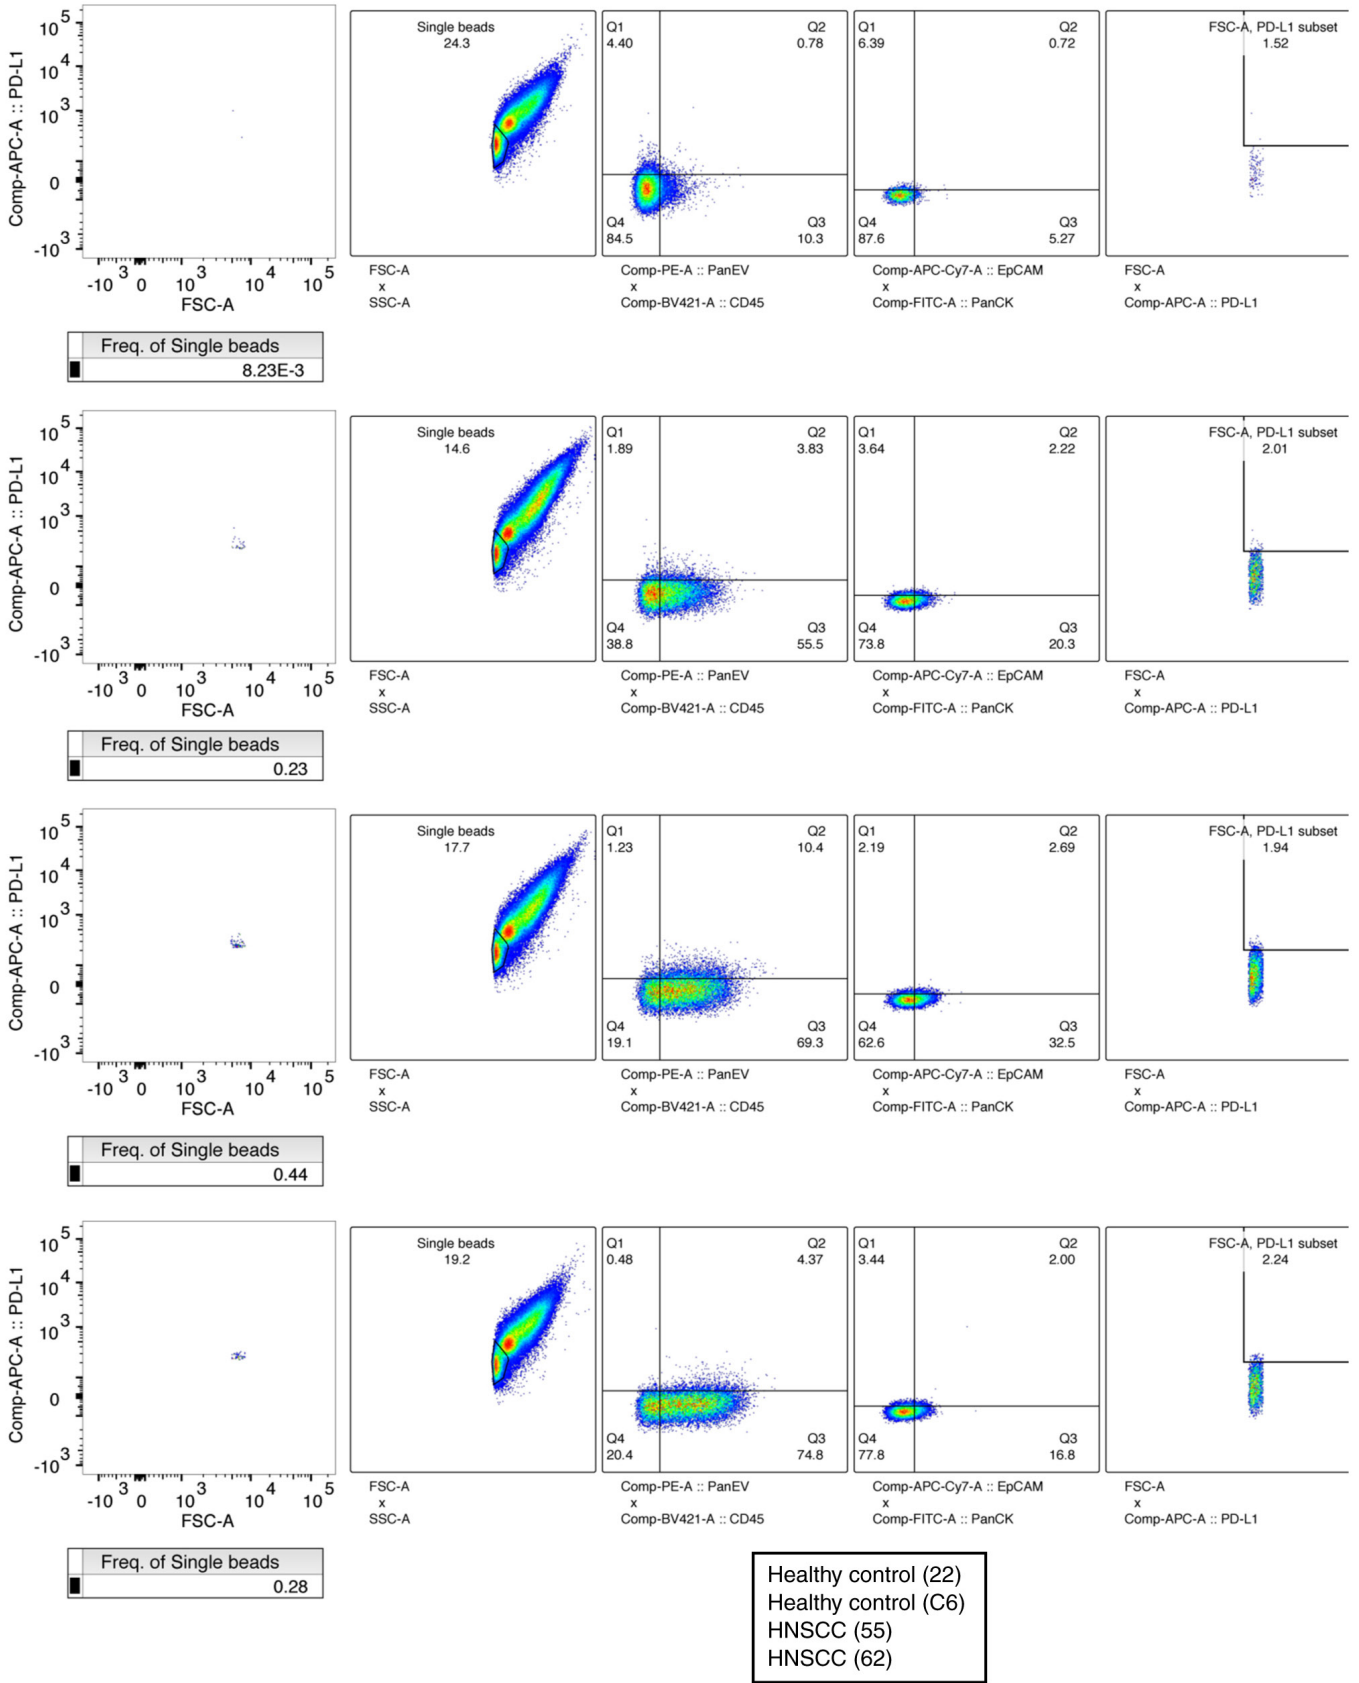

Figure S3. Continued.

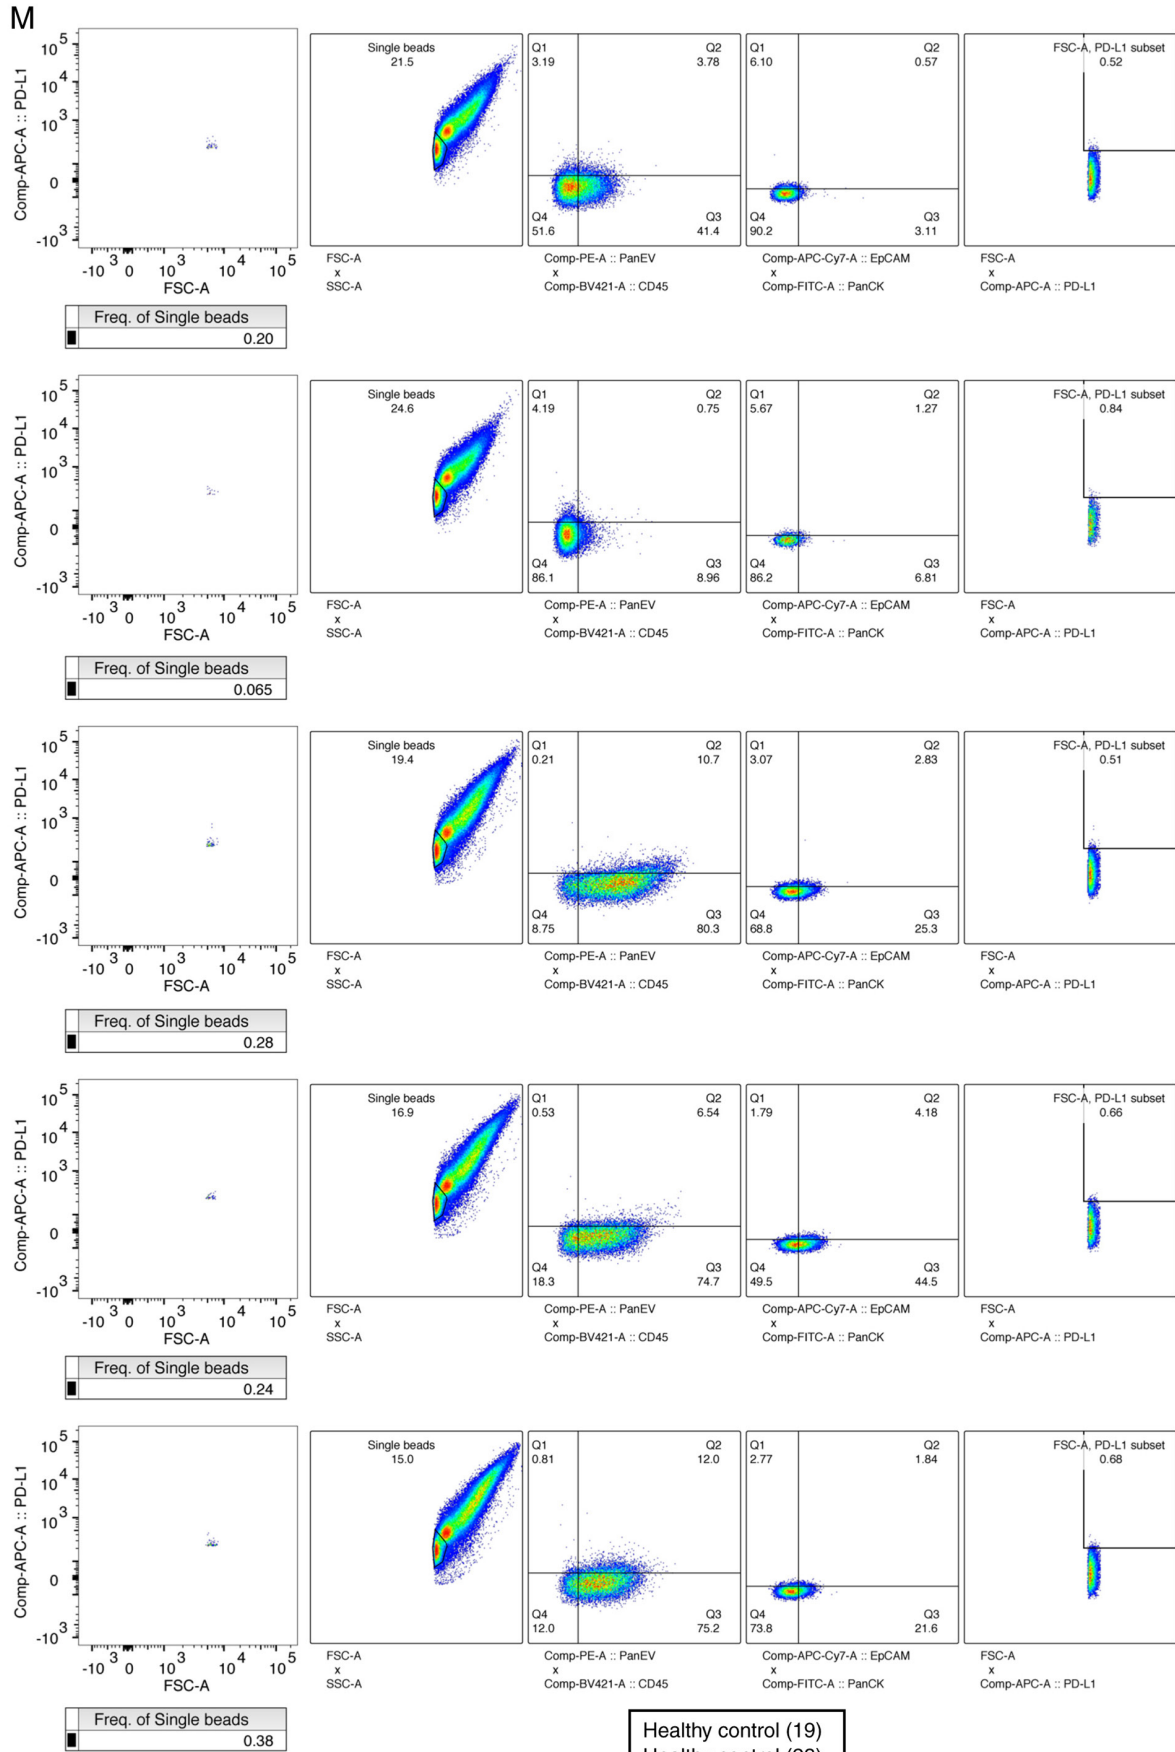

Healthy control (19)  
 Healthy control (23)  
 Healthy control (C7)  
 HNSCC (59)  
 HNSCC (63)

Figure S3. Continued.

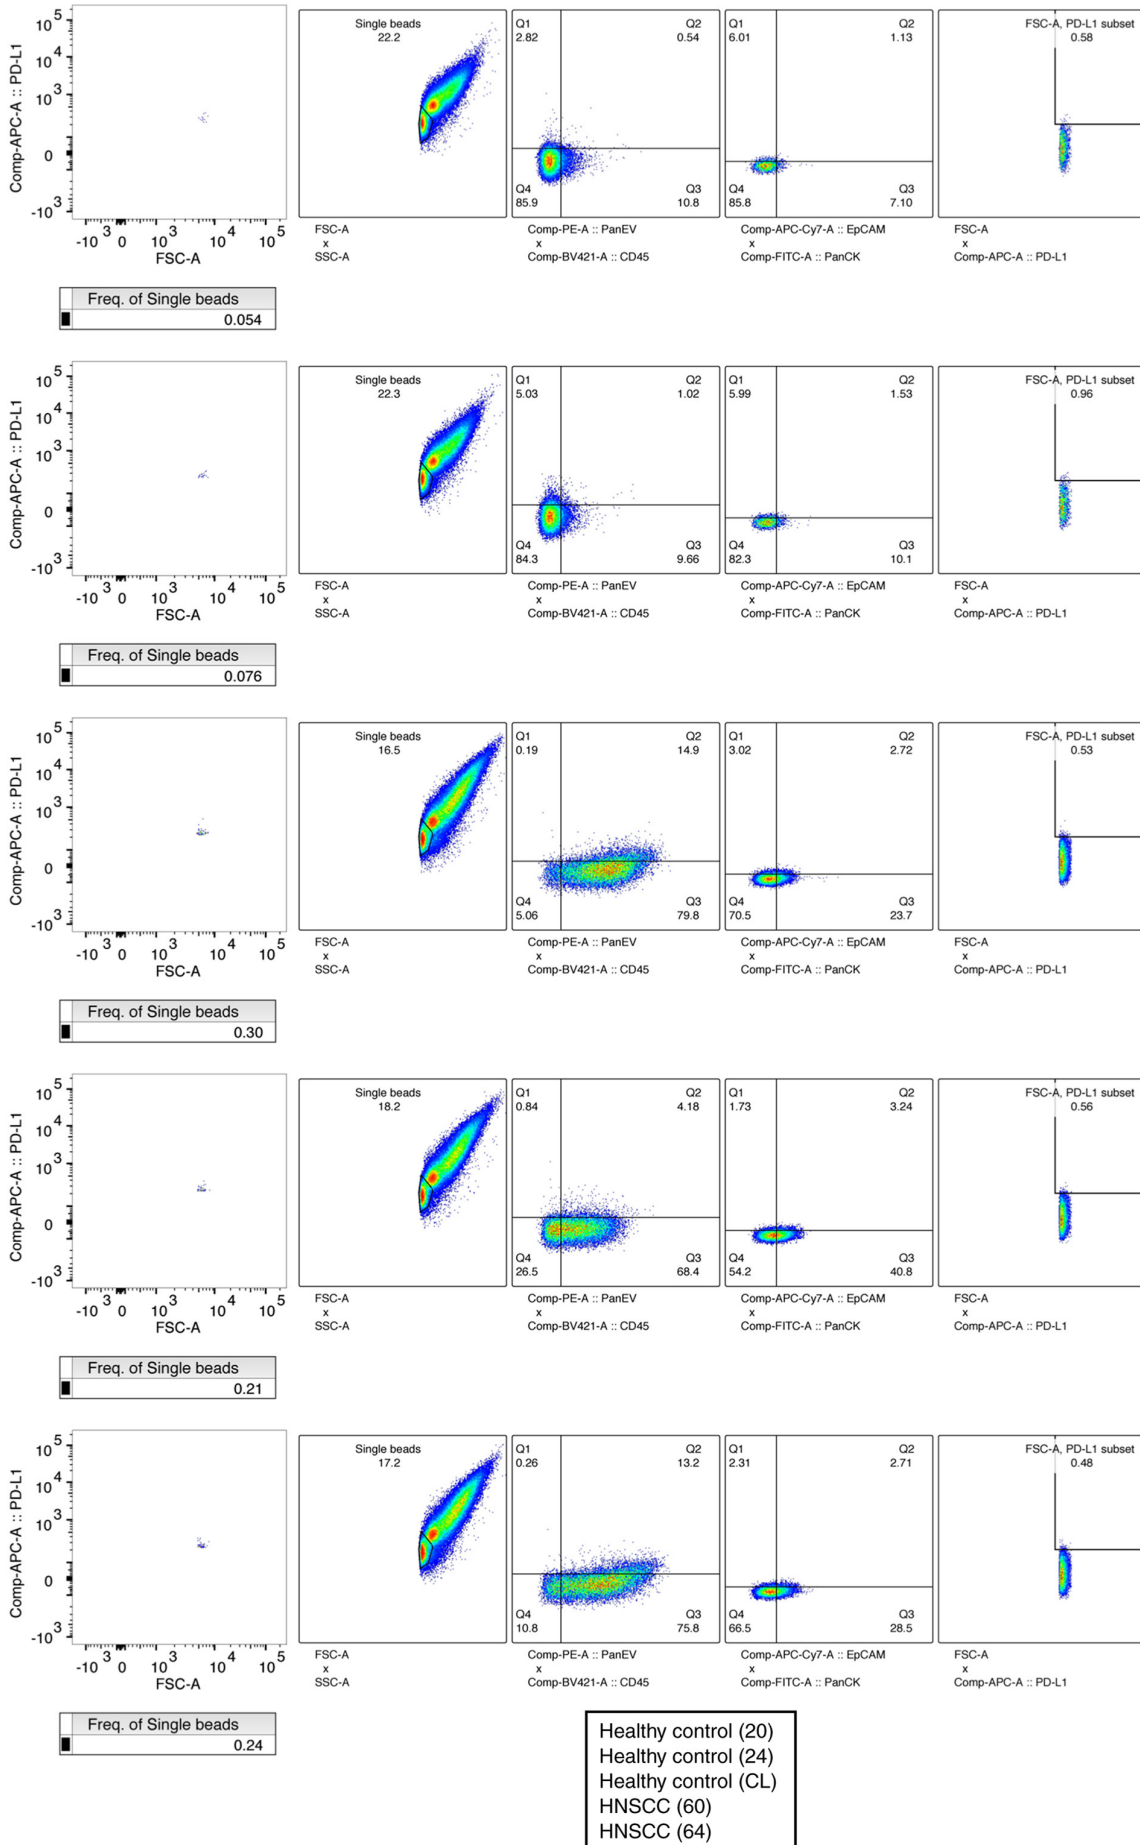

Figure S3. Continued.

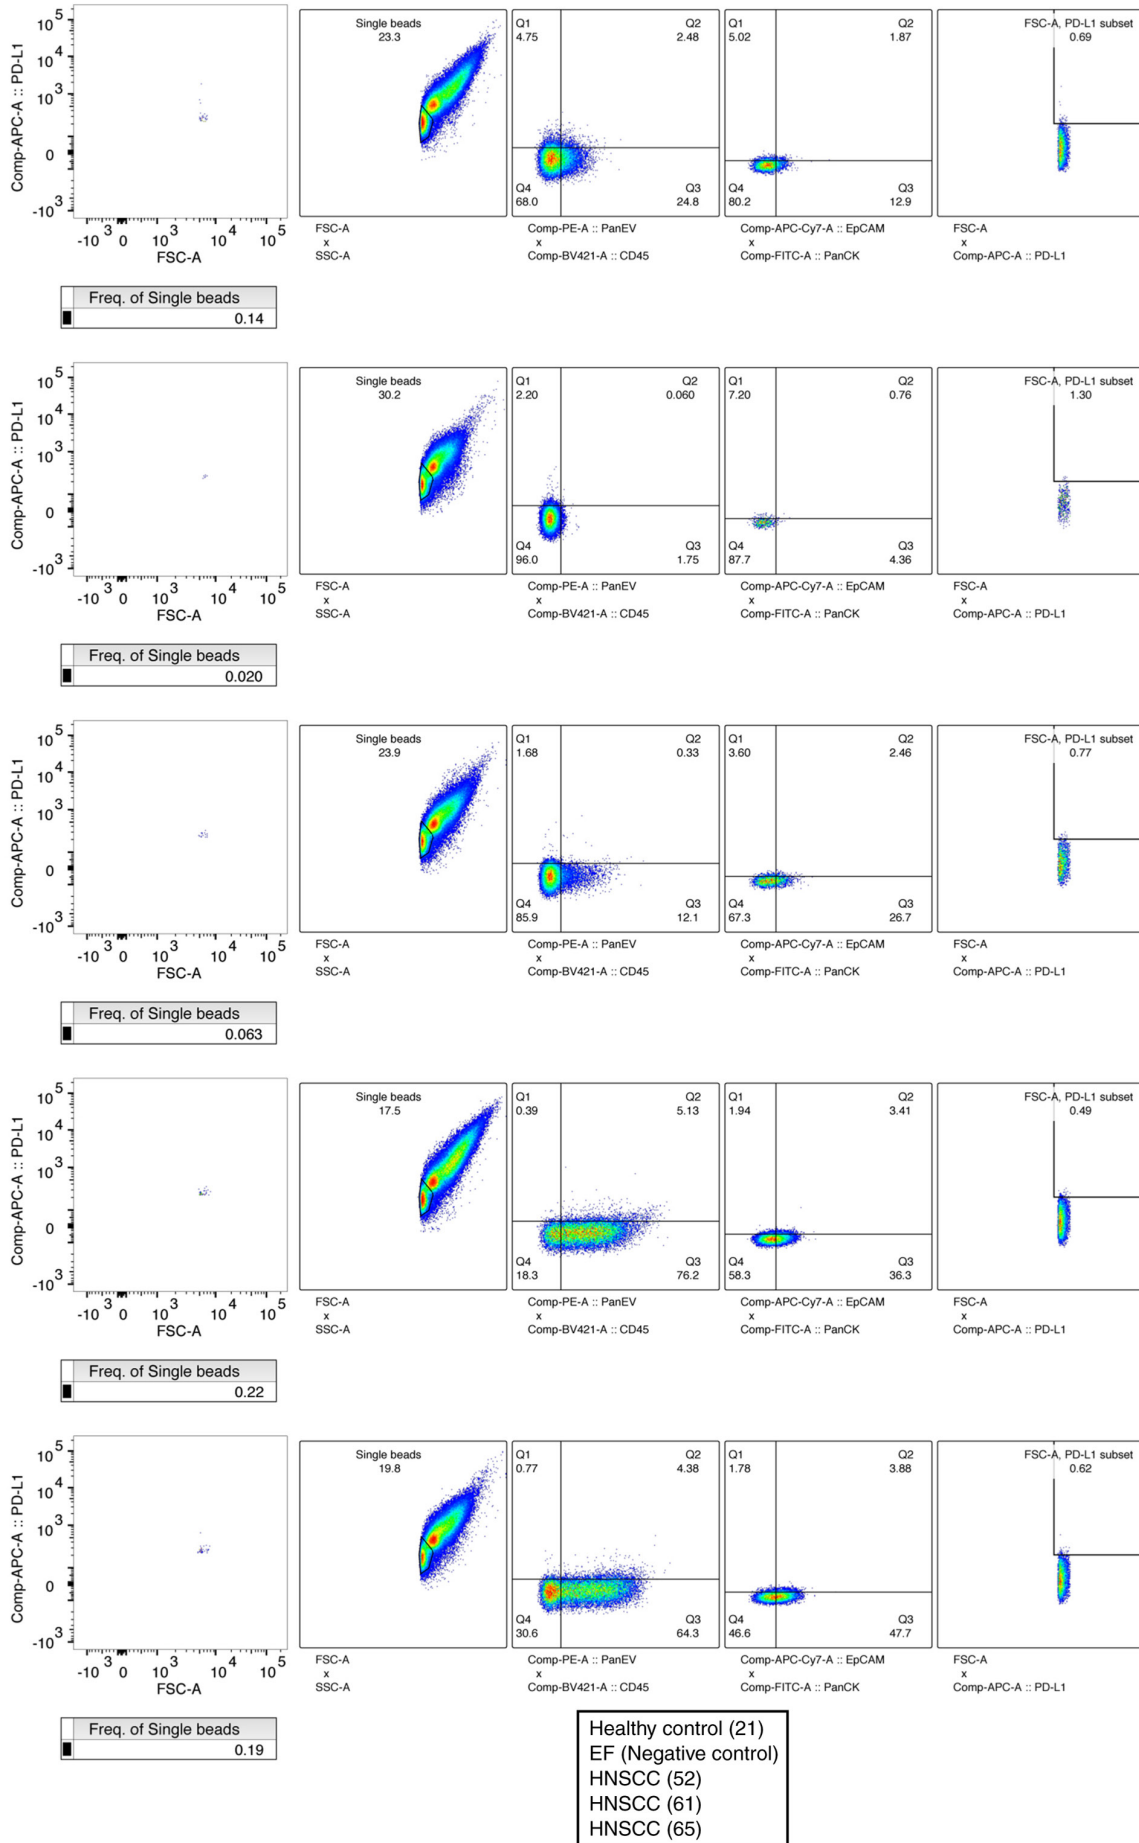

Healthy control (21)  
 EF (Negative control)  
 HNSCC (52)  
 HNSCC (61)  
 HNSCC (65)

Figure S3. Continued.

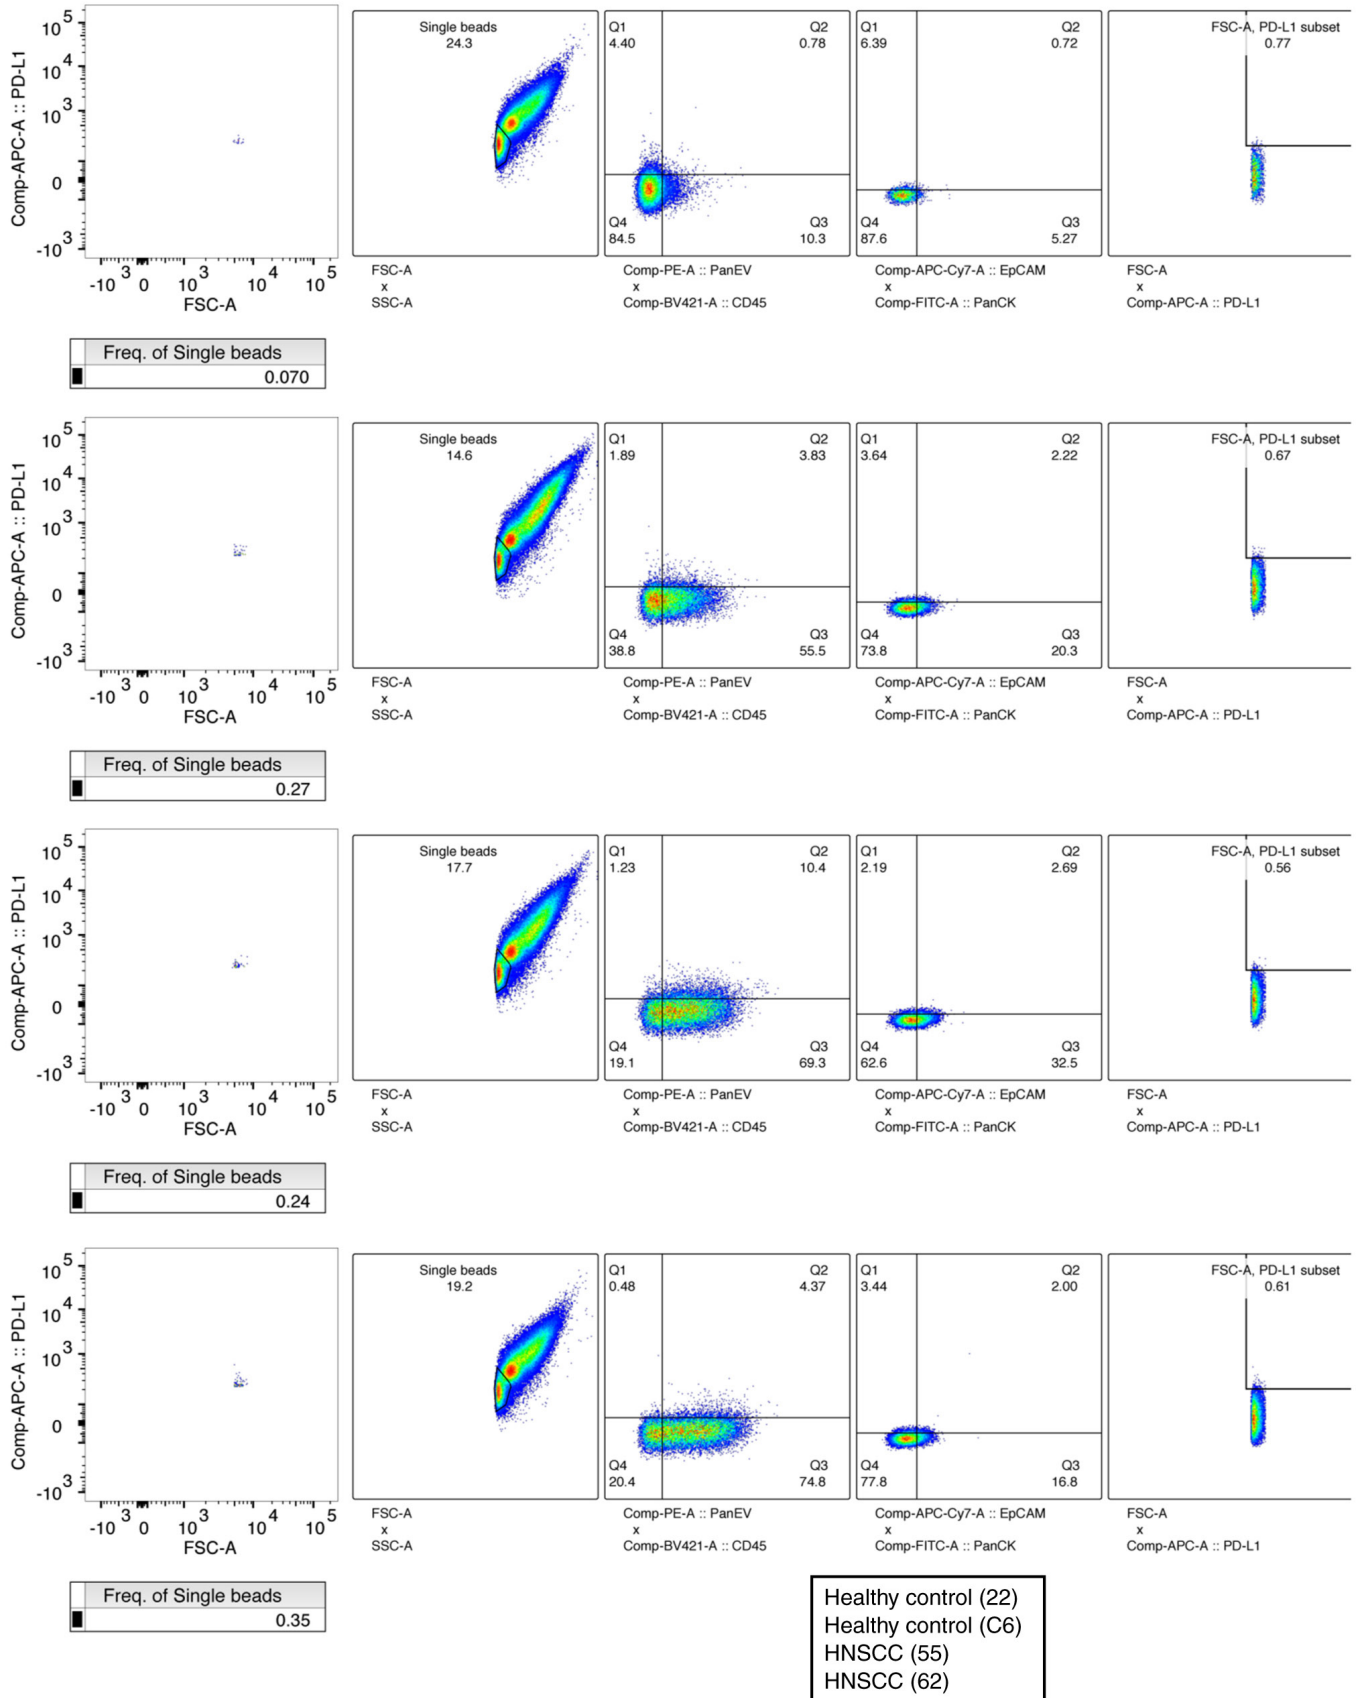



Figure S3. Continued.

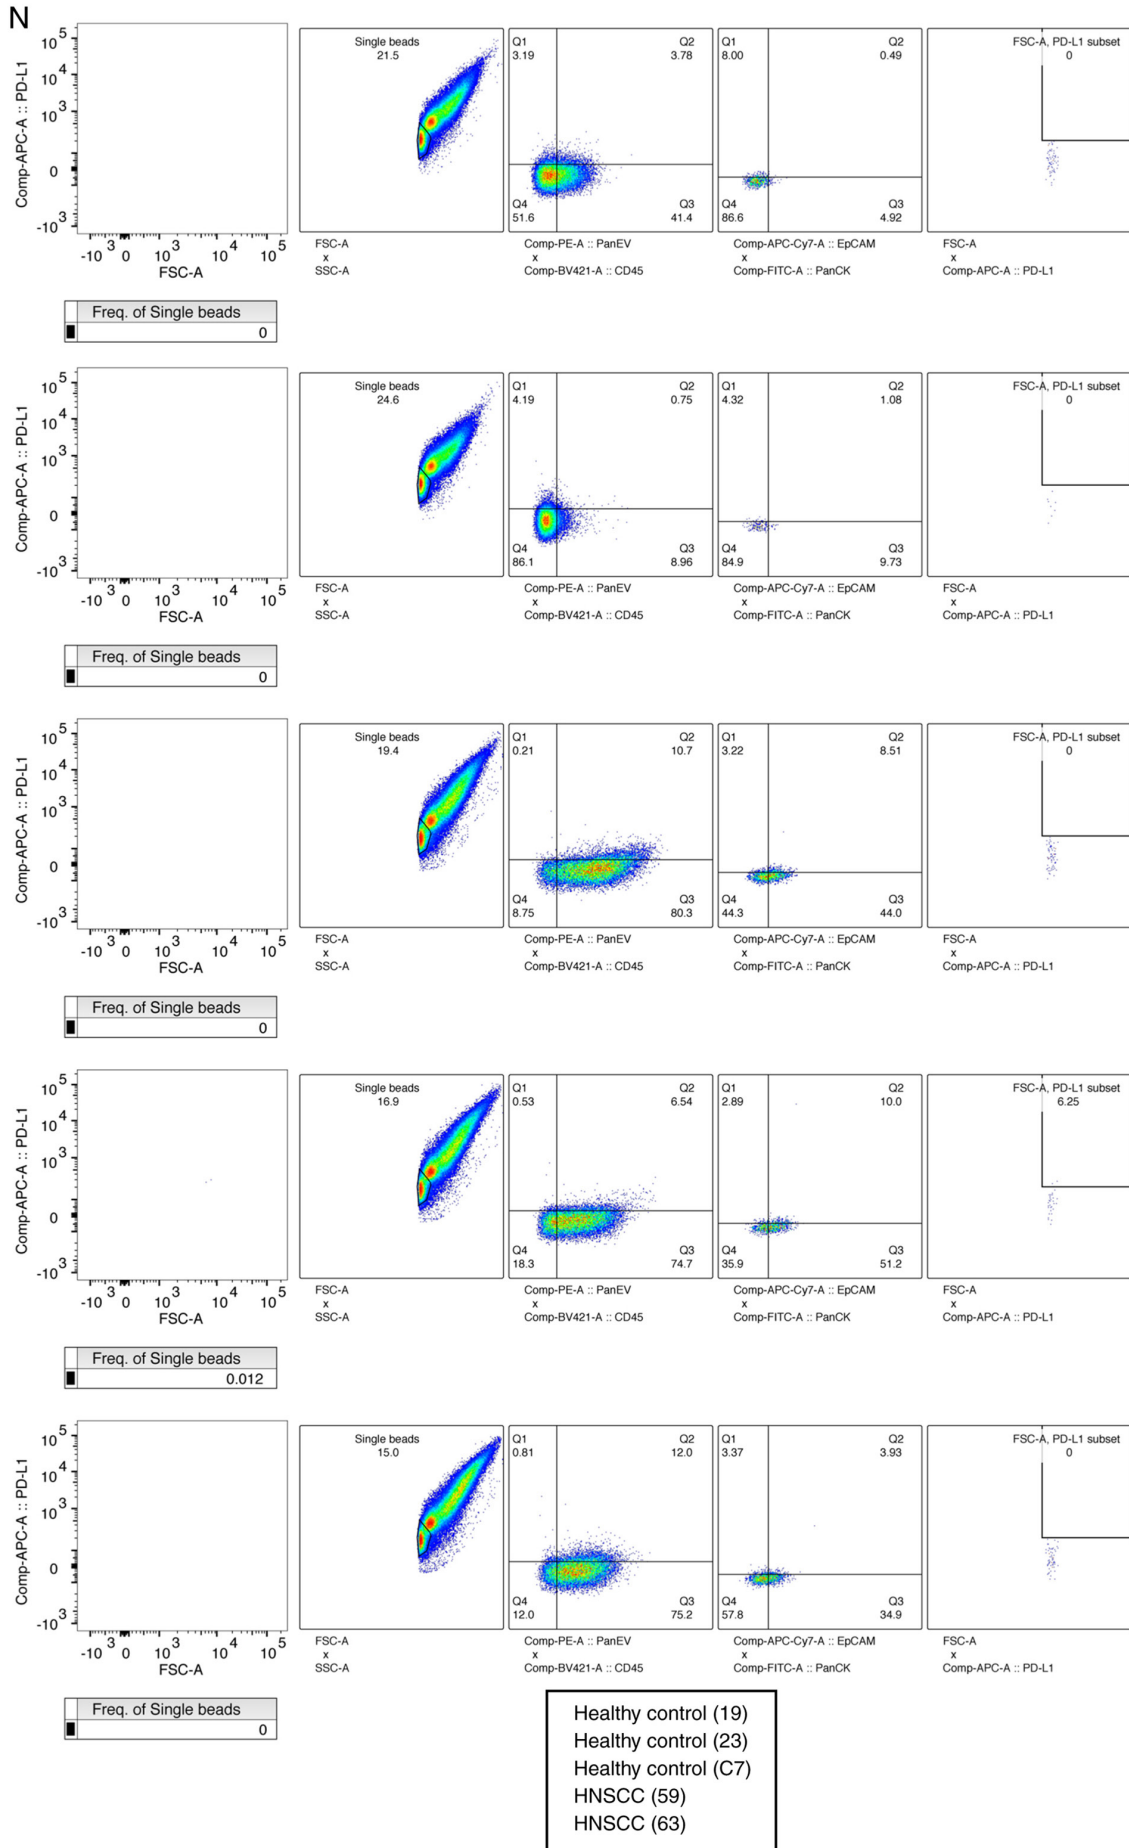

Figure S3. Continued.

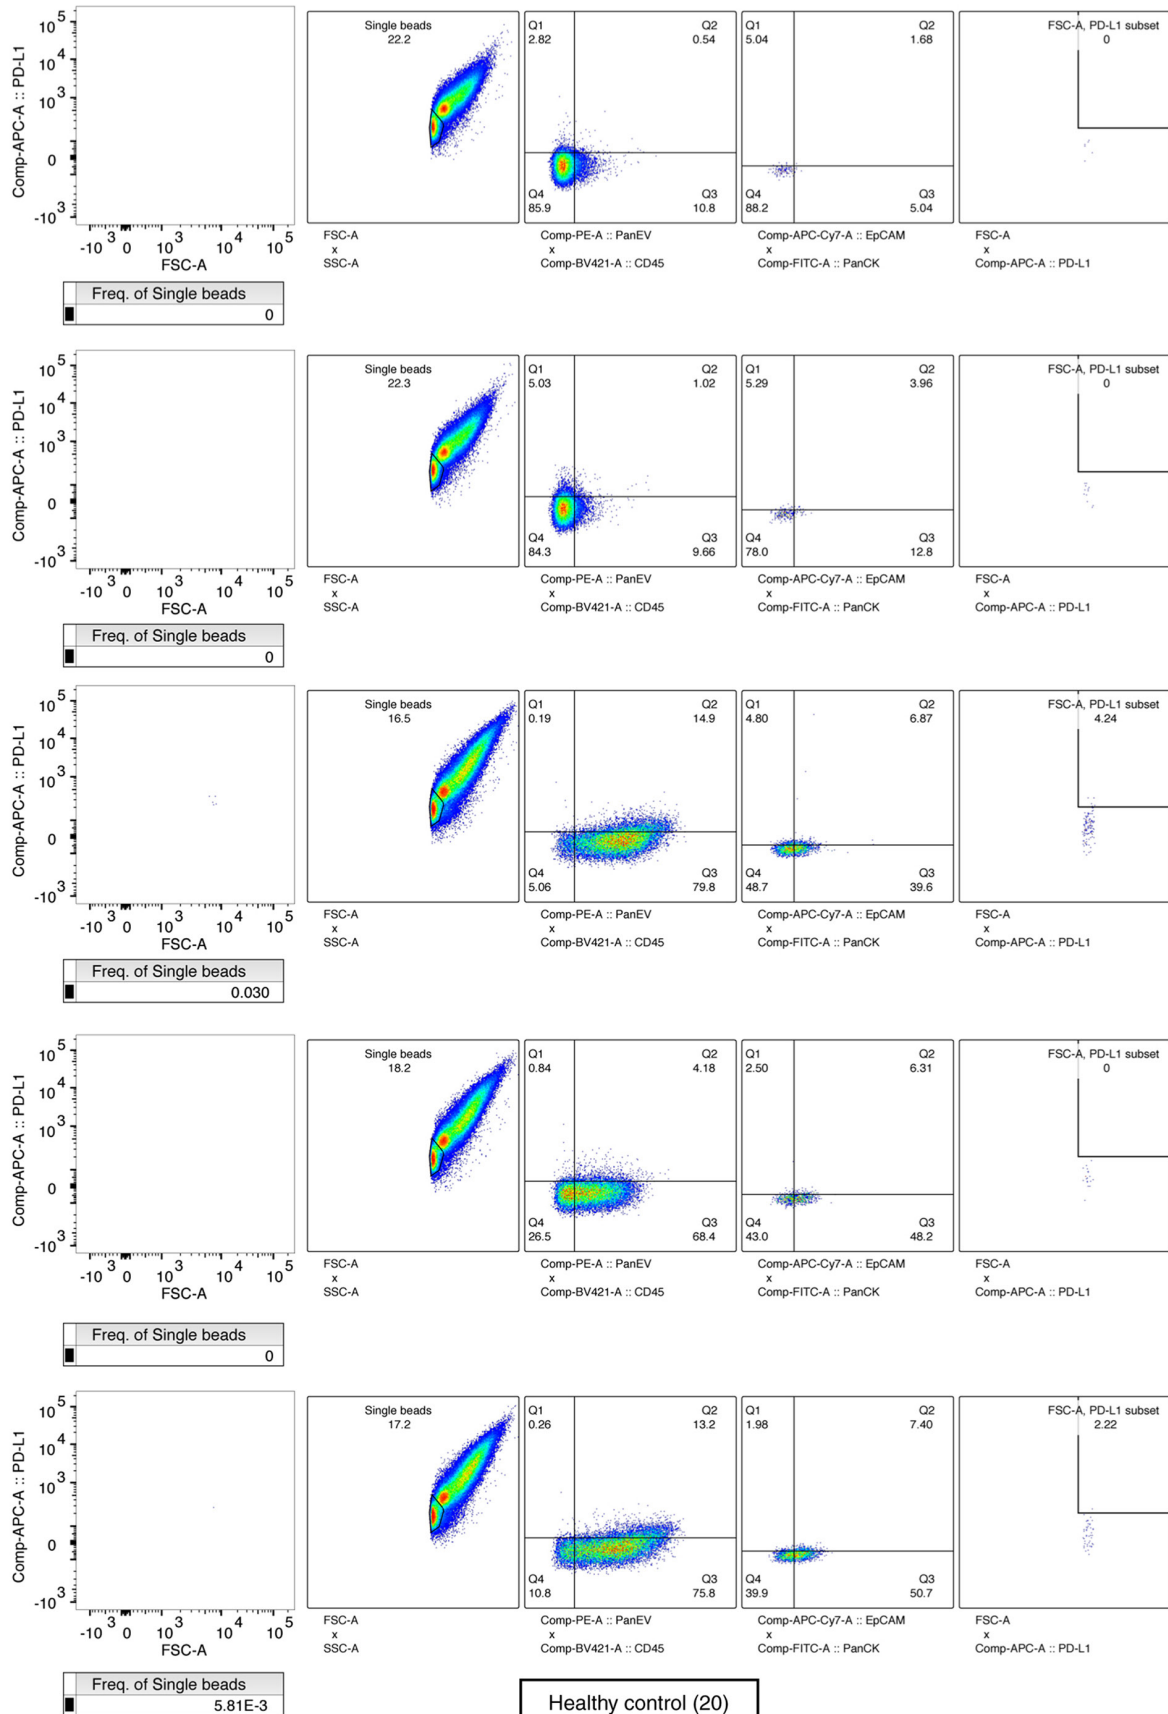

Healthy control (20)  
 Healthy control (24)  
 Healthy control (CL)  
 HNSCC (60)  
 HNSCC (64)

Figure S3. Continued.

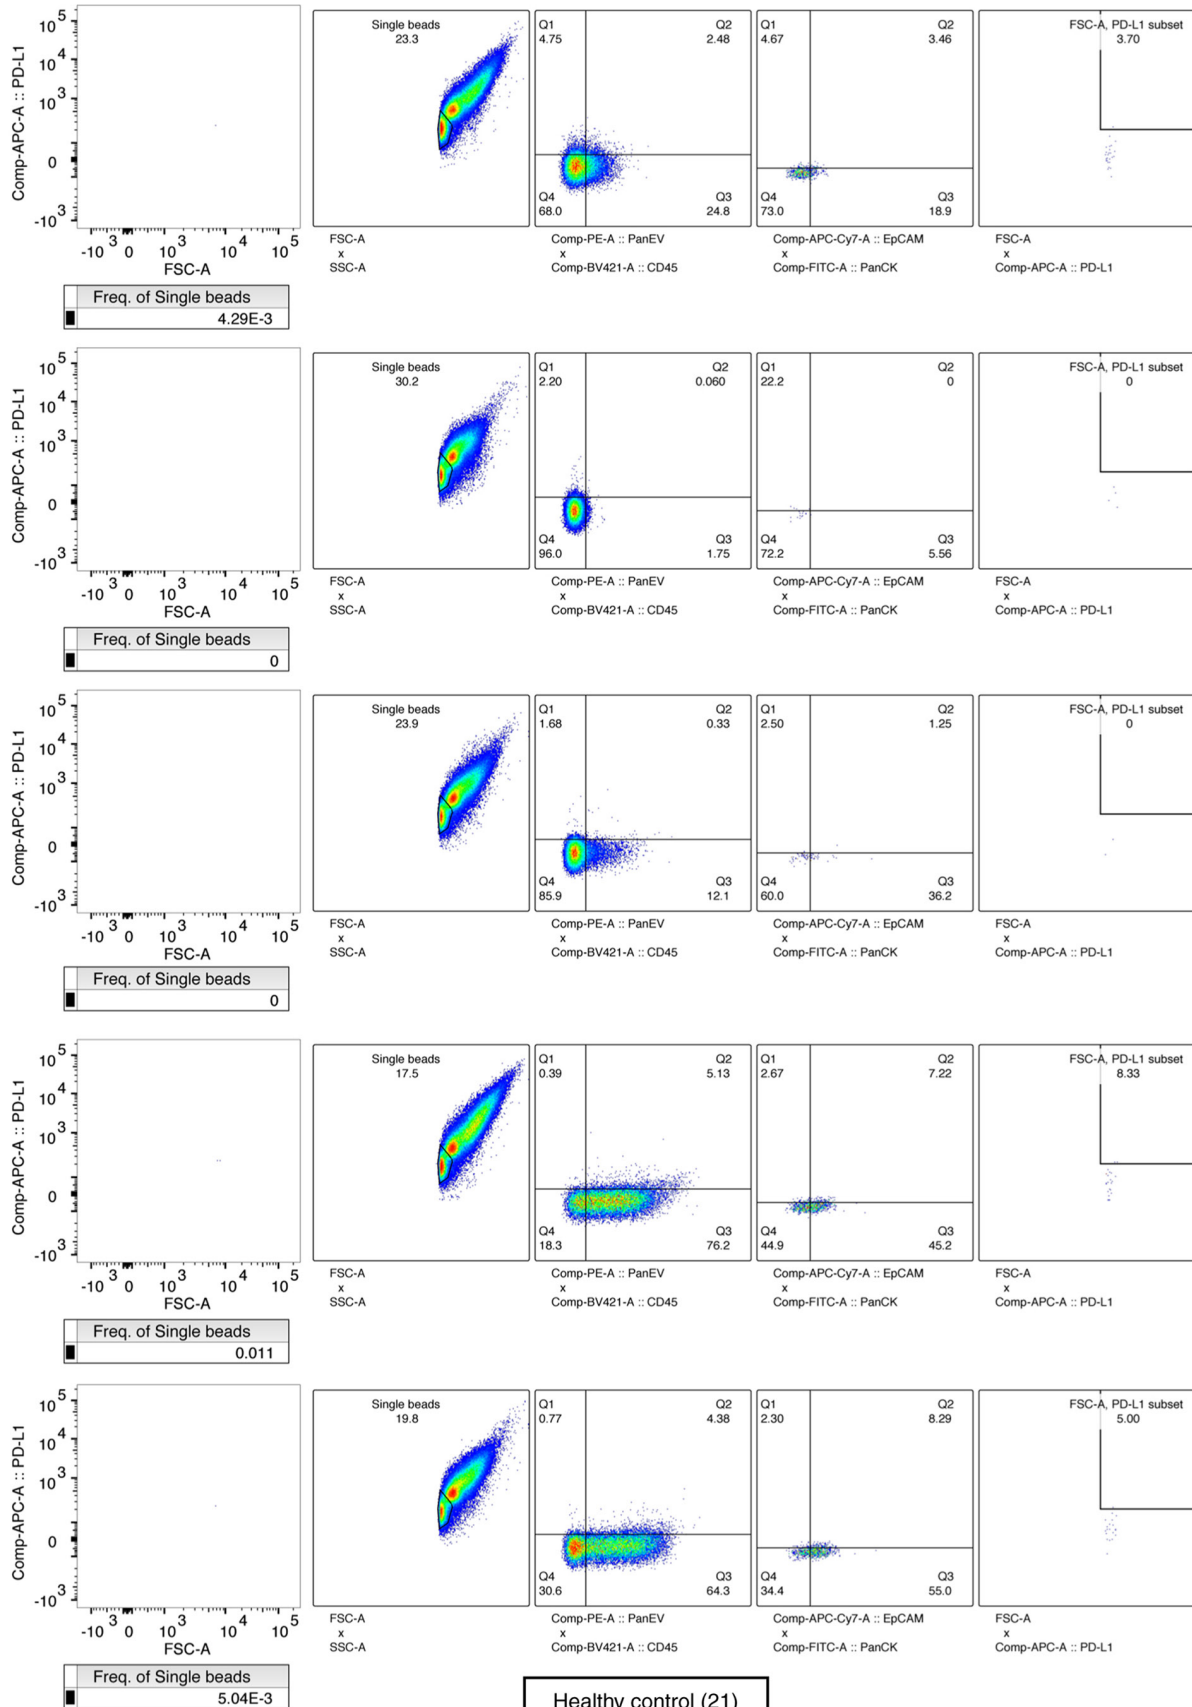

Healthy control (21)  
 EF (Negative control)  
 HNSCC (52)  
 HNSCC (61)  
 HNSCC (65)

Figure S3. Continued.

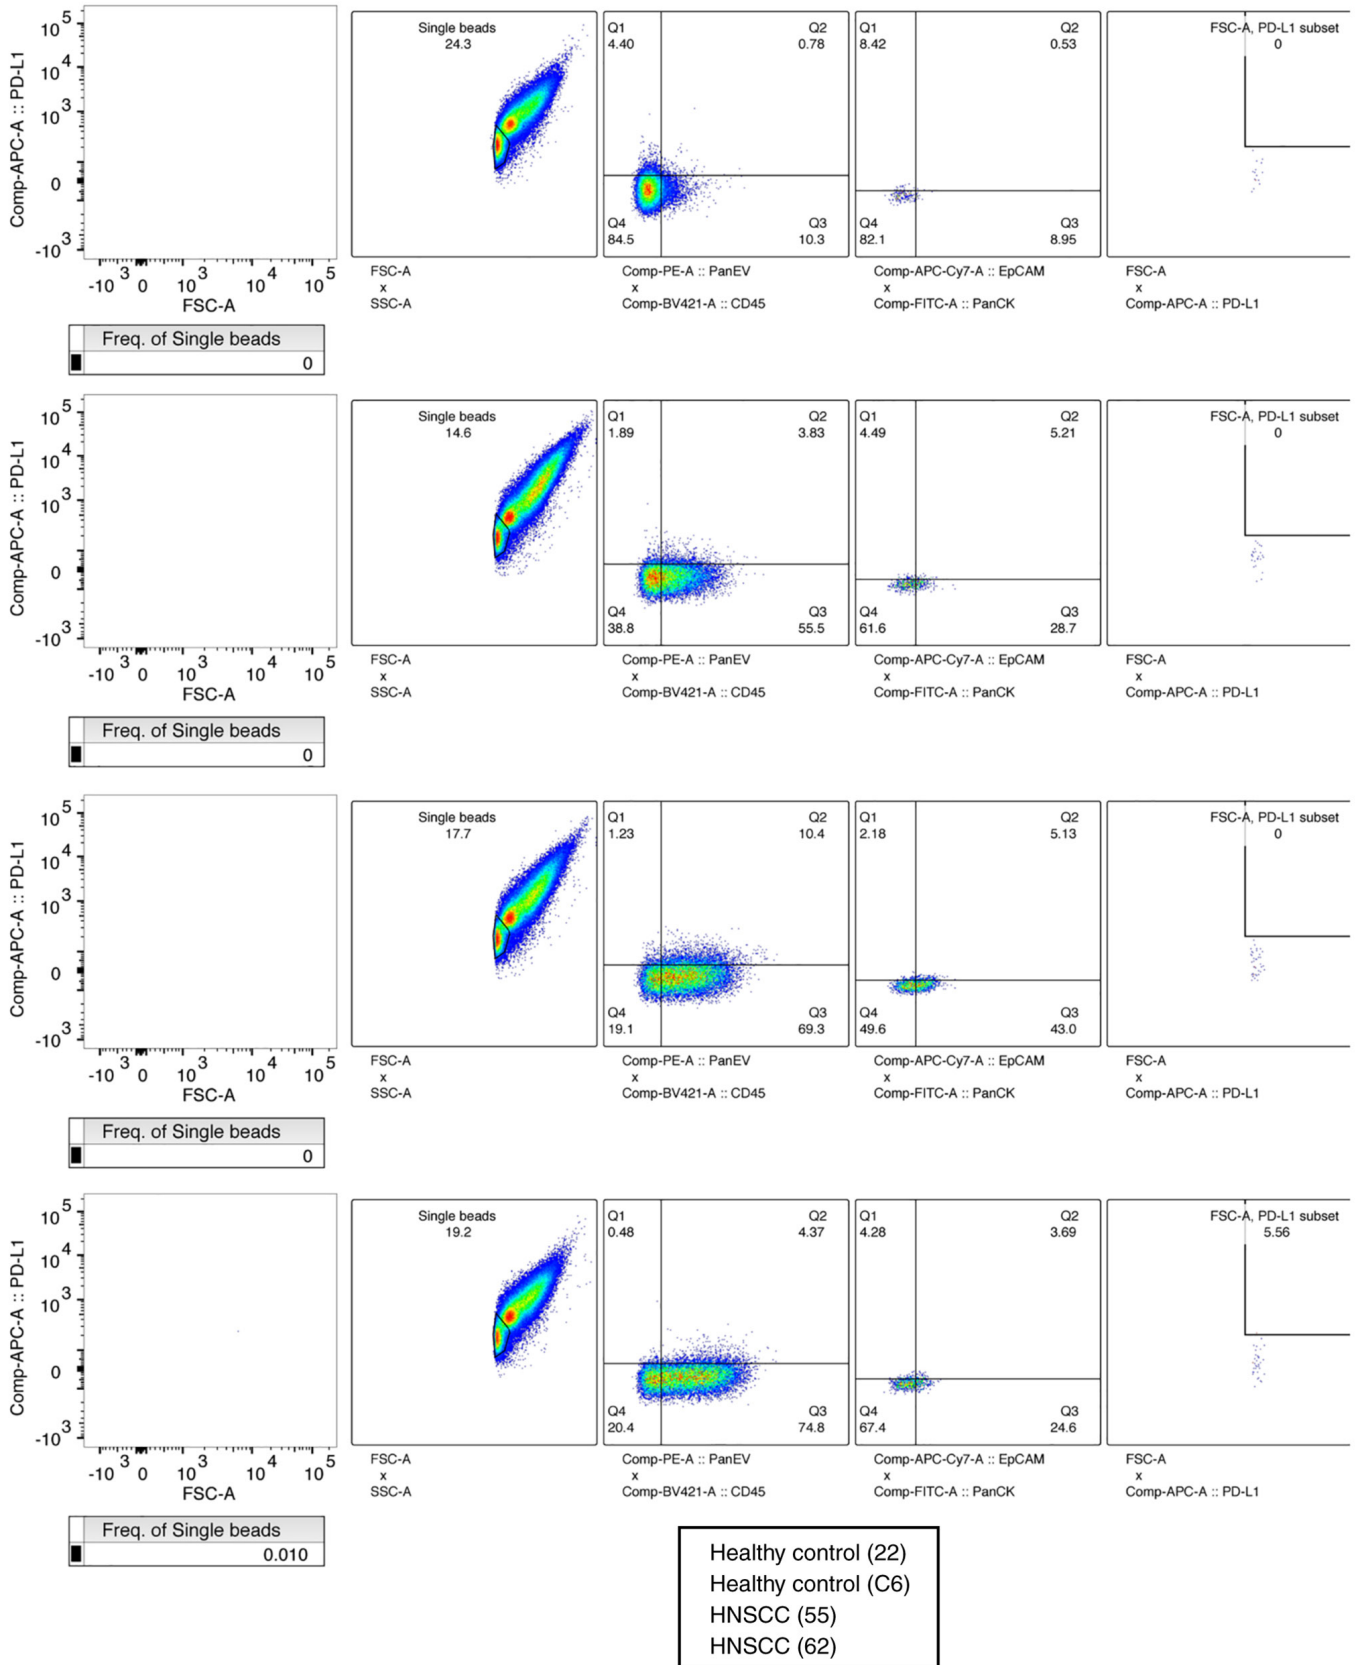

Figure S3. Continued.

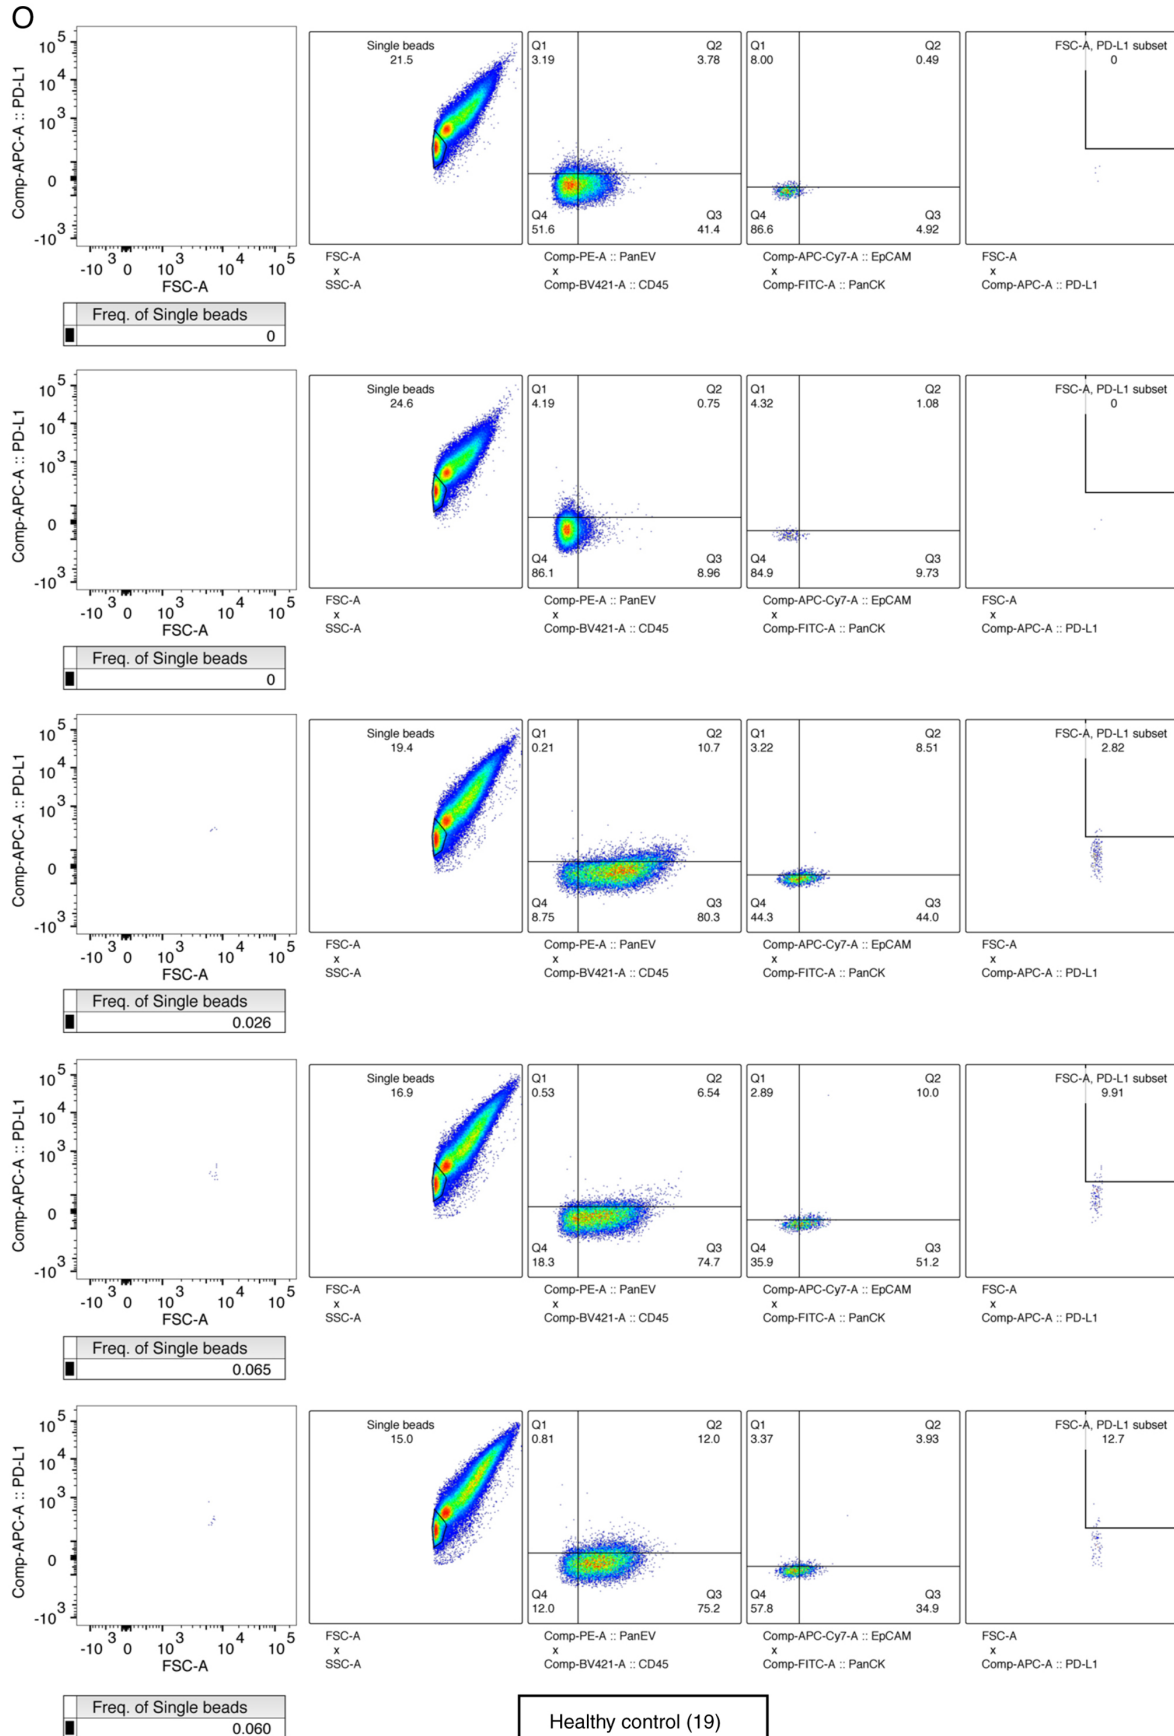

Healthy control (19)  
 Healthy control (23)  
 Healthy control (C7)  
 HNSCC (59)  
 HNSCC (63)



Figure S3. Continued.

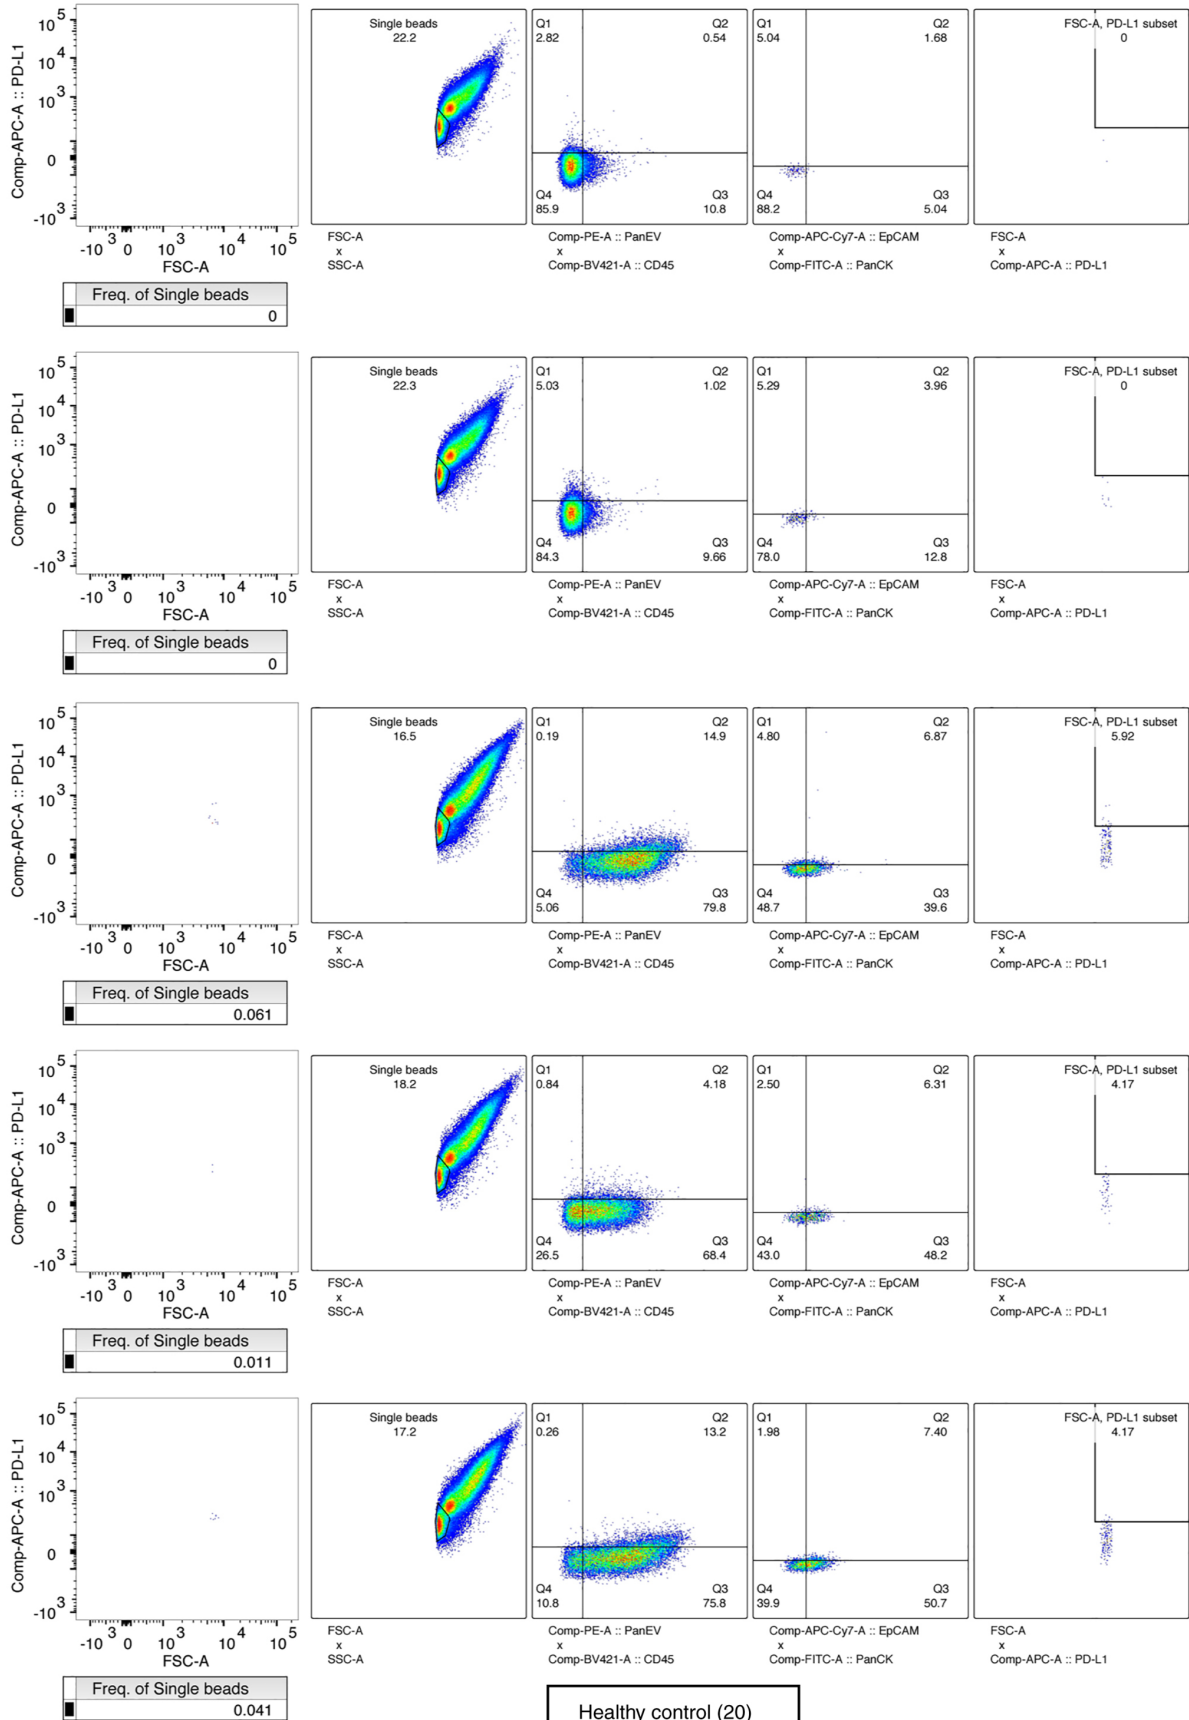

Healthy control (20)  
 Healthy control (24)  
 Healthy control (CL)  
 HNSCC (60)  
 HNSCC (64)

Figure S3. Continued.

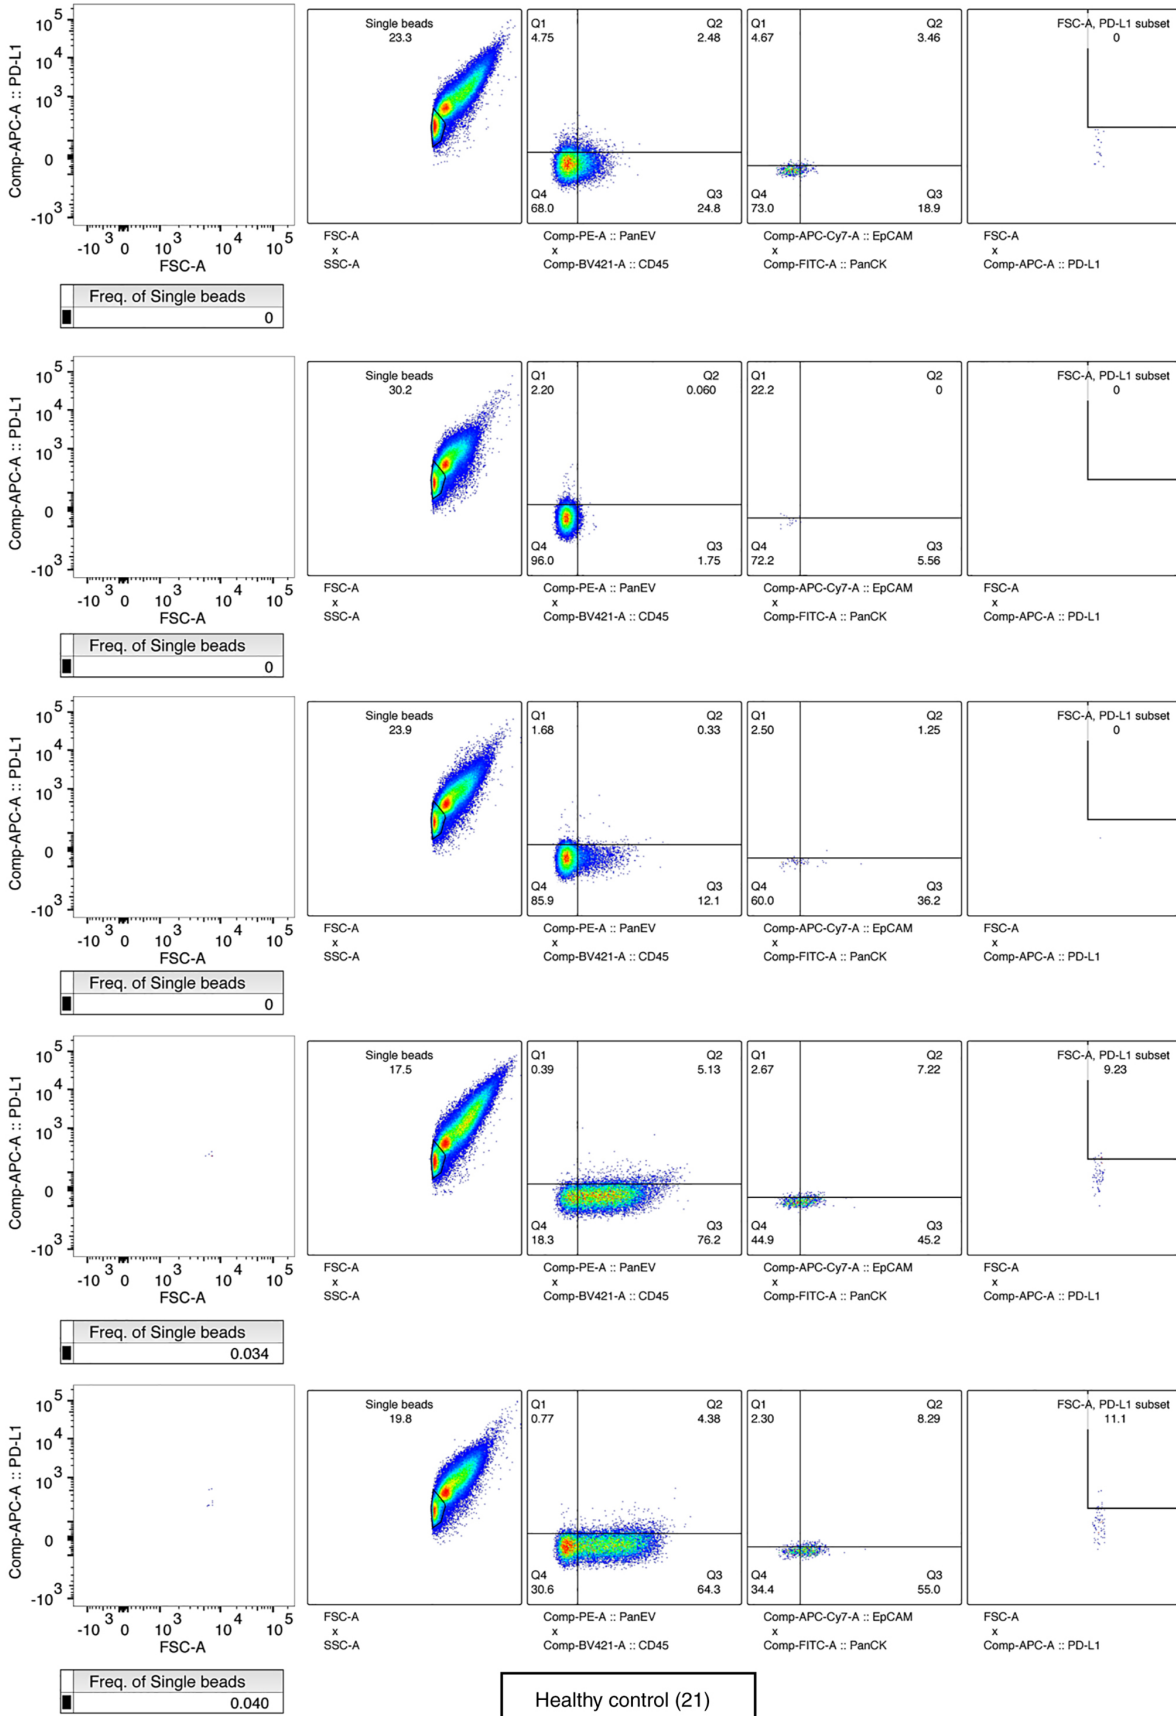

Healthy control (21)  
 EF (Negative control)  
 HNSCC (52)  
 HNSCC (61)  
 HNSCC (65)

Figure S3. Continued.

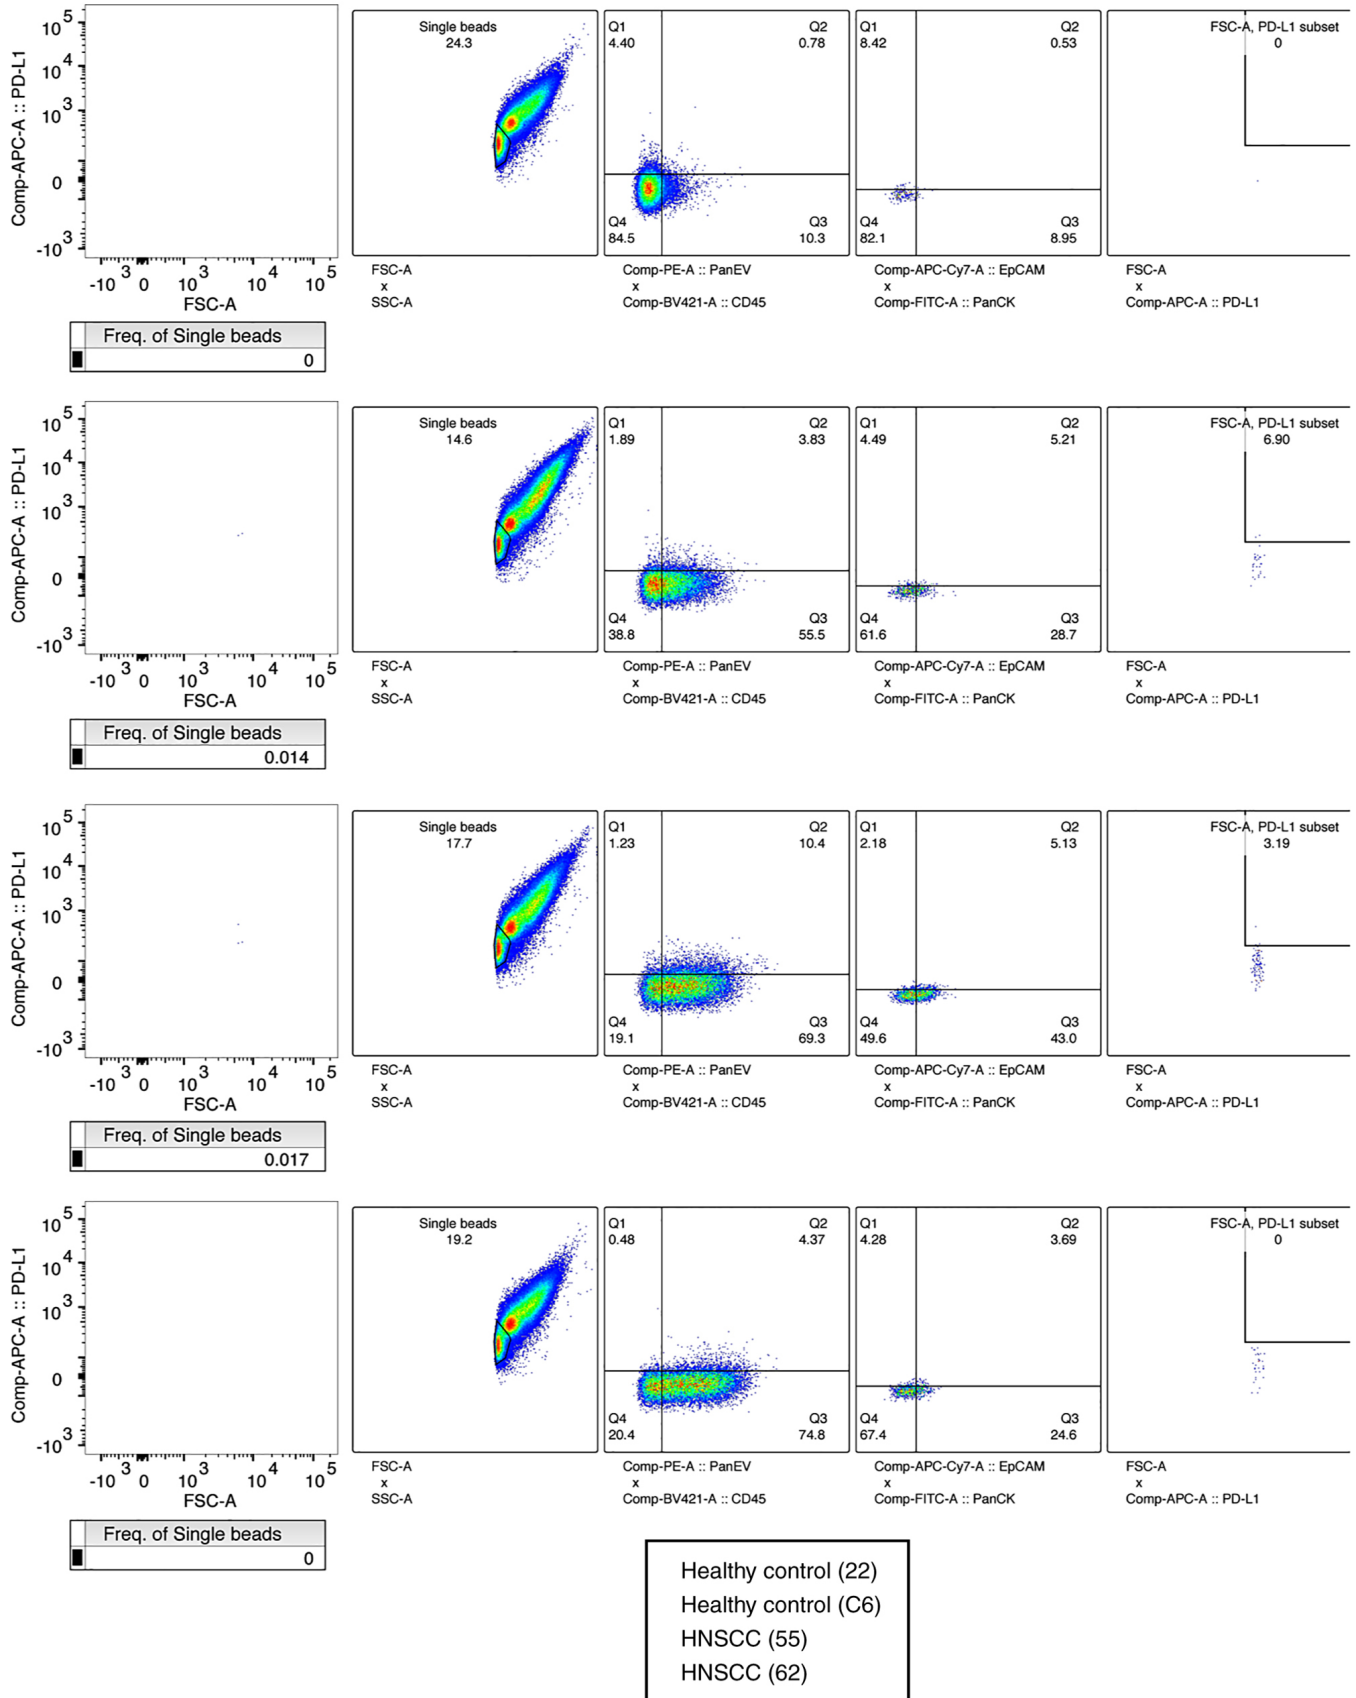

Figure S3. Continued.

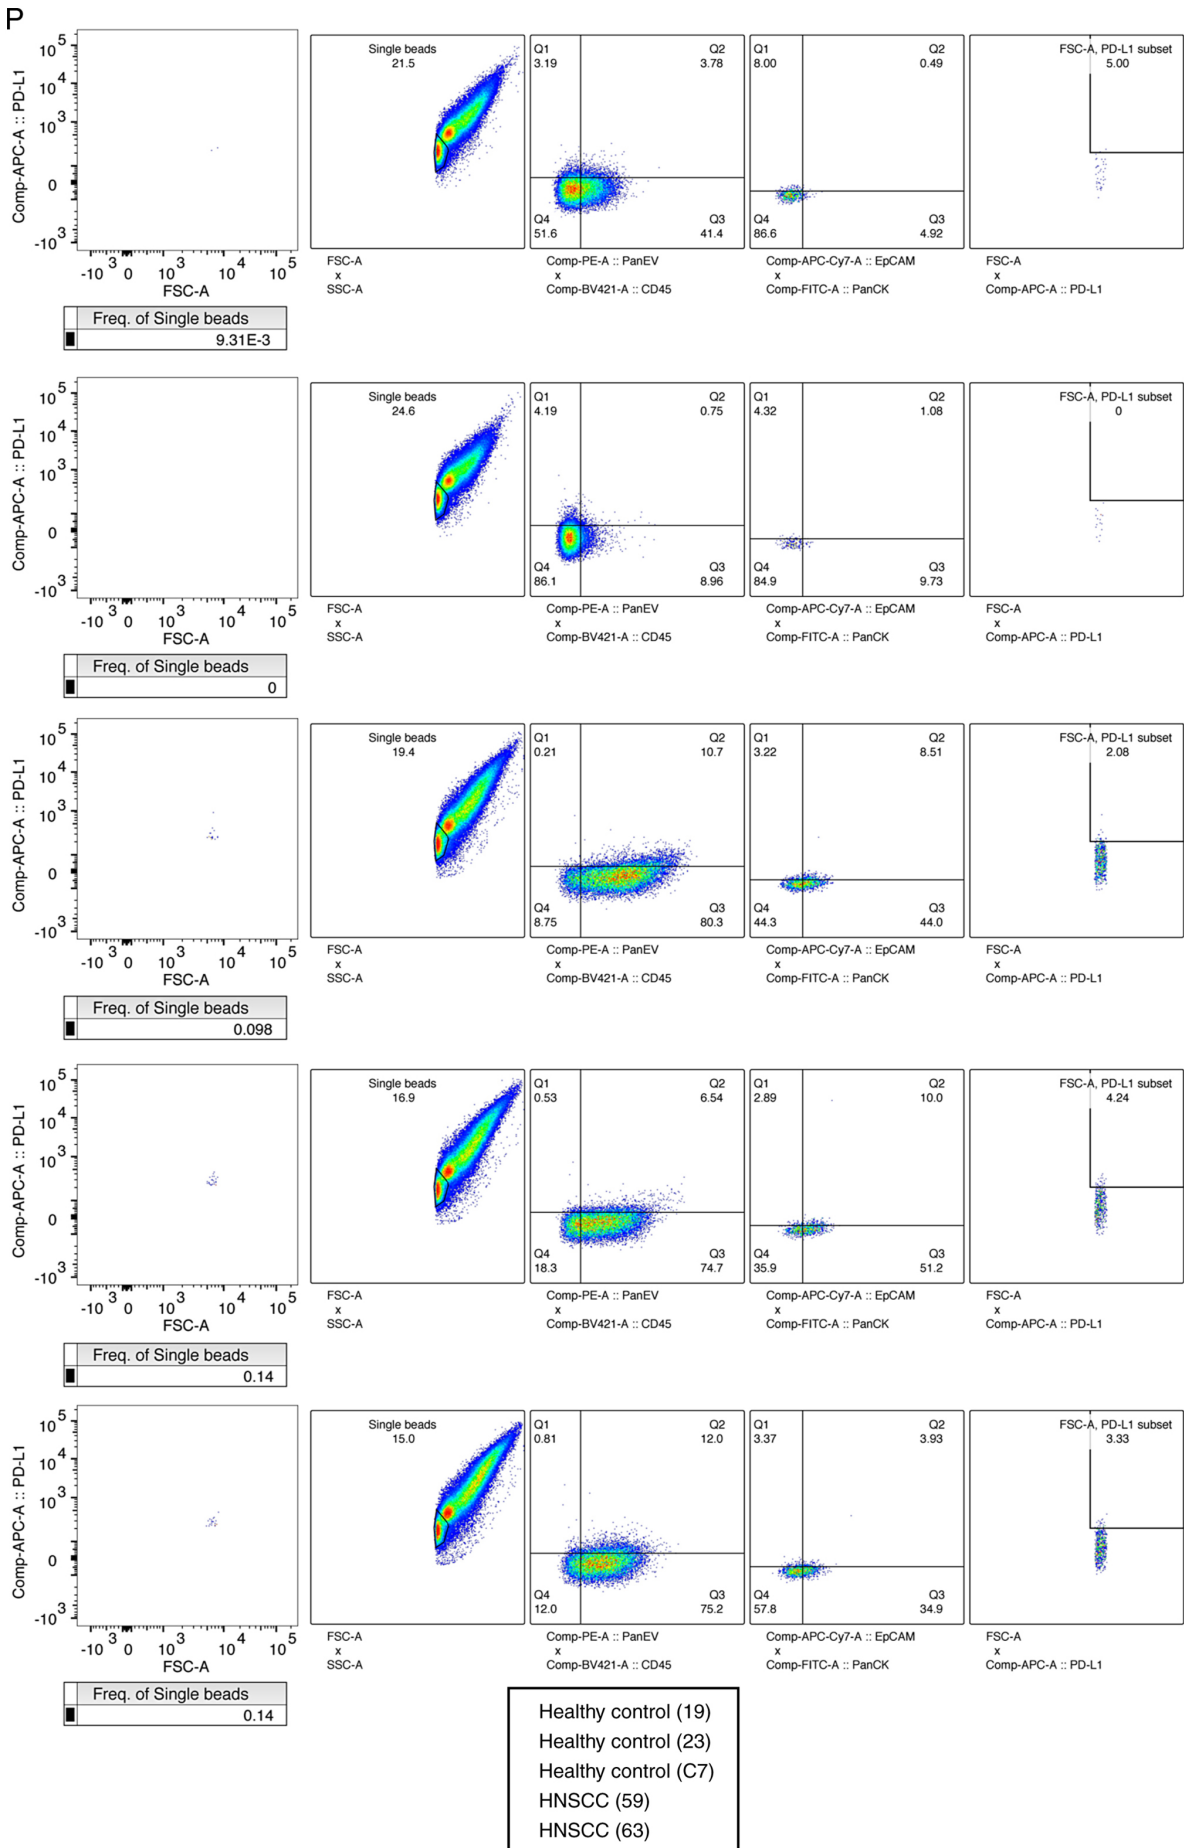

Figure S3. Continued.

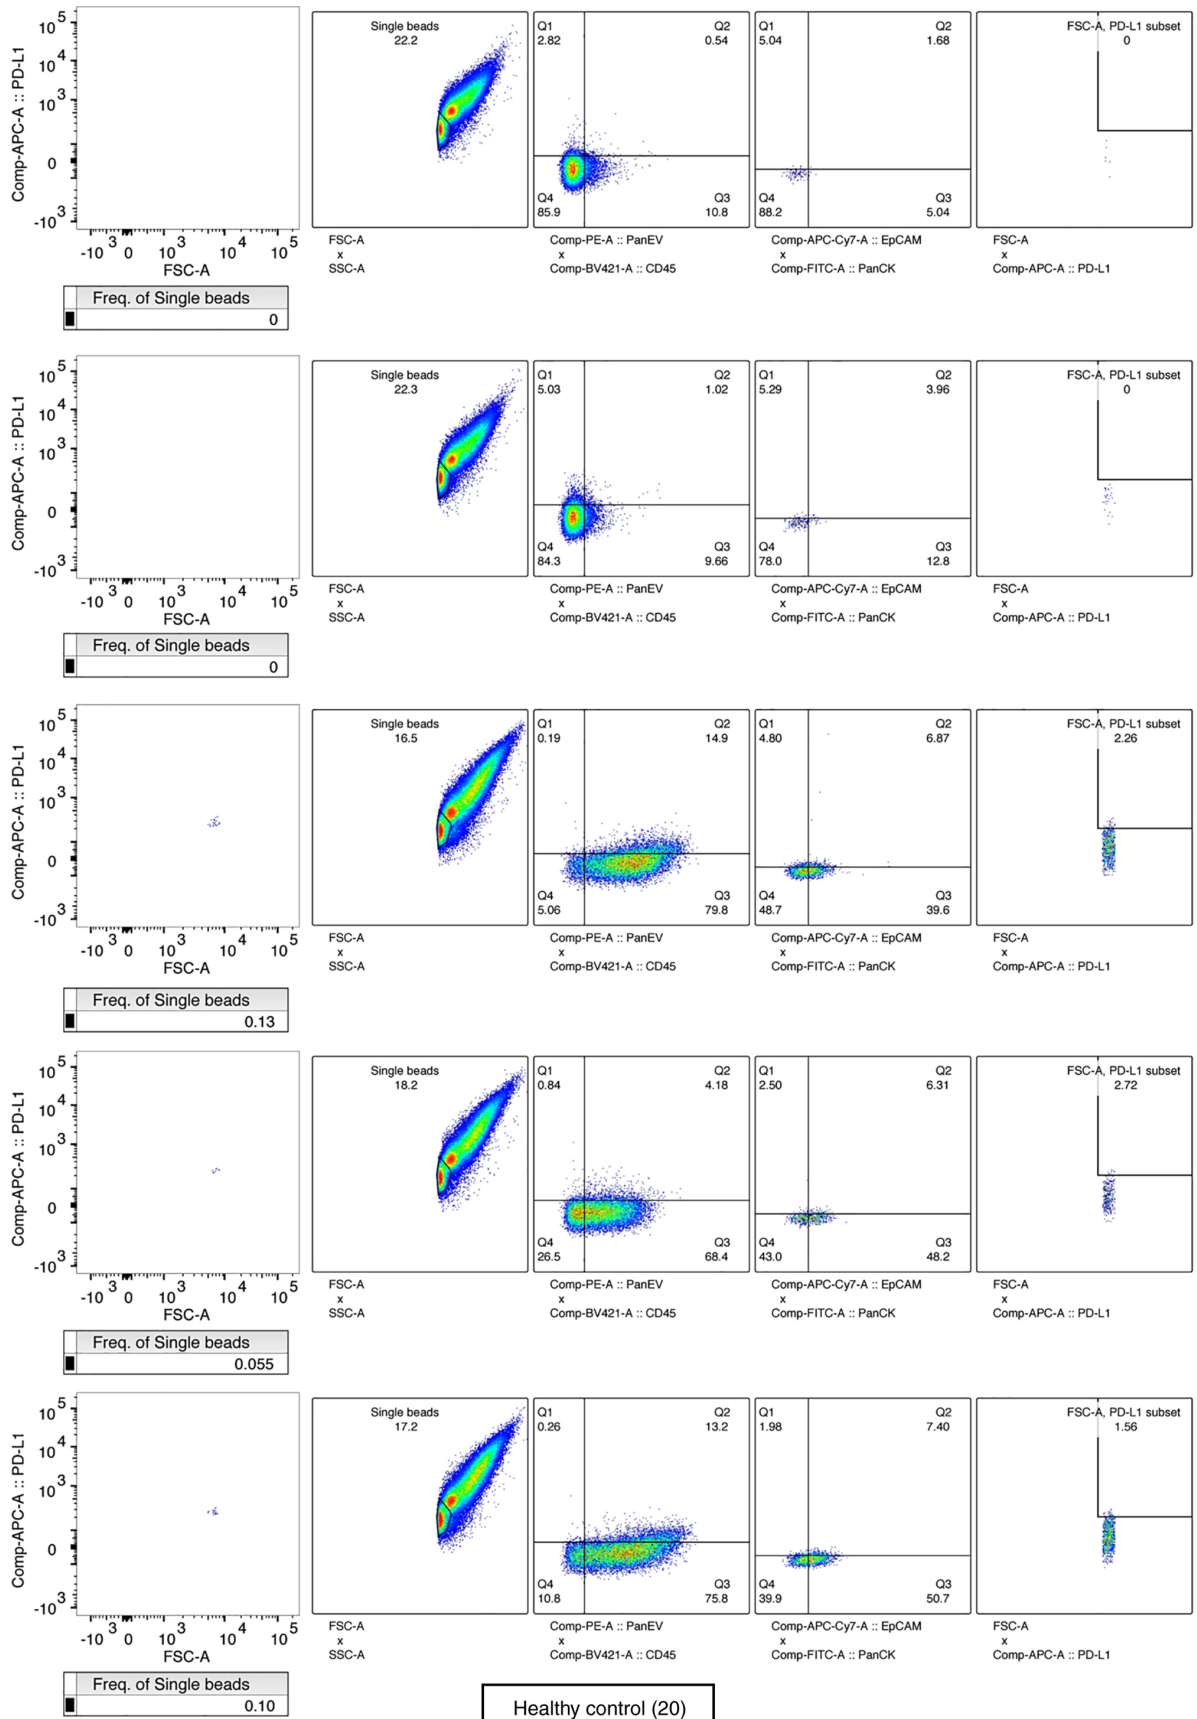



Figure S3. Continued.

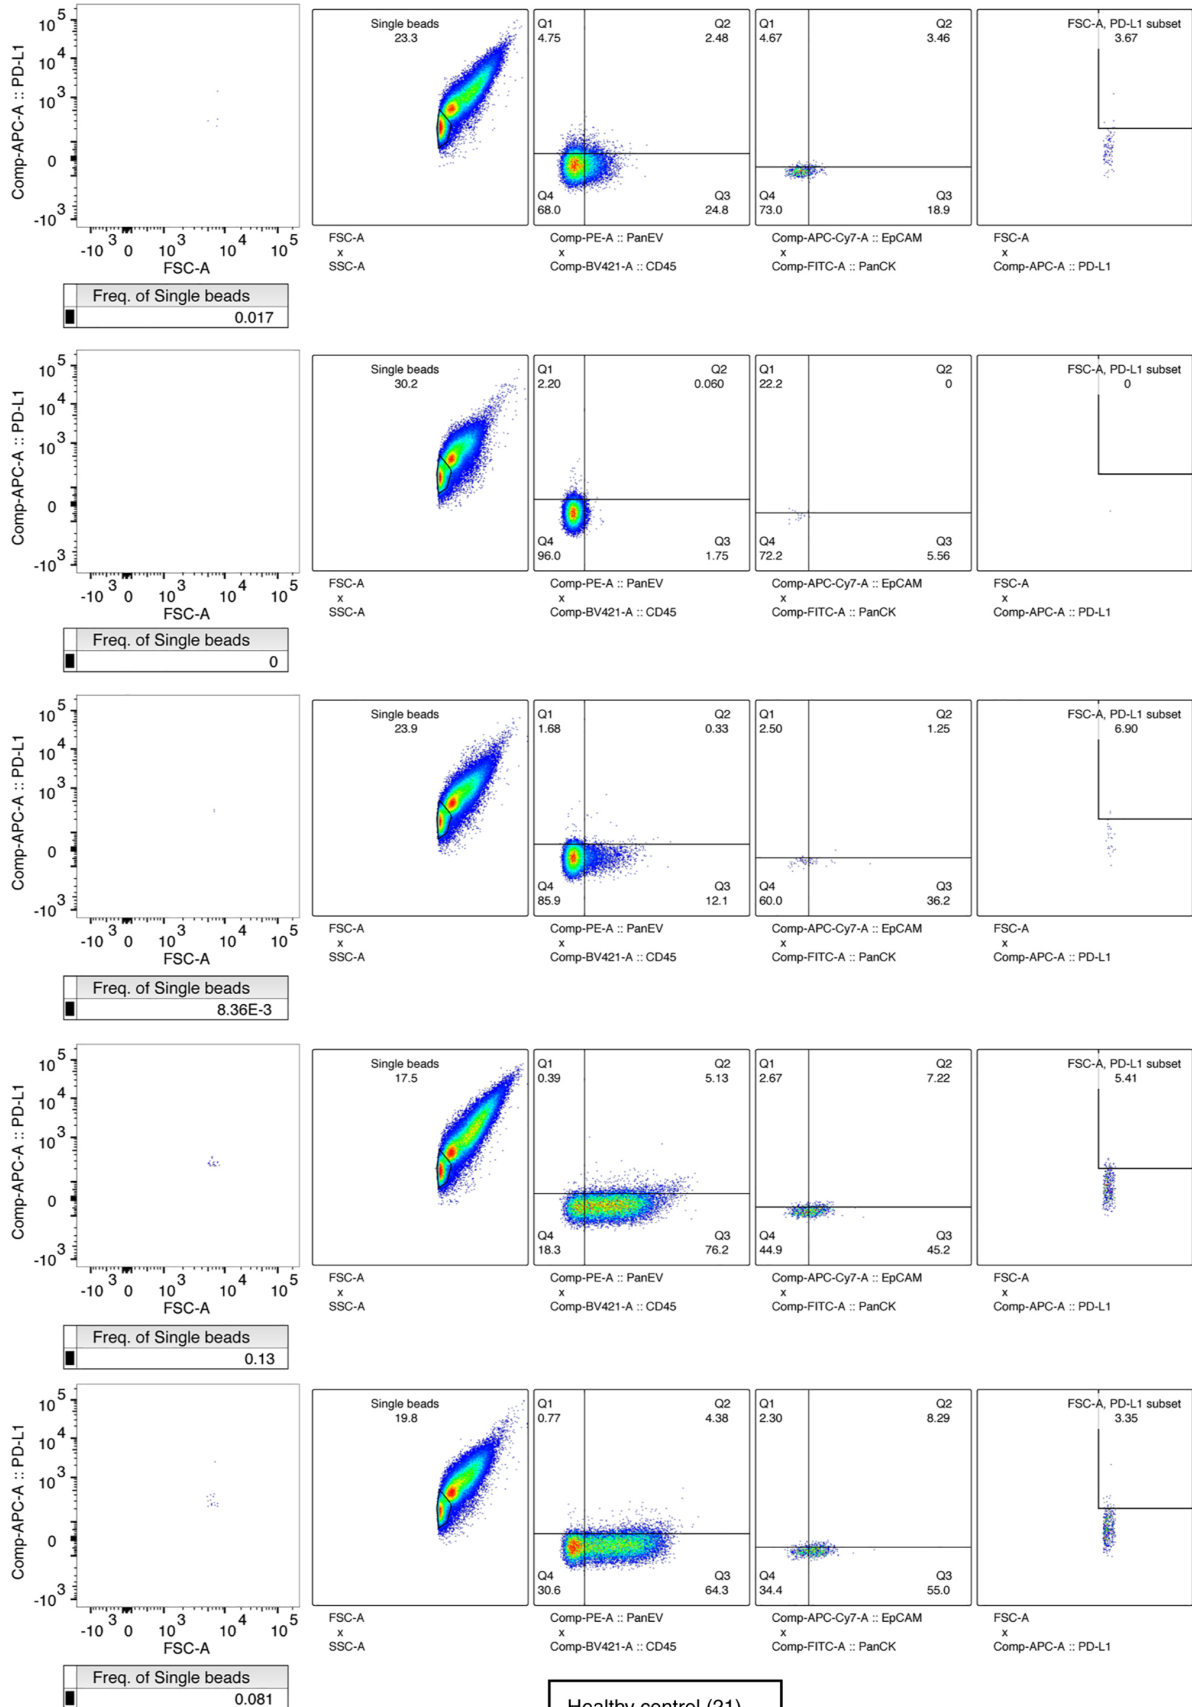

Healthy control (21)  
 EF (Negative control)  
 HNSCC (52)  
 HNSCC (61)  
 HNSCC (65)

Figure S3. Continued.

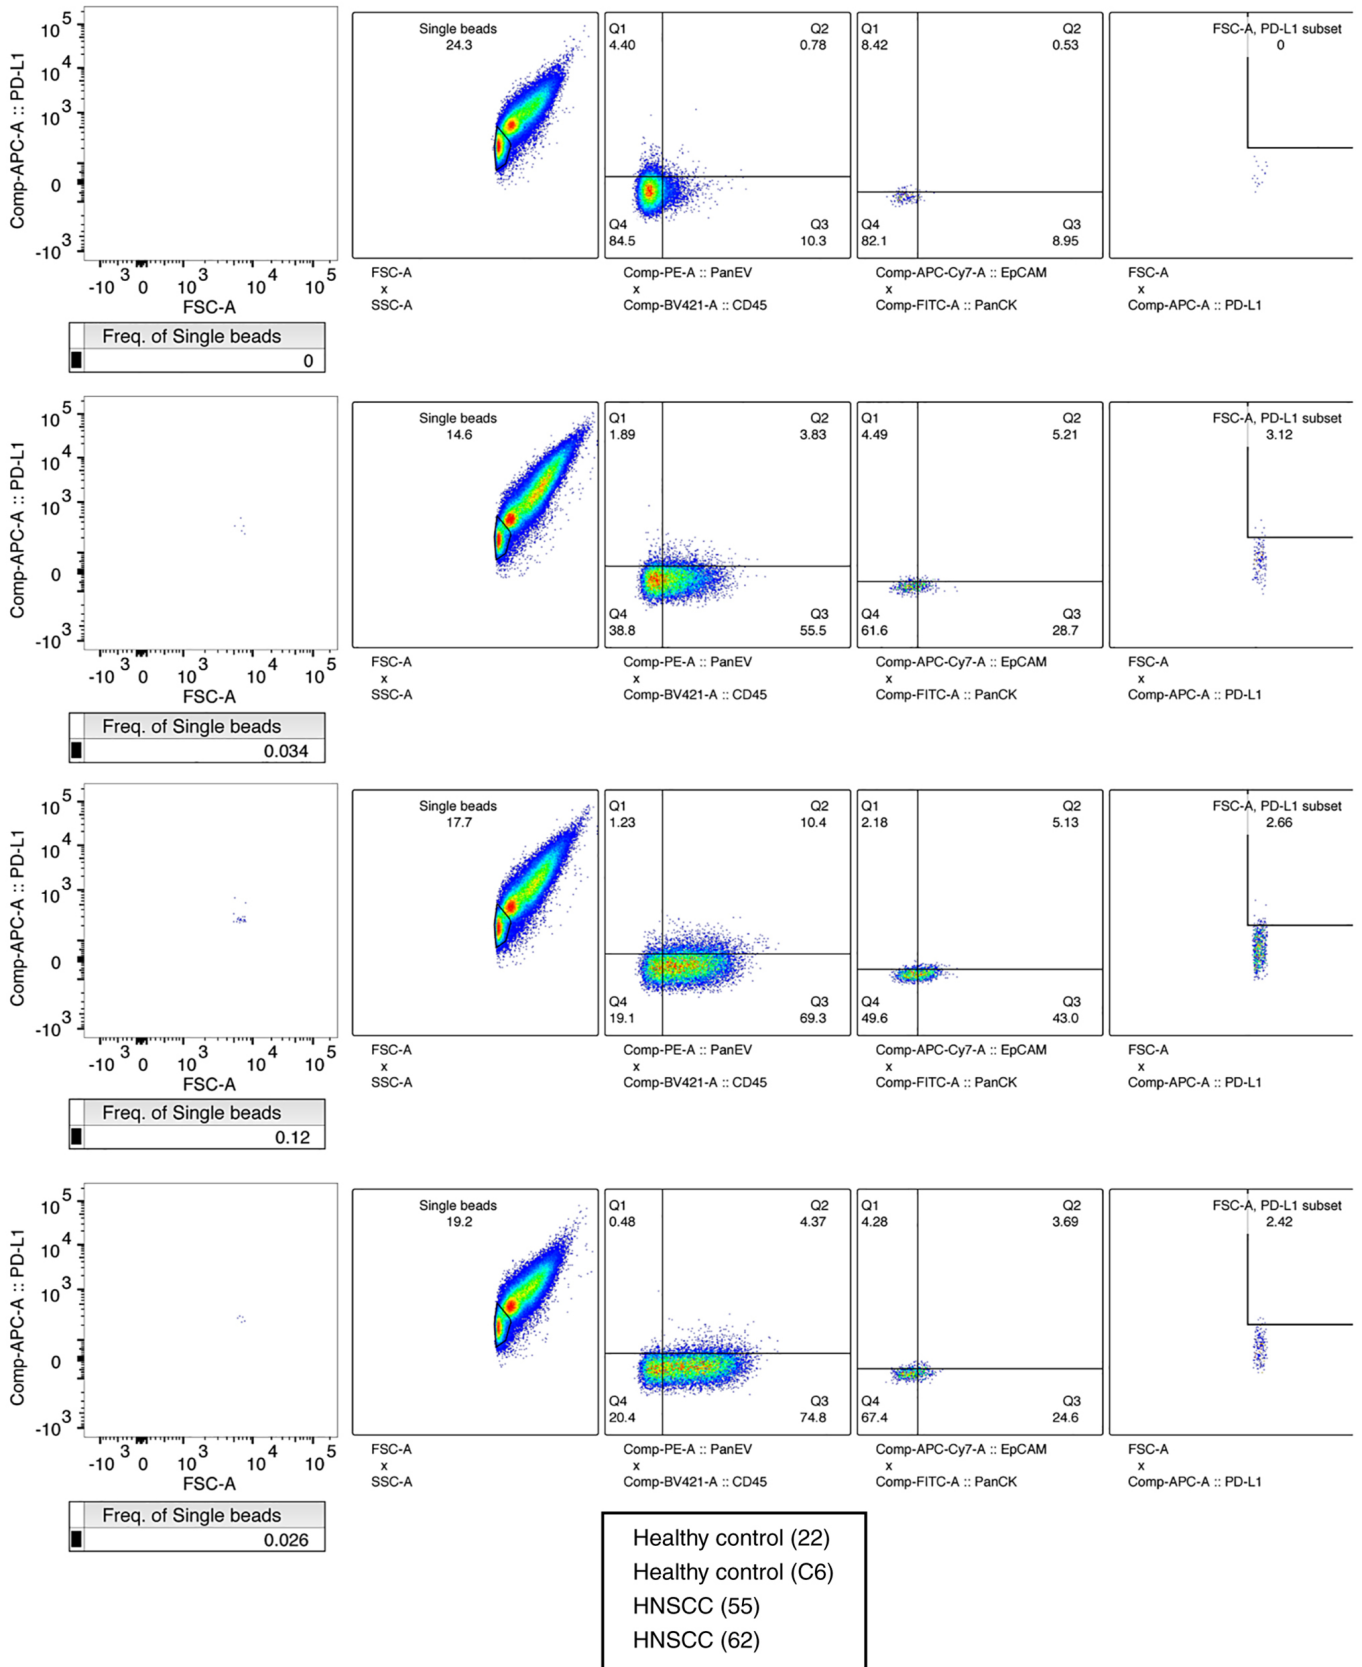

Figure S3. Continued.

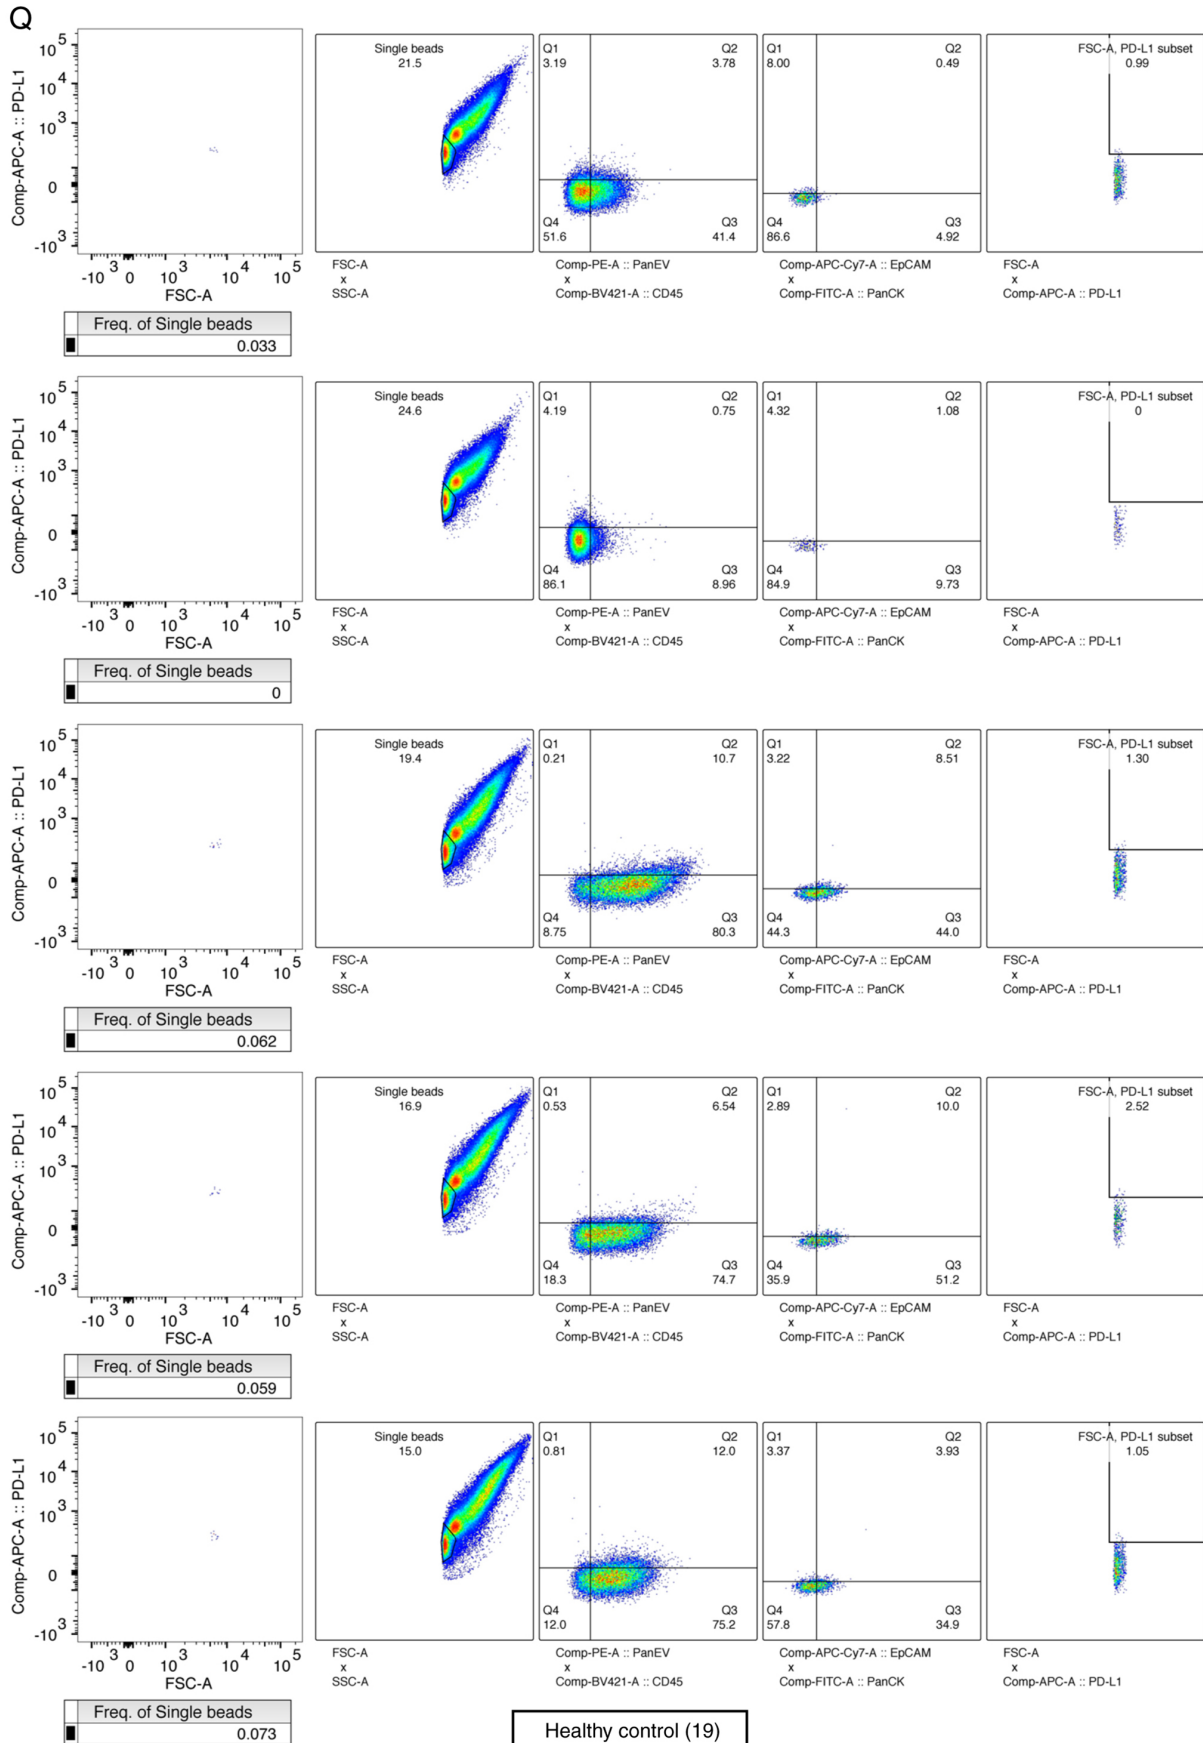

Healthy control (19)  
 Healthy control (23)  
 Healthy control (C7)  
 HNSCC (59)  
 HNSCC (63)

Figure S3. Continued.

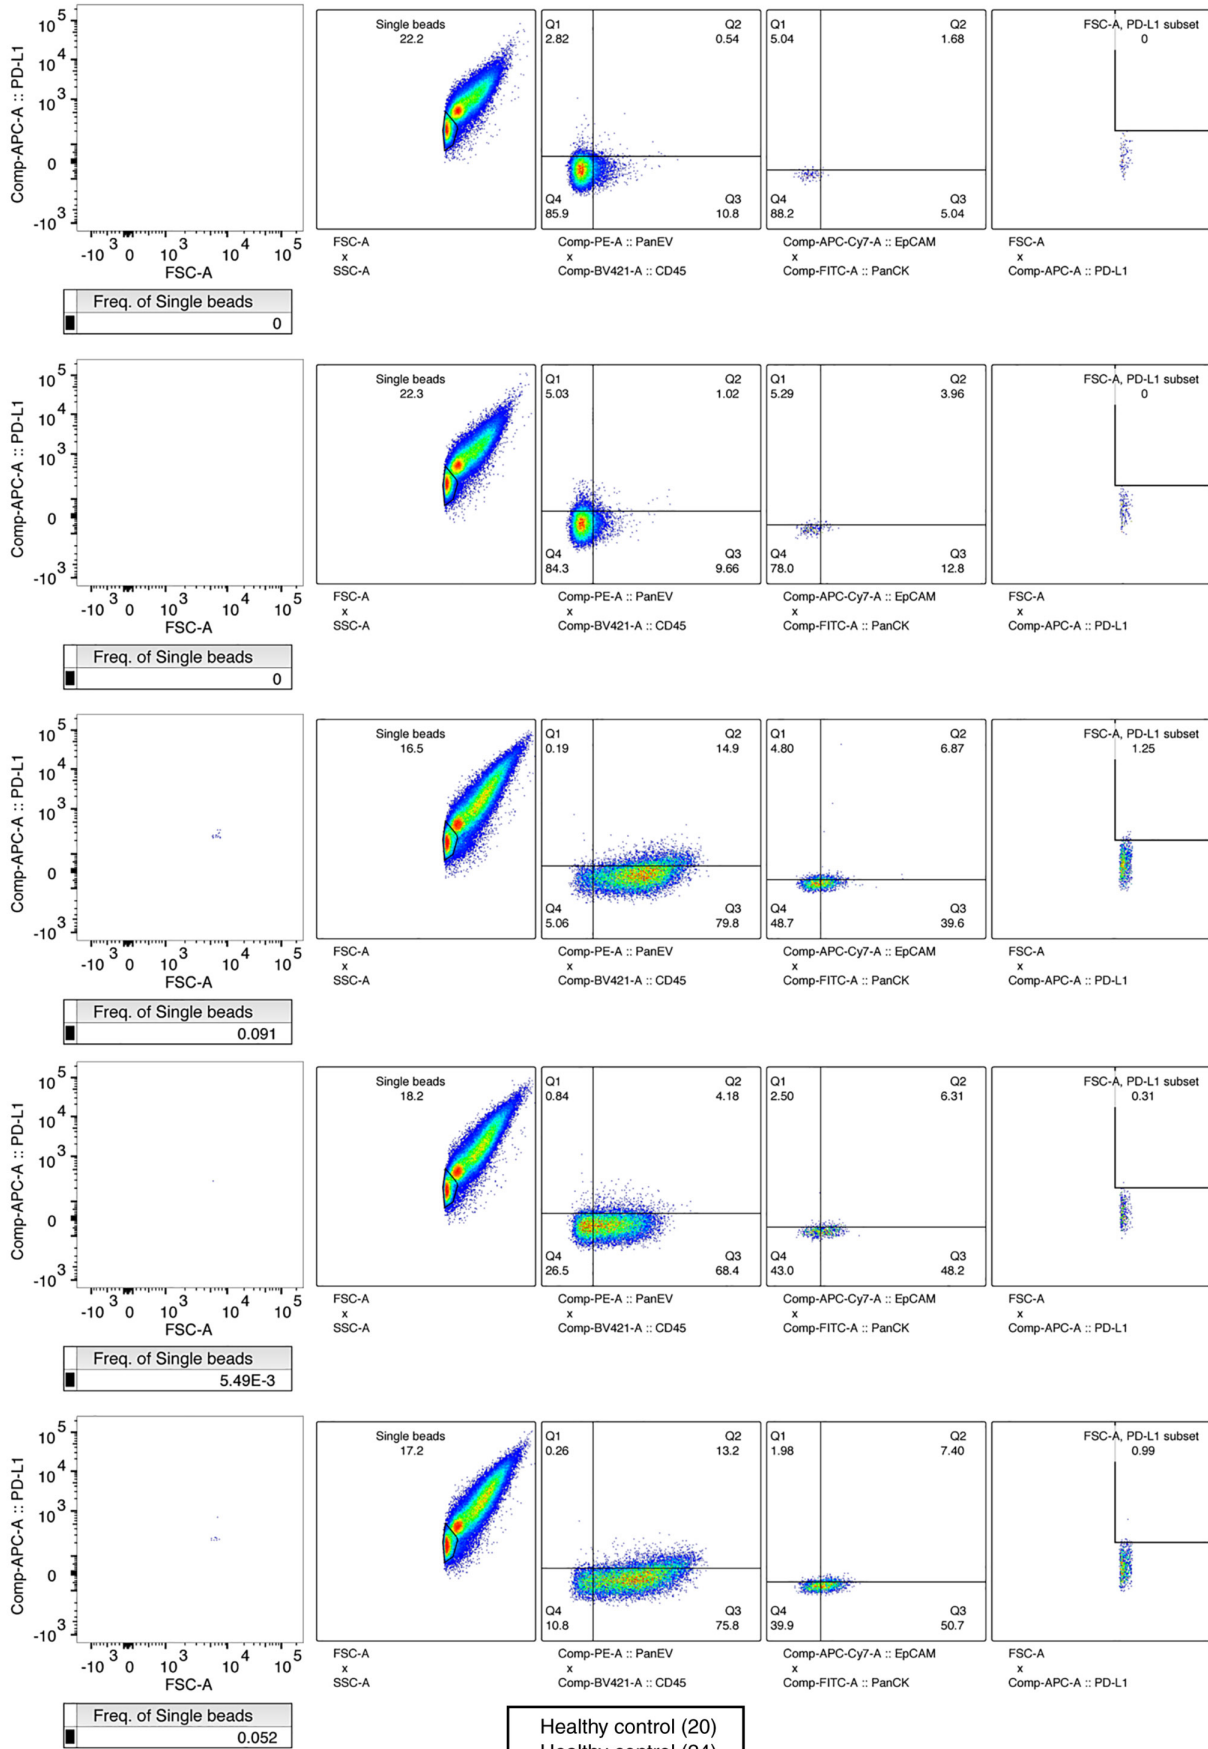

Healthy control (20)  
 Healthy control (24)  
 Healthy control (CL)  
 HNSCC (60)  
 HNSCC (64)

Figure S3. Continued.

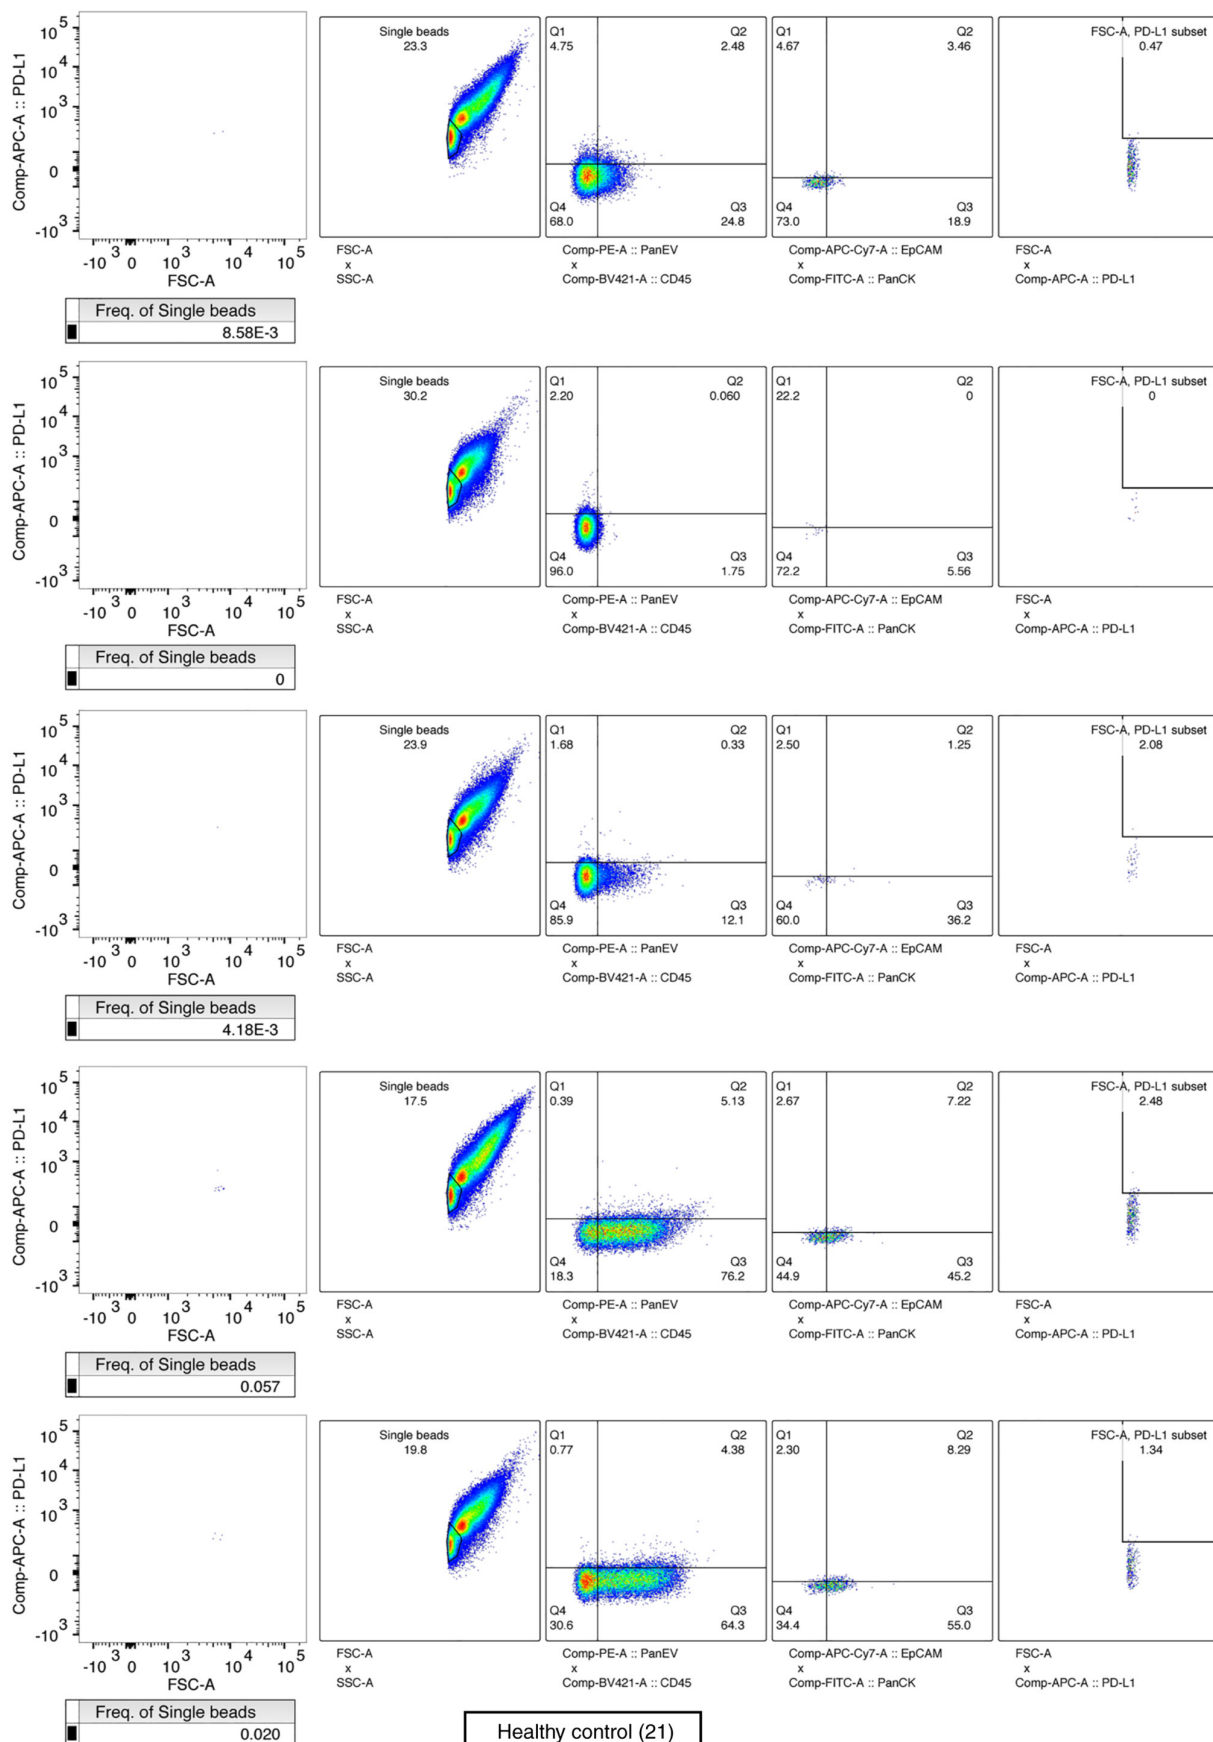

Healthy control (21)  
 EF (Negative control)  
 HNSCC (52)  
 HNSCC (61)  
 HNSCC (65)



Figure S3. Continued.

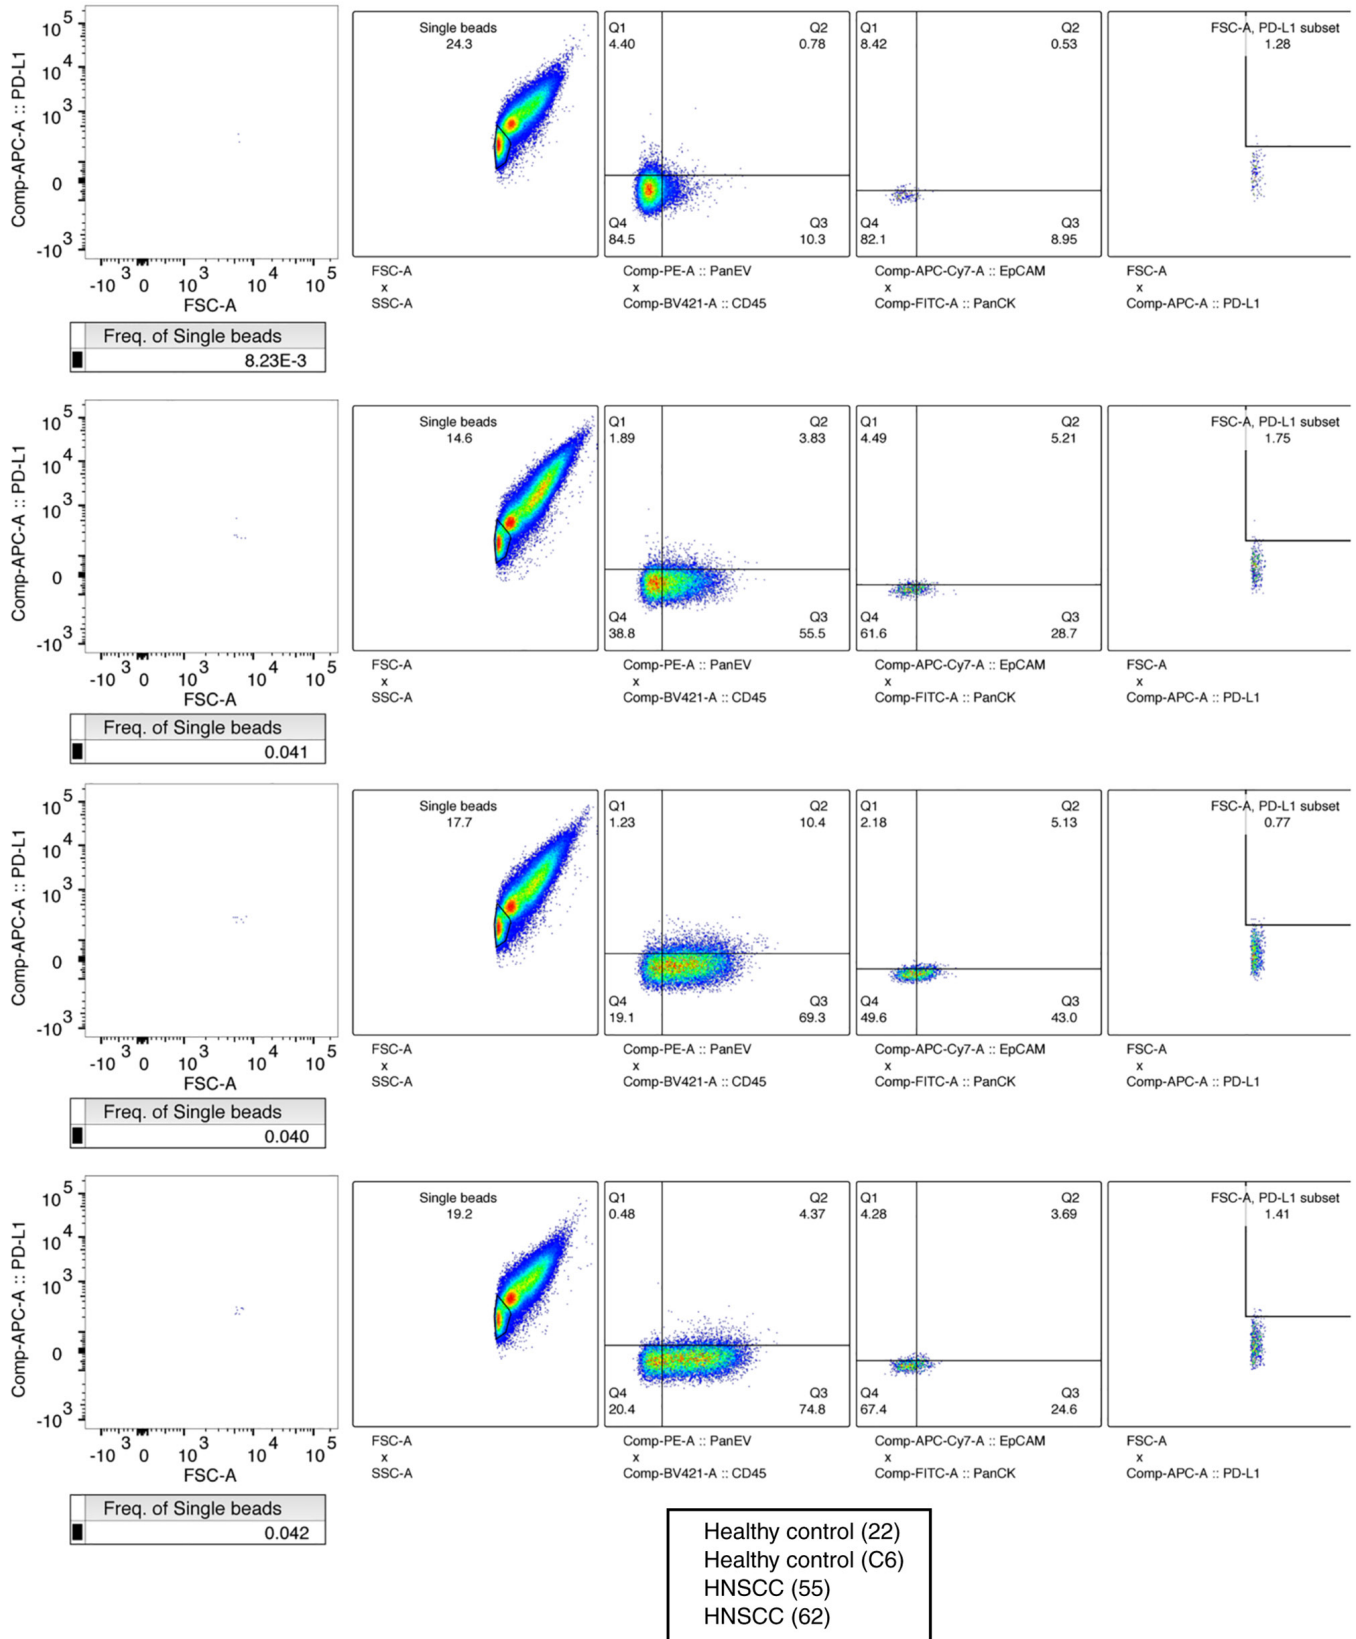

Figure S4. EVs functional assay of T cells and PBMCs activation. (A) 30  $\mu$ l out of 200  $\mu$ l eluted patient plasma EVs from EXÖBead® isolation and PEG EVs were treated with CD4<sup>+</sup> T cells in anti-CD2/3/28 antibodies activation condition. The Violin plot shows that CTLA4<sup>+</sup> CD69<sup>neg</sup> T cells emerged only when treated with eluted patient plasma EVs from EXÖBead®, PEG EVs and T cells activation. (B) The Violin plot shows that CTLA4<sup>+</sup> T cells only appeared when treated with eluted patient plasma EVs from EXÖBead®, PEG-EVs and activated T cells (A). Significance was calculated using the nonparametric Kruskal-Wallis test with Dunn's multiple comparison test. (C) 5x10<sup>7</sup> particles of eluted patient or control plasma EVs from EXÖBead® isolation were treated with 1x10<sup>6</sup> PBMCs (ratio: 50:1) under anti-CD2/3/28 antibody activation conditions. Violin plot showed that CD69<sup>+</sup> PD-L1<sup>+</sup> live CD4<sup>+</sup> T cells were derived from treatment with elution buffer alone, from plasma EVs from HNSCC patients (n=13, with technological triplicate) and from EVs from healthy controls (n=3, with technological triplicate). (D) The violin plot shows that CD69<sup>+</sup> PD1<sup>+</sup> CD4<sup>+</sup> T cells showed no significant difference between treatment with elution buffer alone, treatment with plasma EVs from HNSCC patients (n=13, with technological triplicates), and treatment with EVs from healthy controls (n=3, with technological triplicates). (E) Significance was calculated using Brown-Forsythe and Welch's ANOVA test with Dunnett's T3 multiple comparison test. The violin plot shows that single positive CD69<sup>+</sup>, PD1<sup>+</sup>, or PD-L1<sup>+</sup> live CD4<sup>+</sup> T cells showed no significant difference between treatment with elution buffer alone, from plasma EVs of HNSCC patients (n=13, with technological triplicates), and from EVs of healthy controls (n=3, with technological triplicates). Significance was calculated using Brown-Forsythe and Welch's ANOVA test with Dunnett's T3 multiple comparison test. EV, extracellular vesicle; PBMC, peripheral blood mononuclear cells.

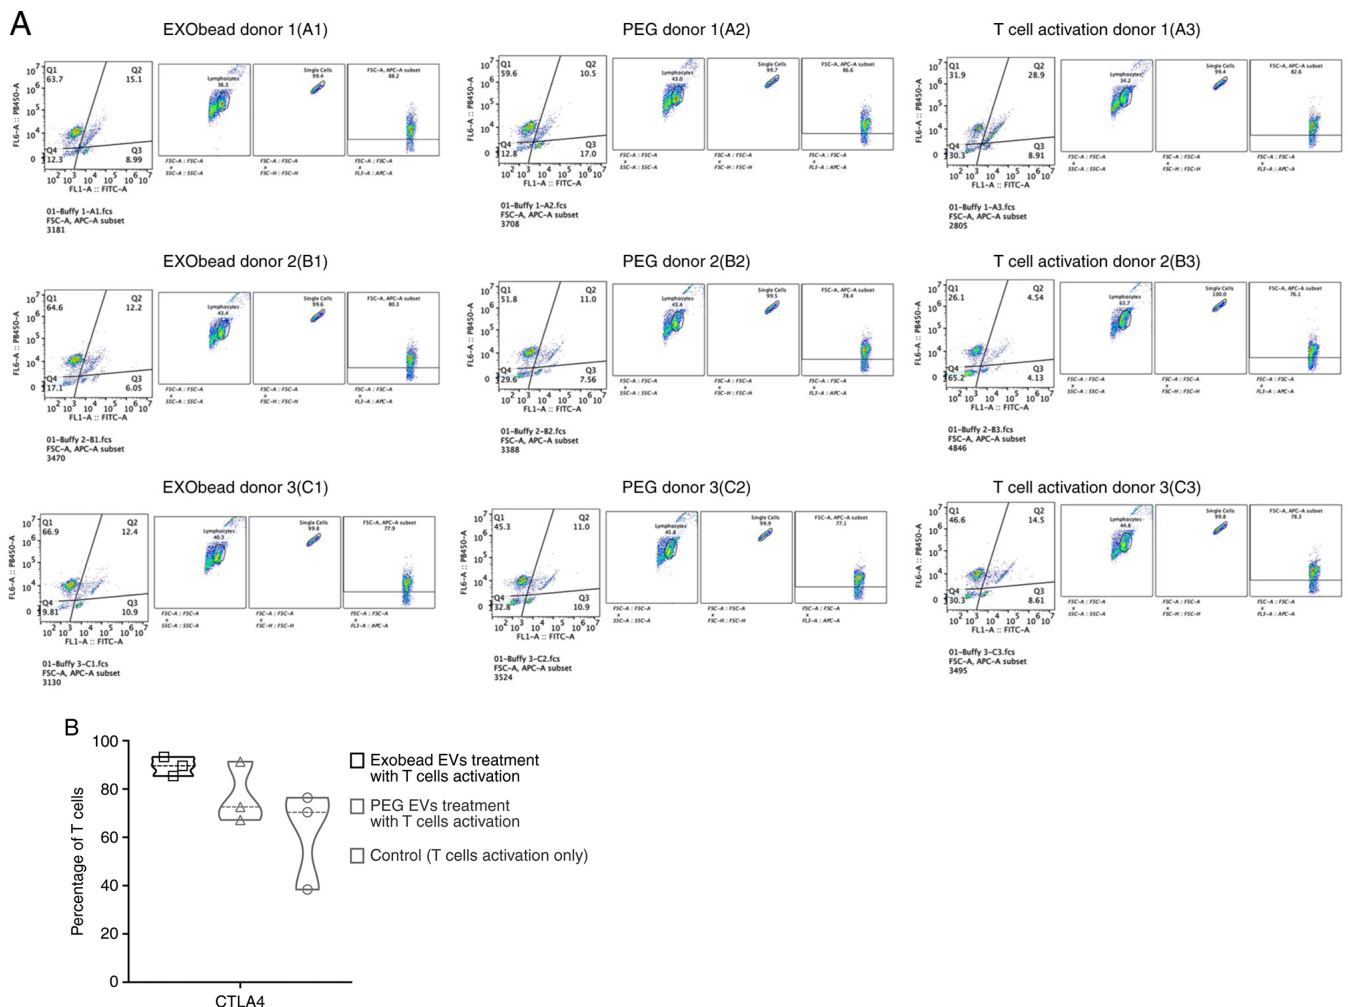

Figure S4. Continued.

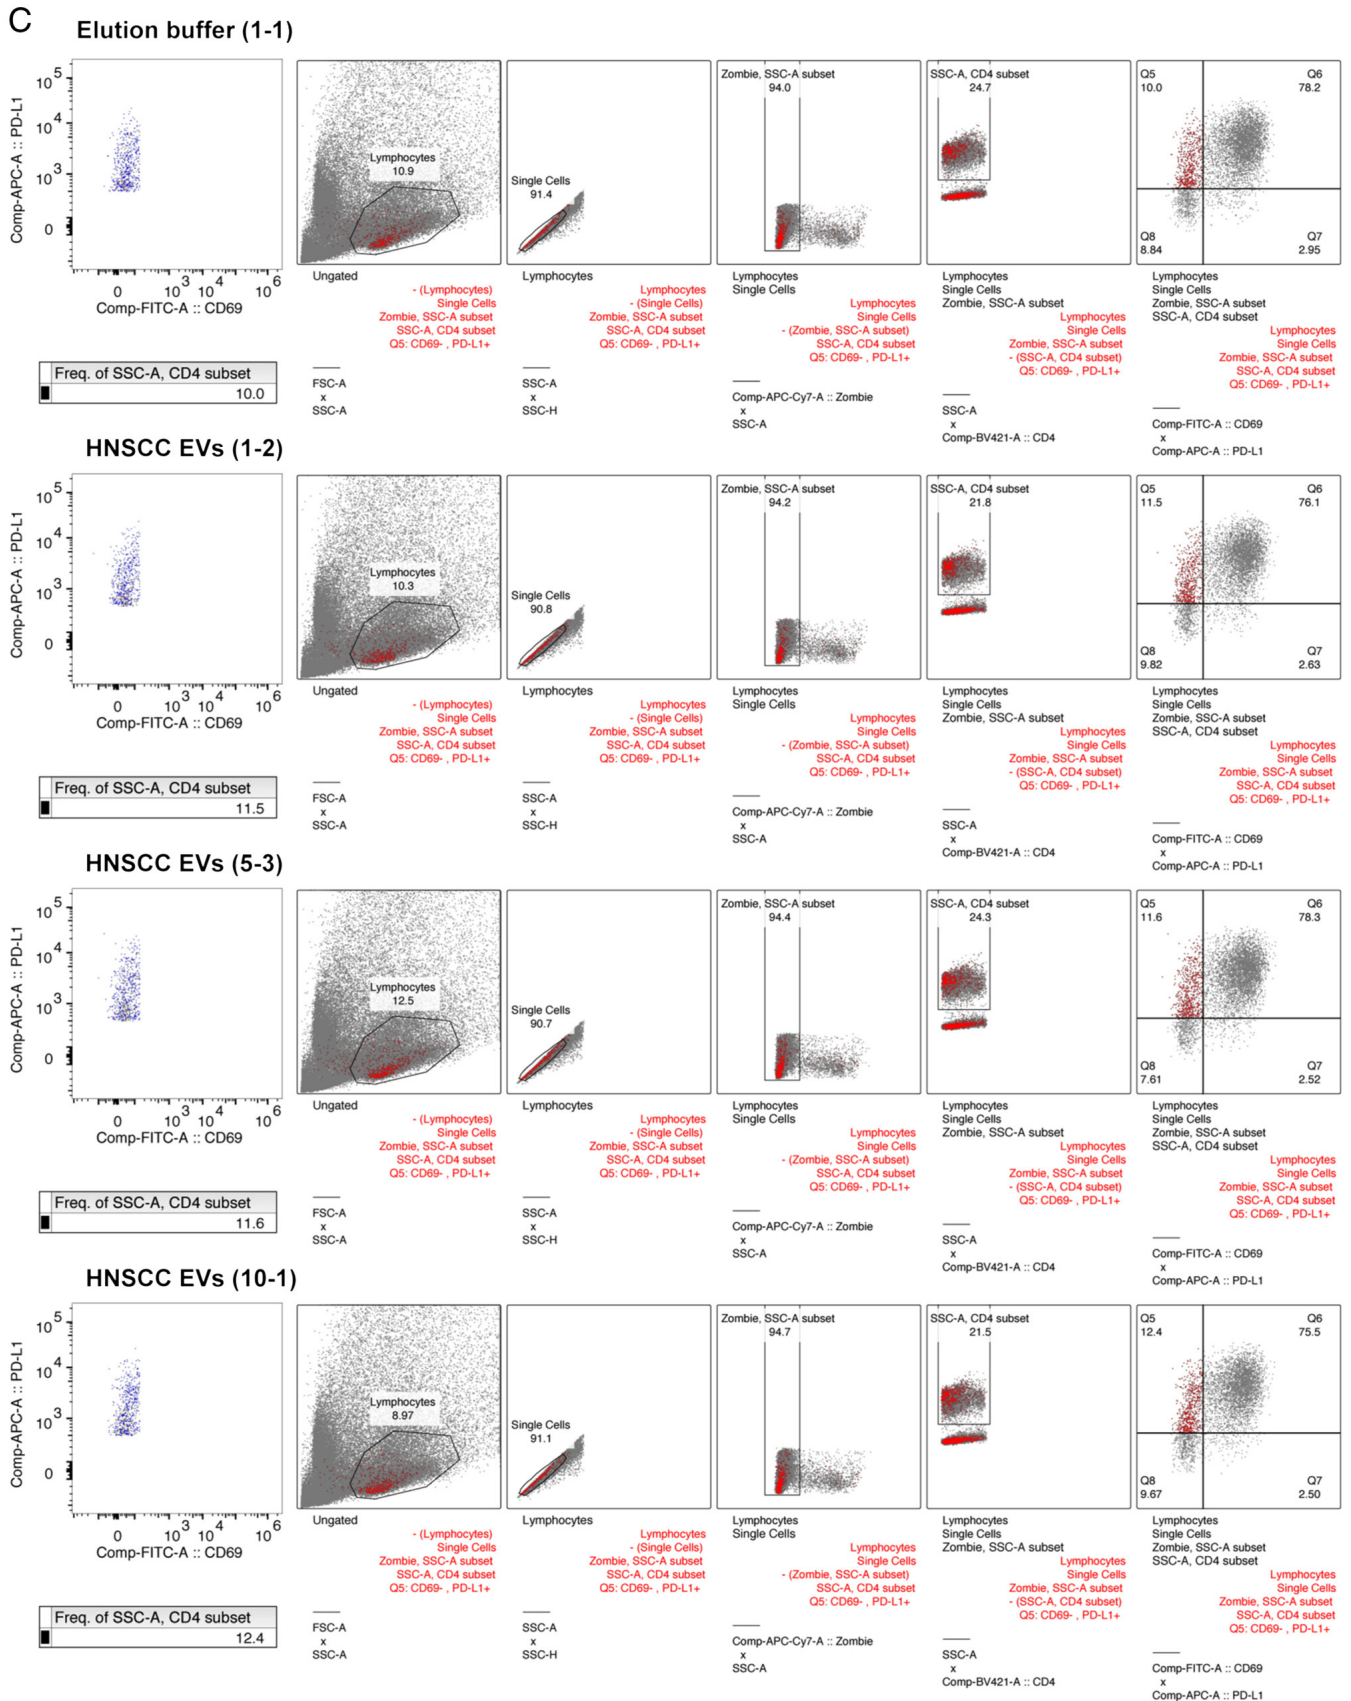





Figure S4. Continued.

Elution buffer (1-3)

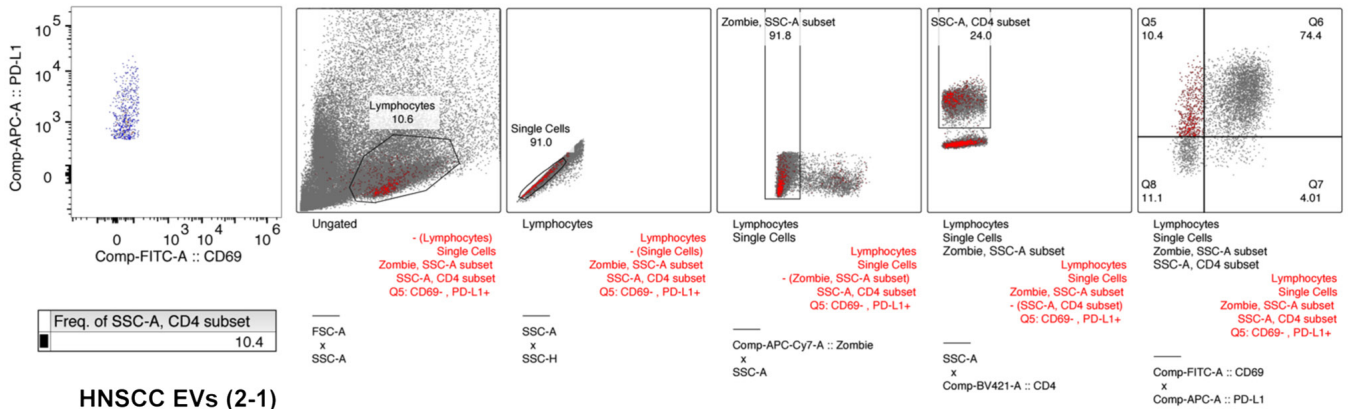

HNSCC EVs (2-1)

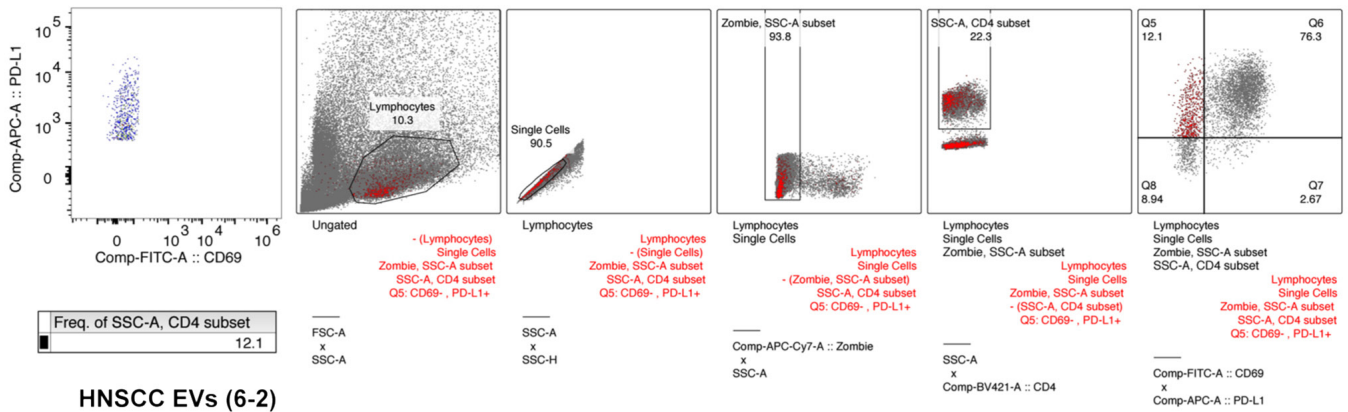

HNSCC EVs (6-2)

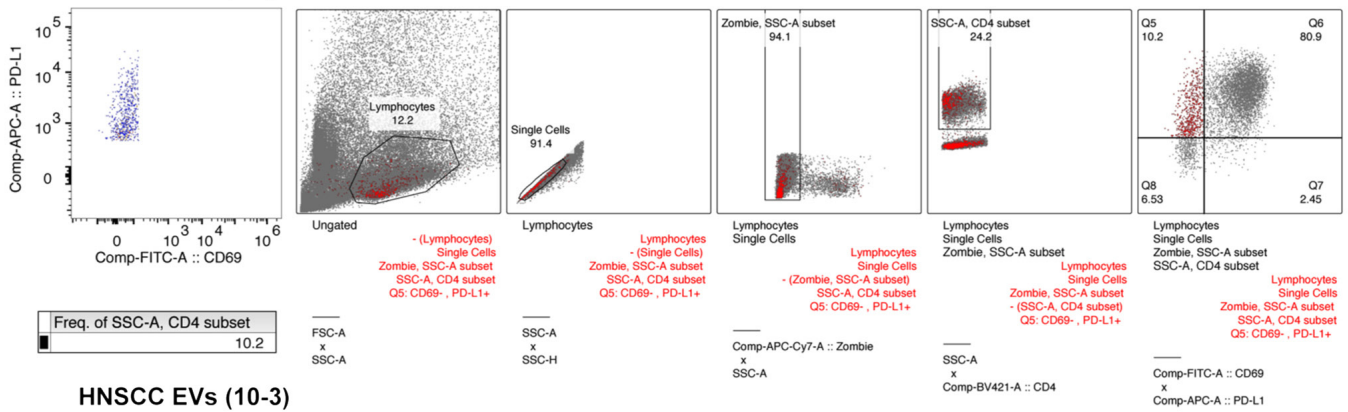

HNSCC EVs (10-3)

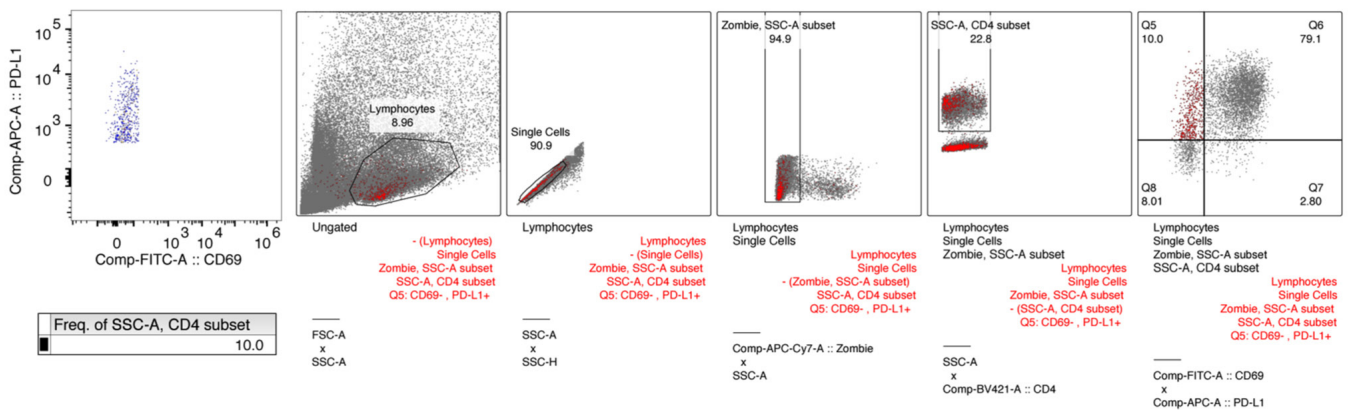



Figure S4. Continued.

Healthy control EVs (1-1)

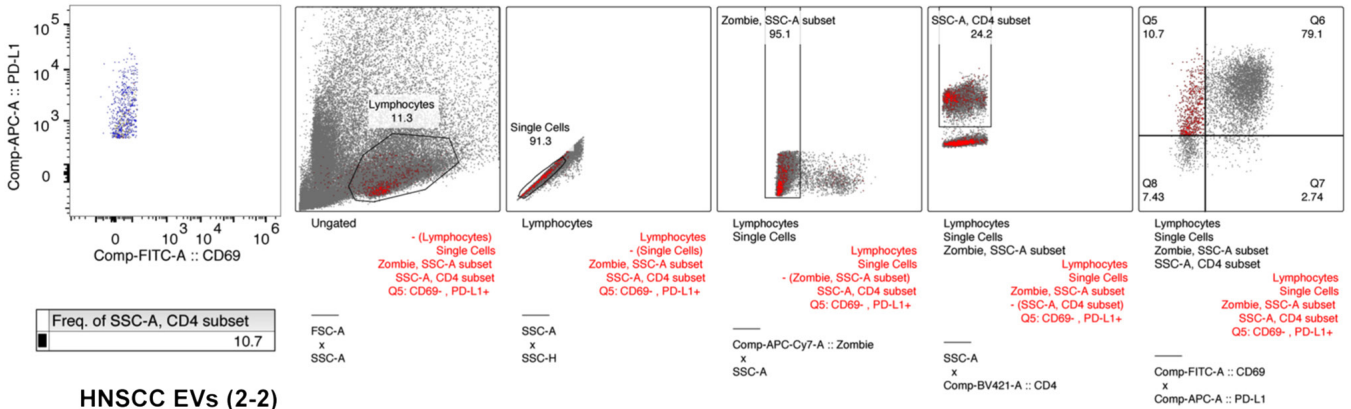

HNSCC EVs (2-2)

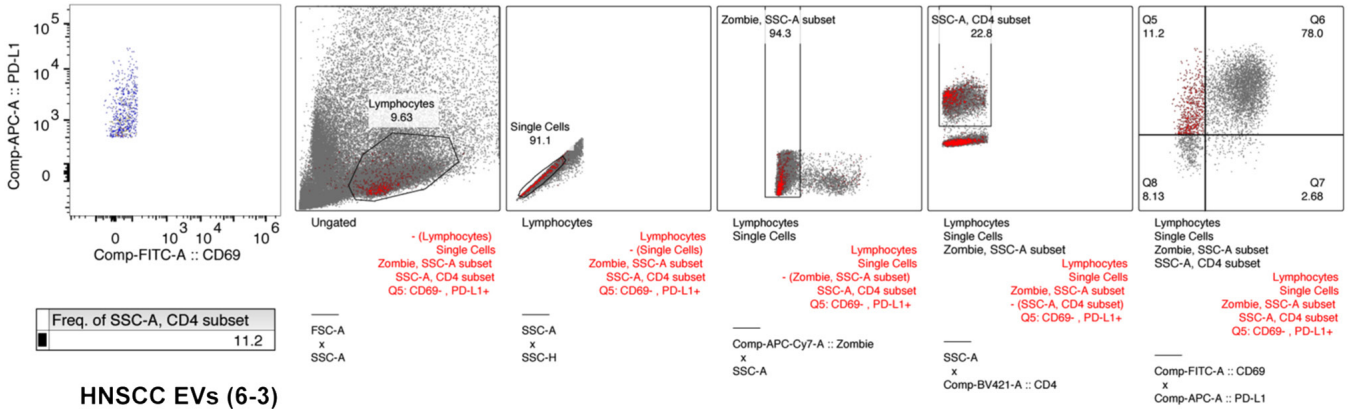

HNSCC EVs (6-3)

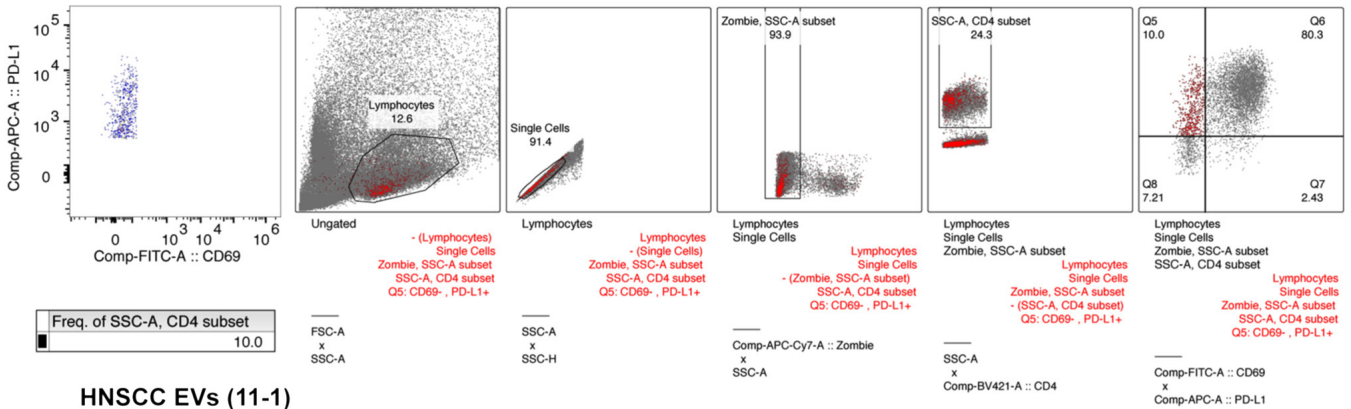

HNSCC EVs (11-1)

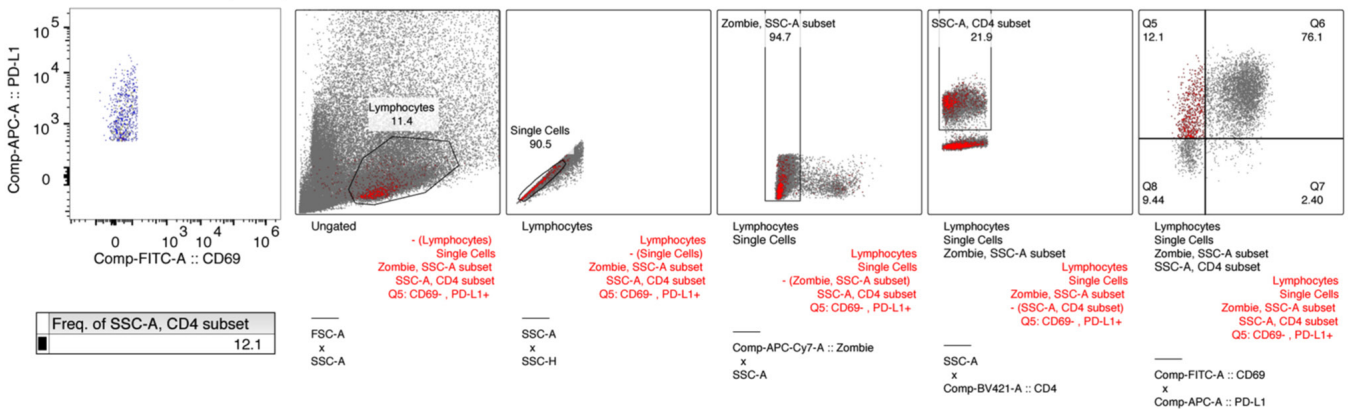

Figure S4. Continued.

Healthy control EVs (1-2)

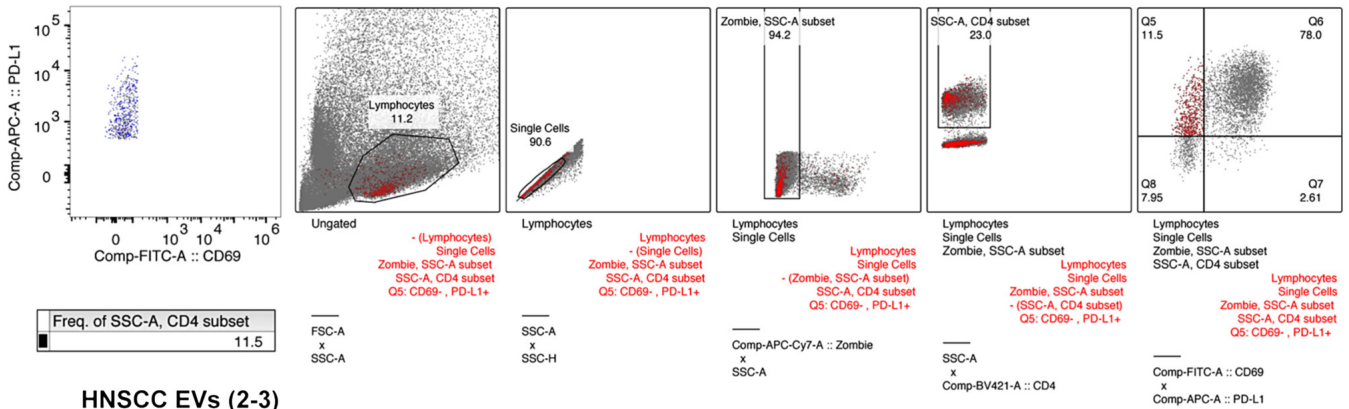

HNSCC EVs (2-3)

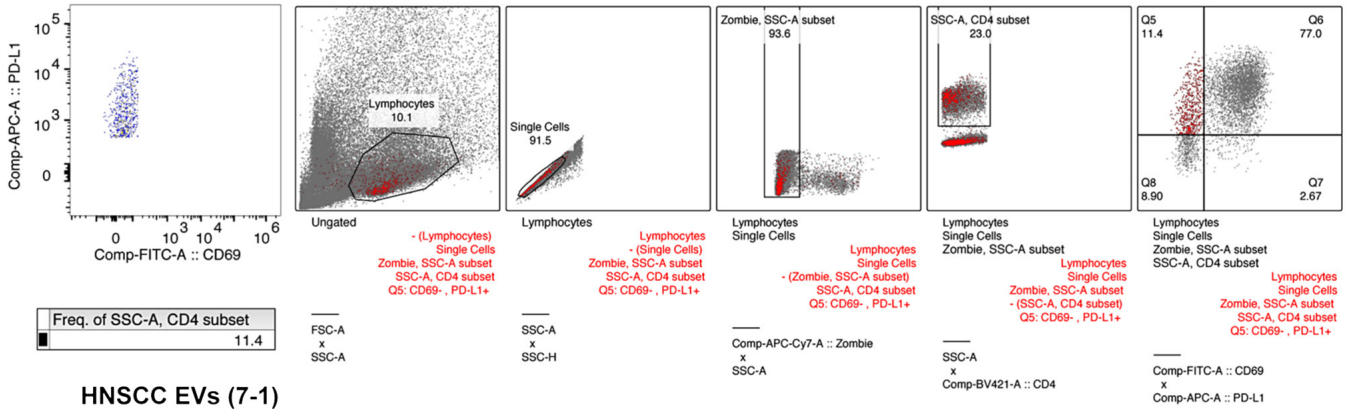

HNSCC EVs (7-1)

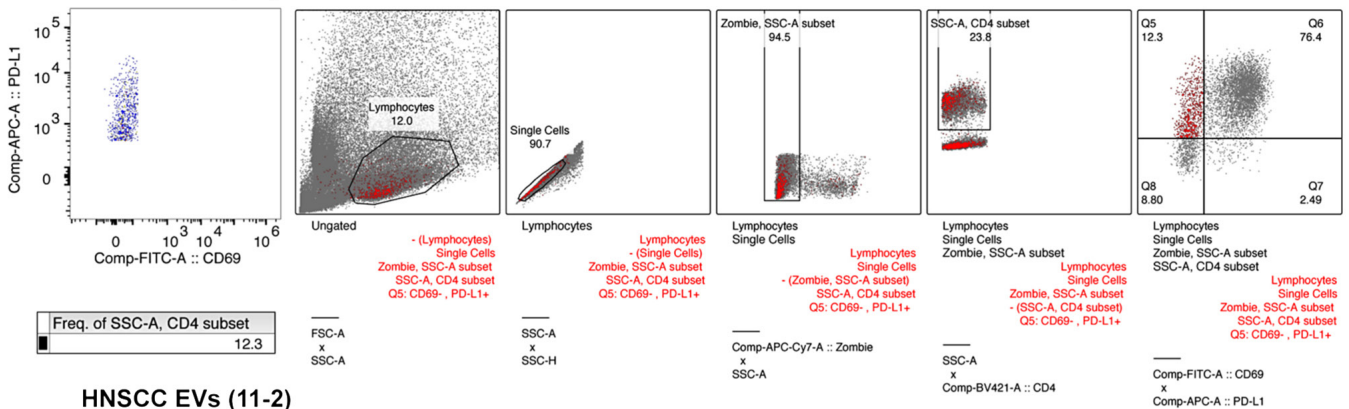

HNSCC EVs (11-2)

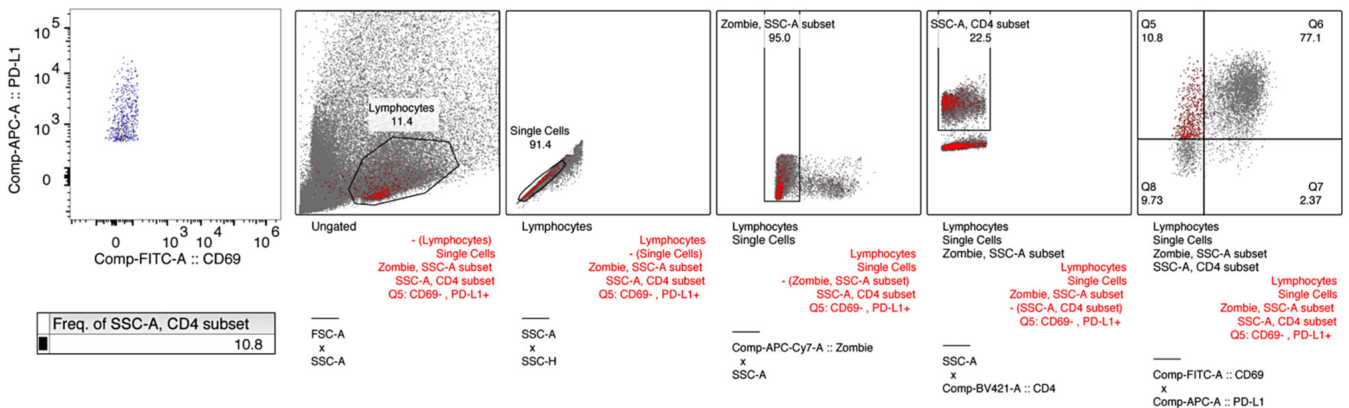

Figure S4. Continued.

Healthy control EVs (1-3)

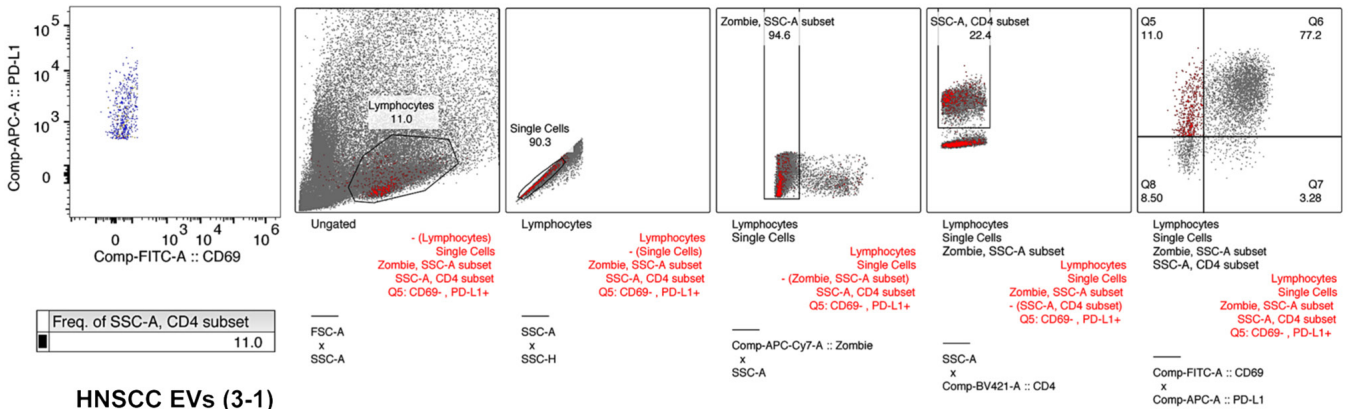

HNSCC EVs (3-1)

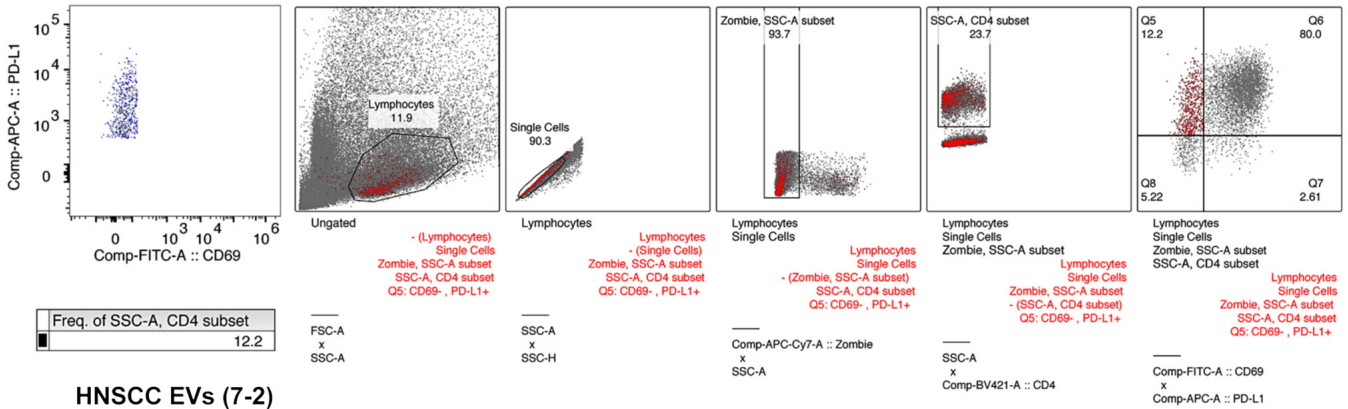

HNSCC EVs (7-2)

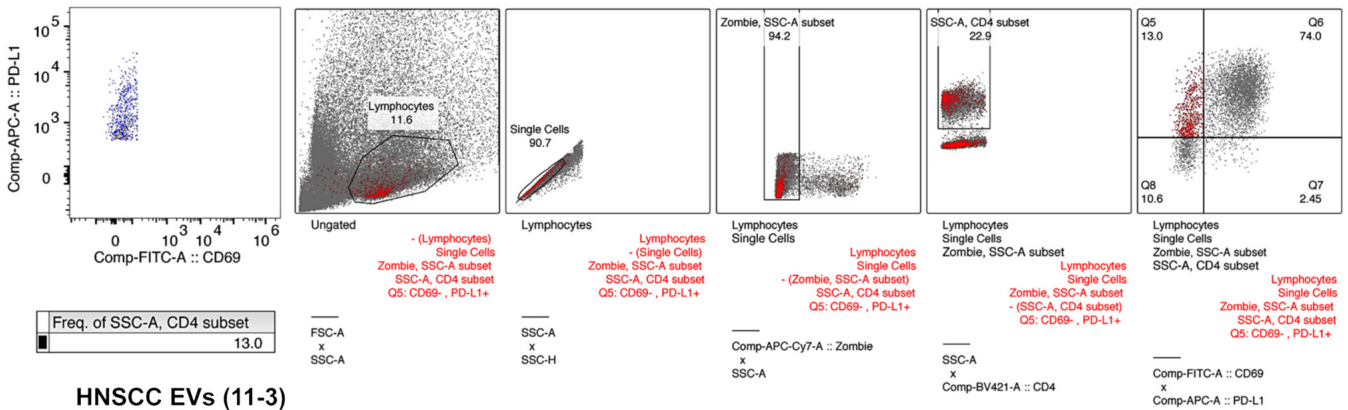

HNSCC EVs (11-3)

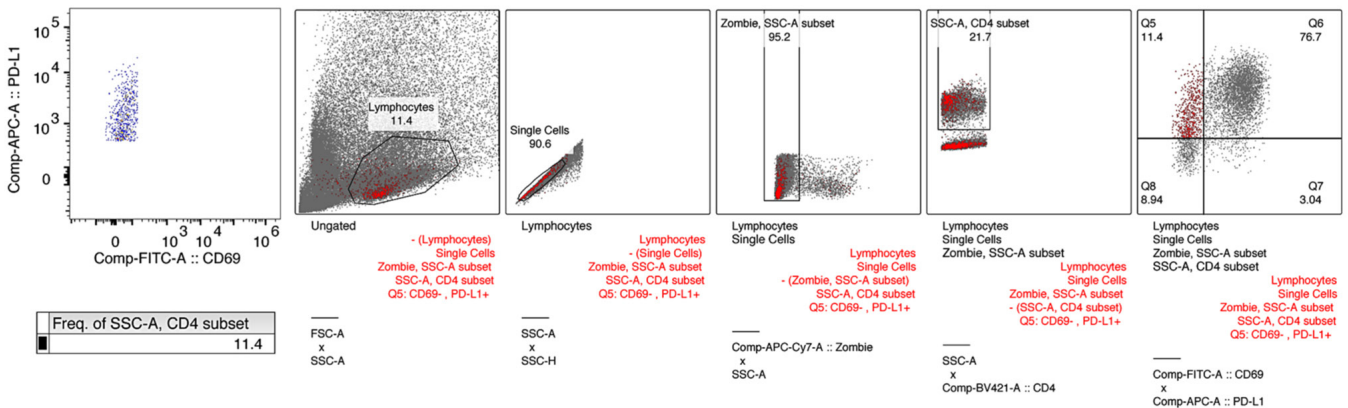





Figure S4. Continued.

Healthy controls EVs (2-2)

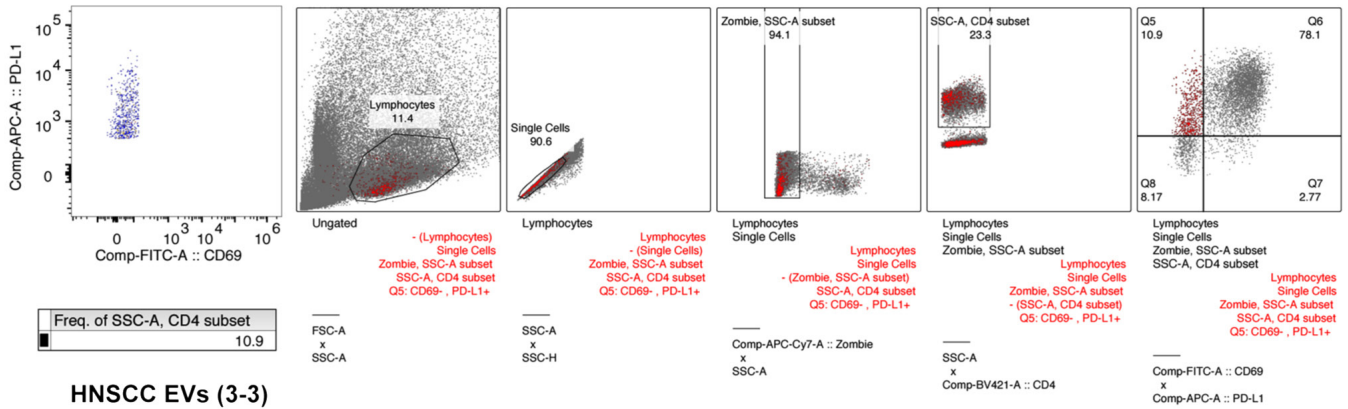

HNSCC EVs (3-3)

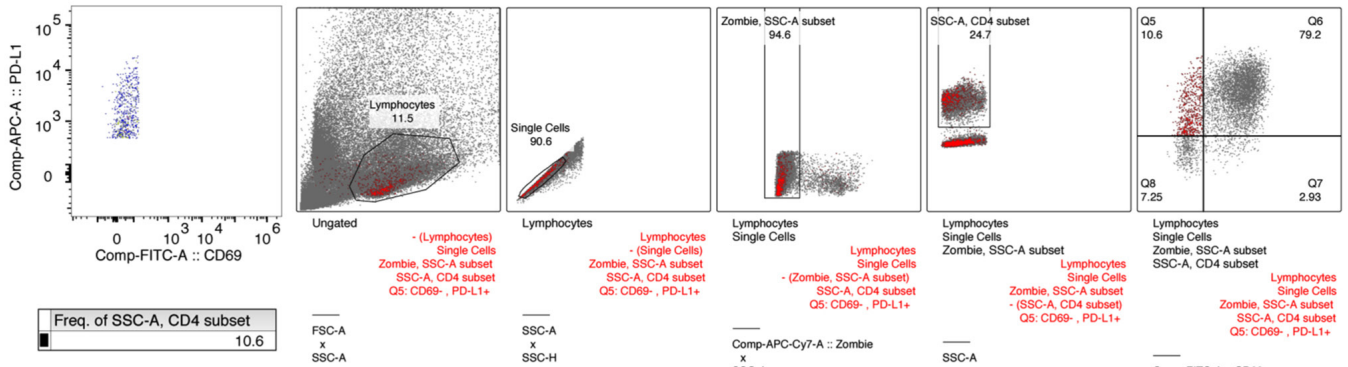

HNSCC EVs (8-1)

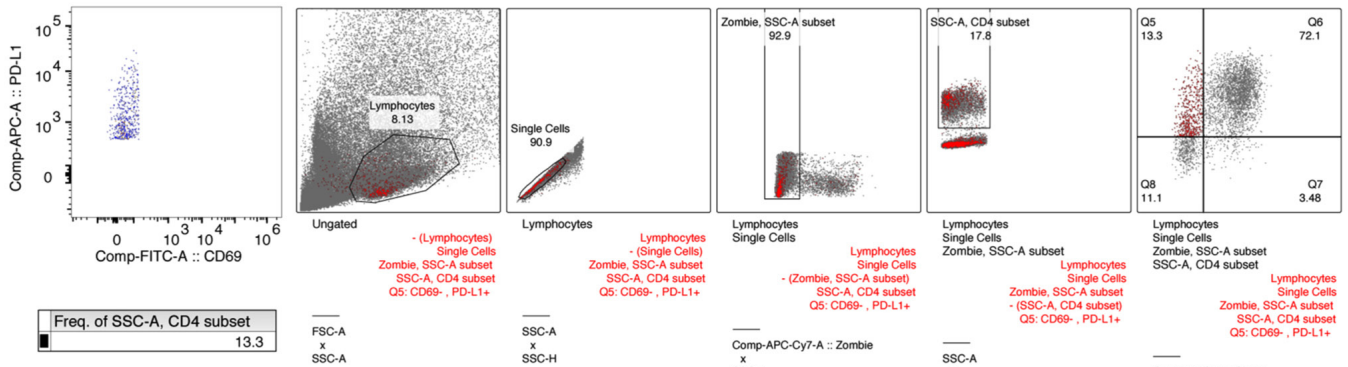

HNSCC EVs (12-2)

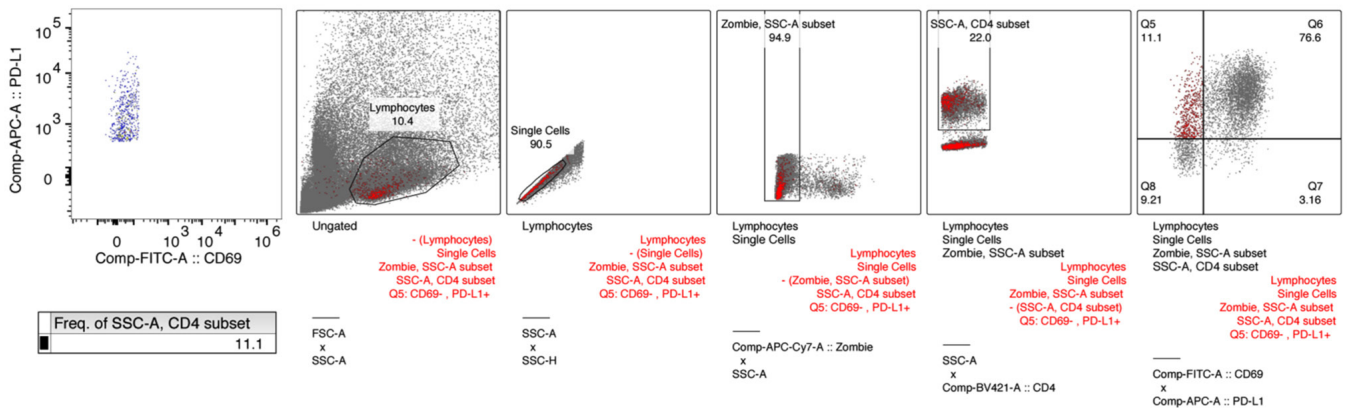



Figure S4. Continued.

Healthy controls EVs (2-3)

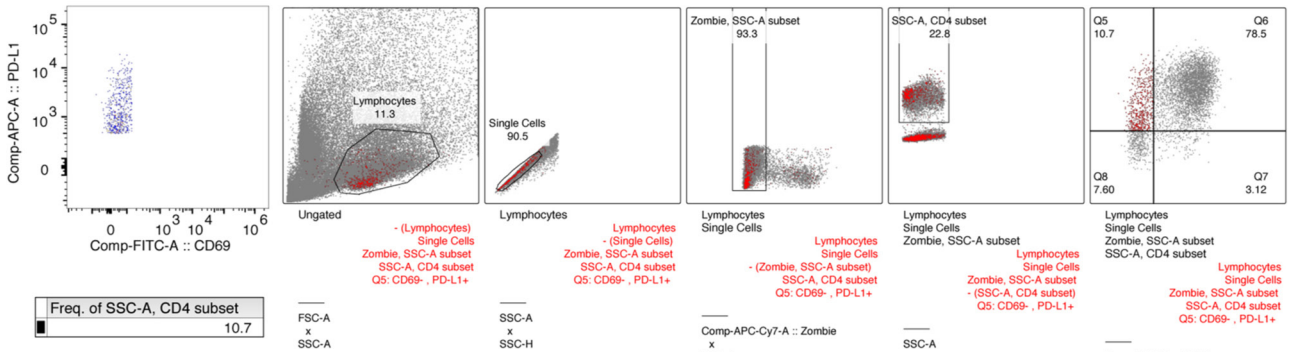

HNSCC EVs (4-1)

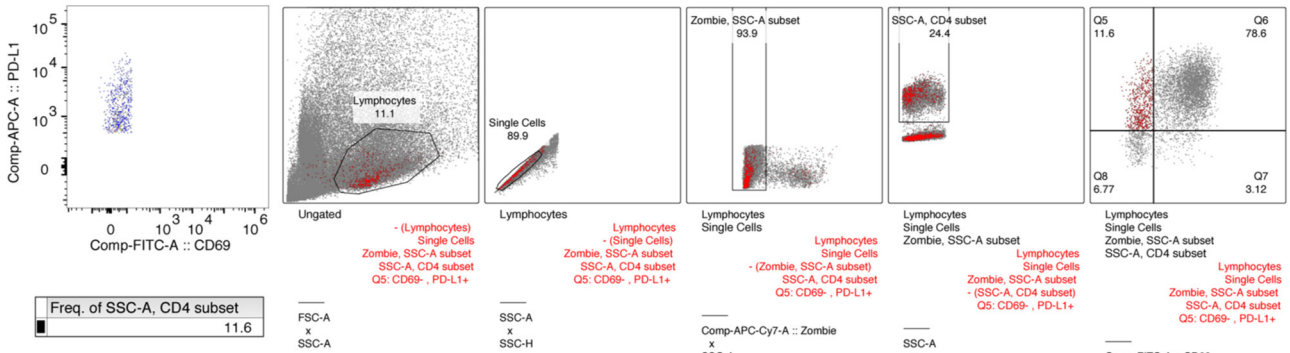

HNSCC EVs (8-2)

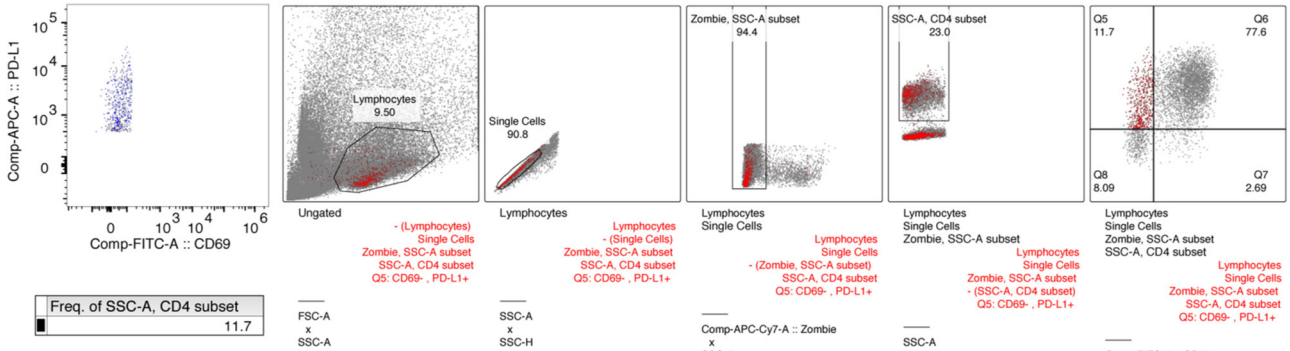

HNSCC EVs (12-3)

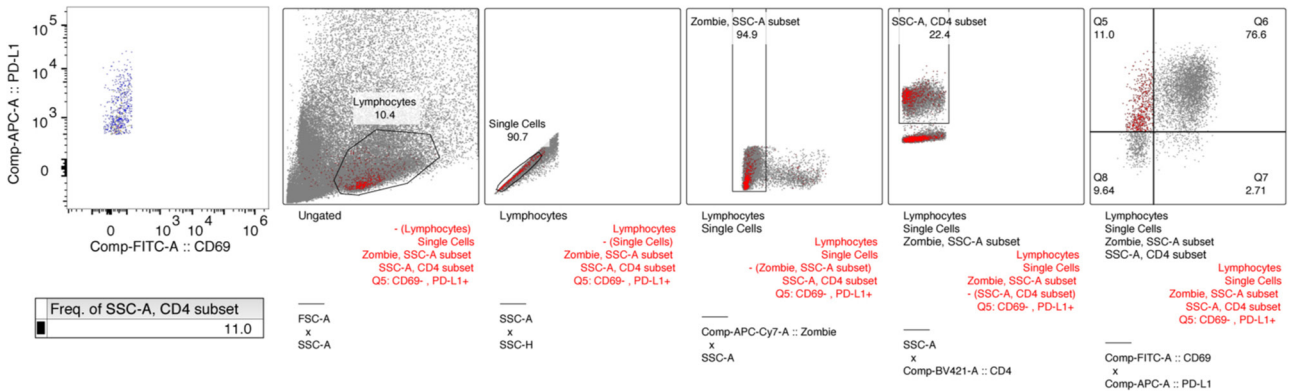

Figure S4. Continued.

Healthy controls EVs (3-1)

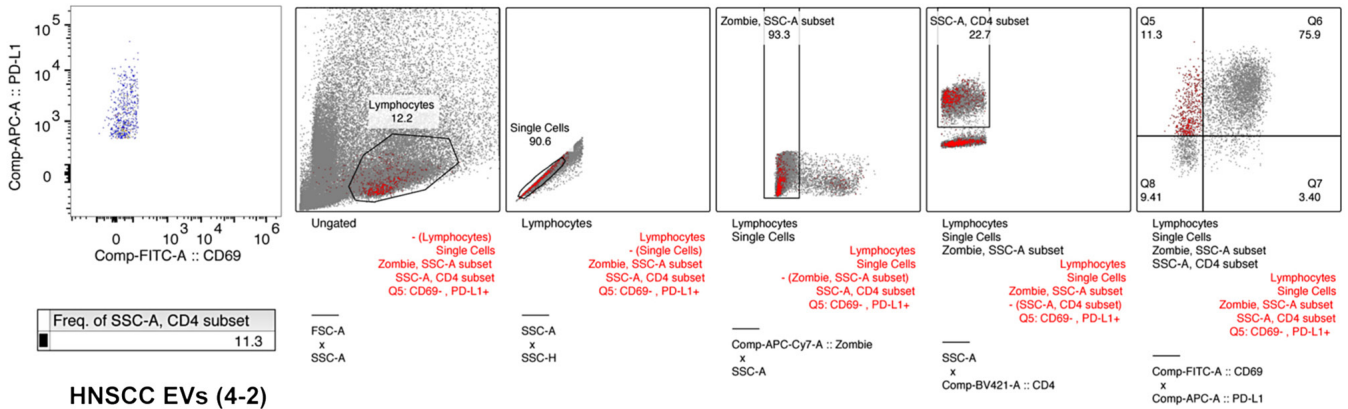

HNSCC EVs (4-2)

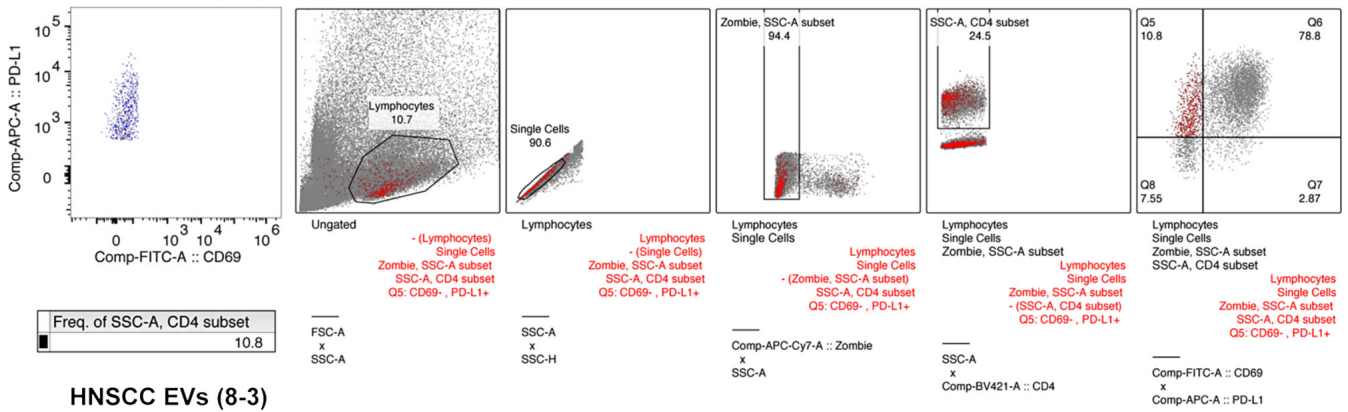

HNSCC EVs (8-3)

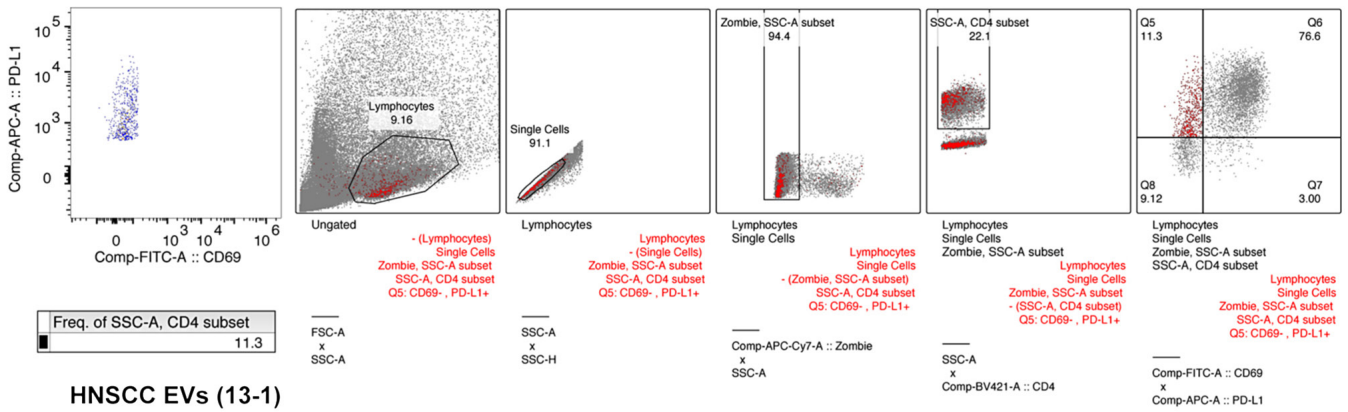

HNSCC EVs (13-1)

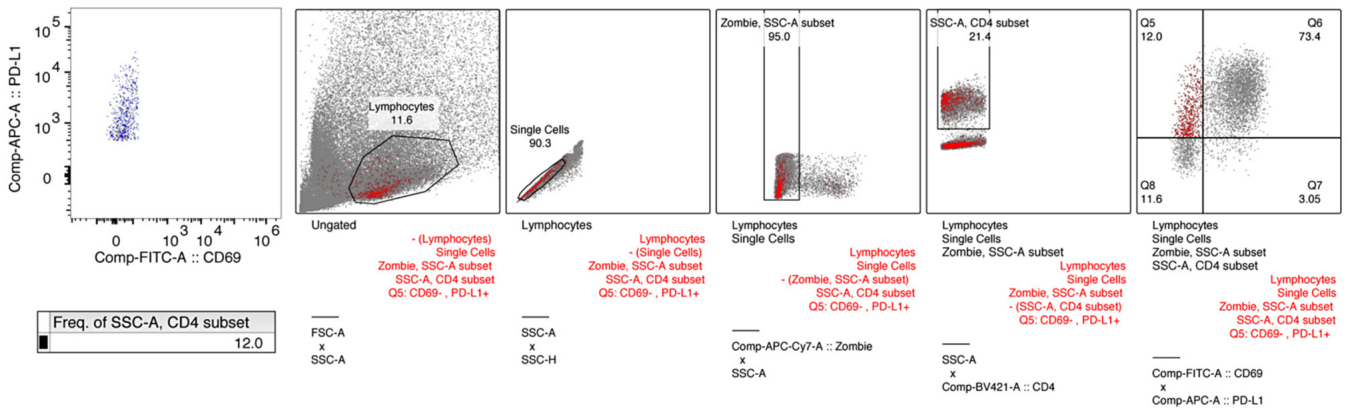

Figure S4. Continued.

Healthy controls EVs (3-2)

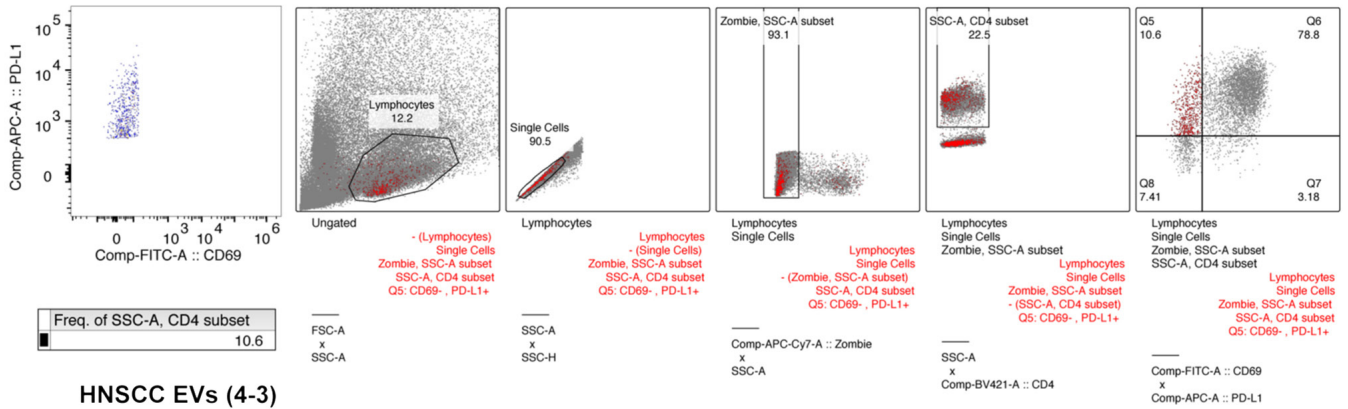

HNSCC EVs (4-3)

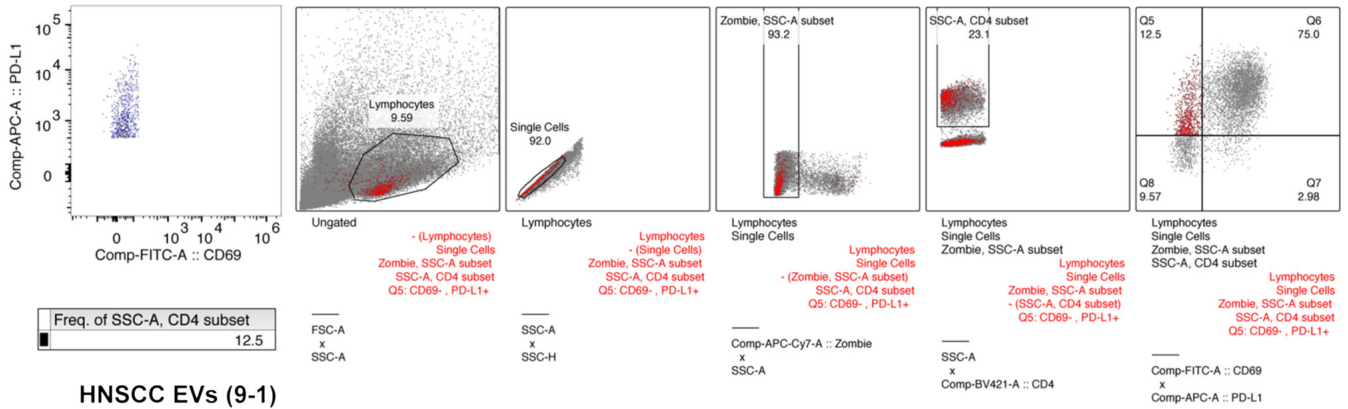

HNSCC EVs (9-1)

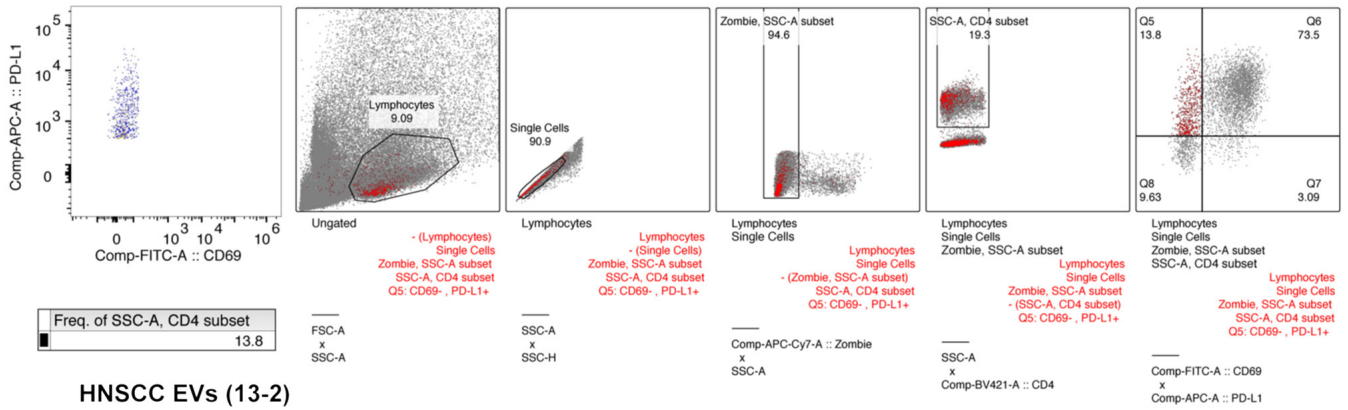

HNSCC EVs (13-2)

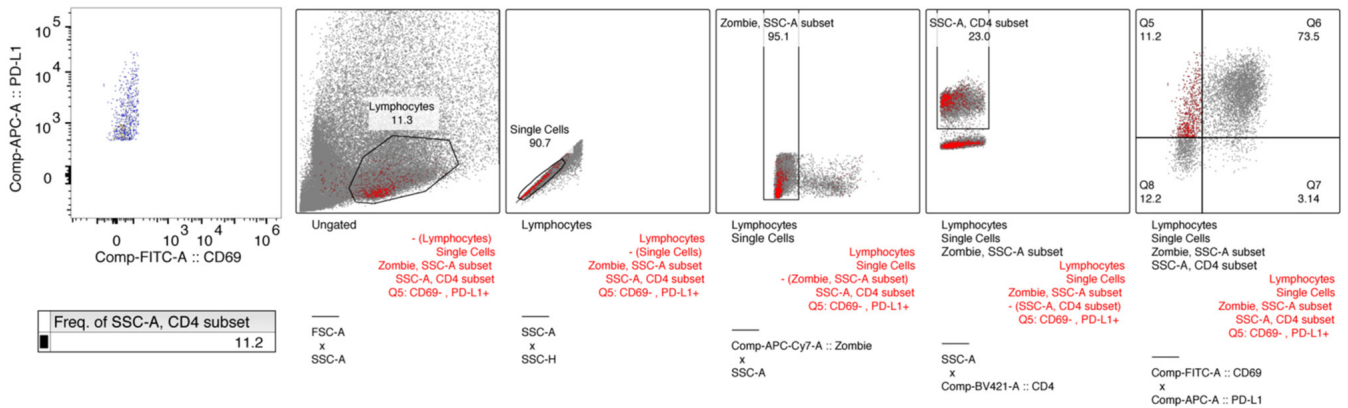



Figure S4. Continued.

Healthy controls EVs (3-3)

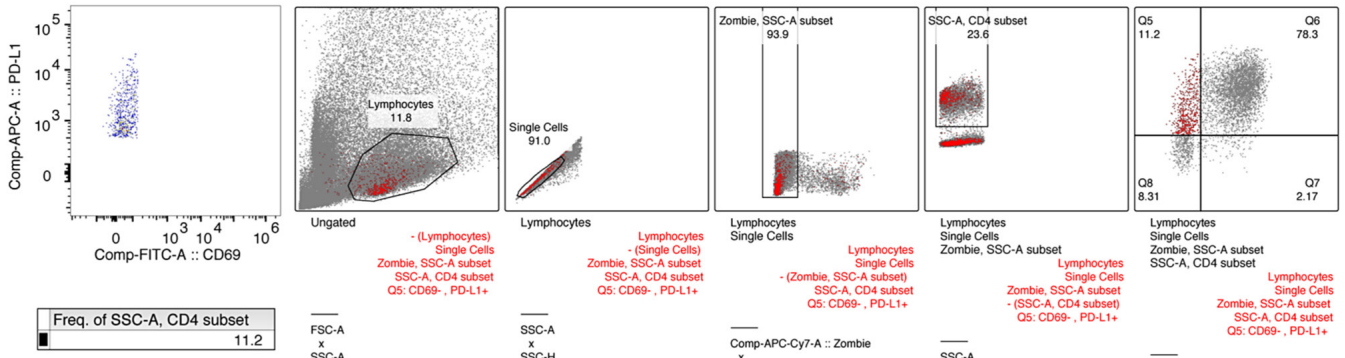

HNSCC EVs (5-1)

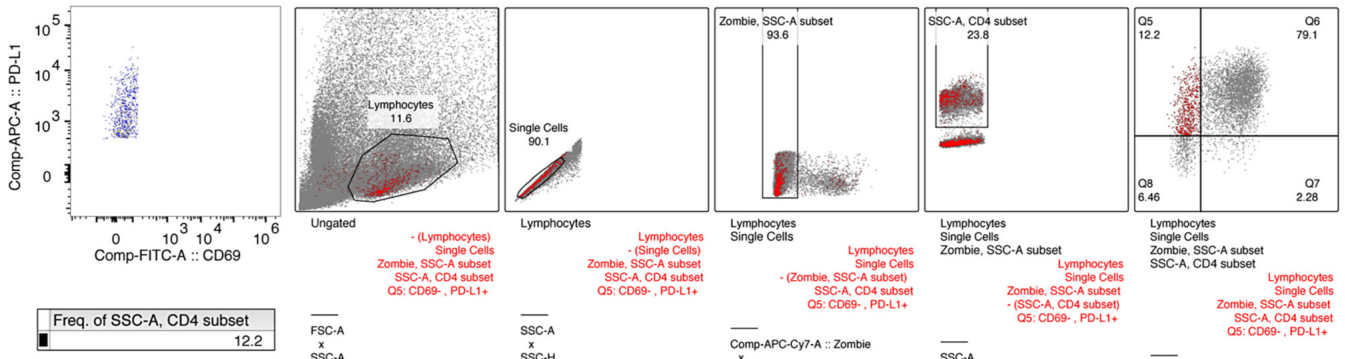

HNSCC EVs (9-2)

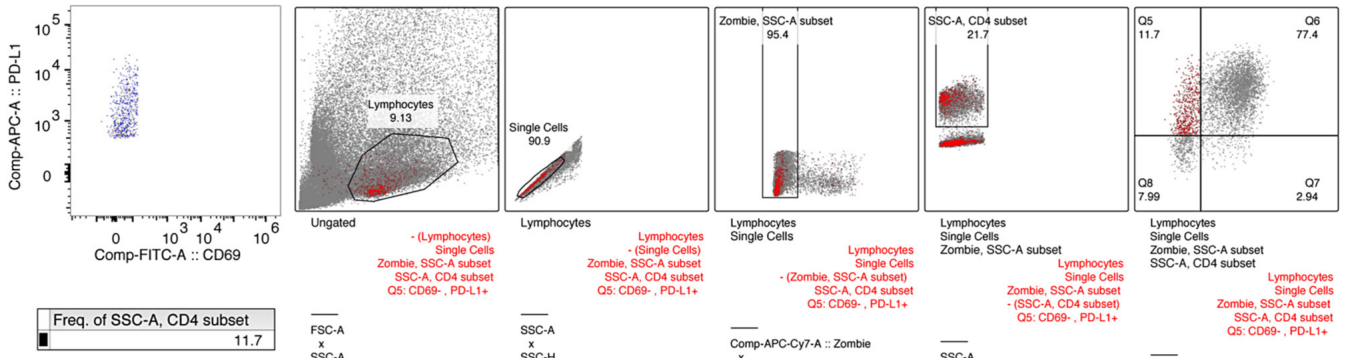

HNSCC EVs (13-3)

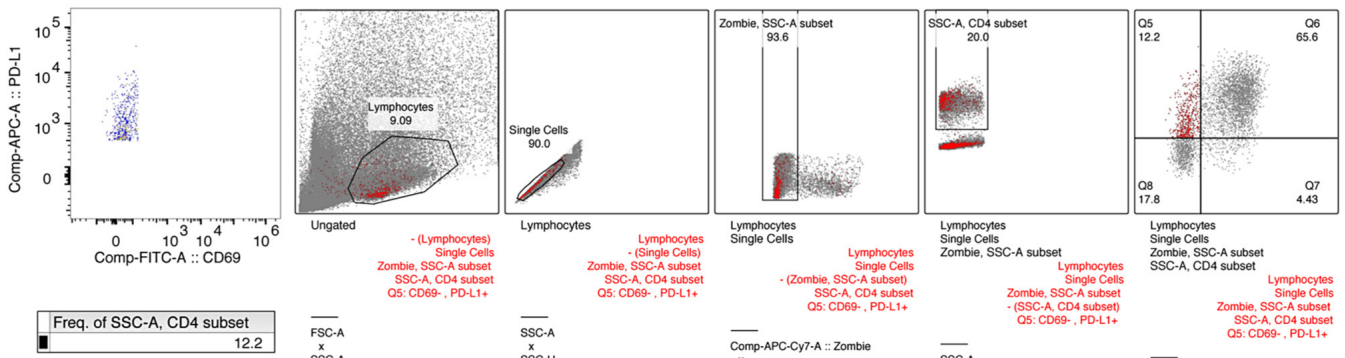

Figure S4. Continued.

HNSCC EVs (1-1)

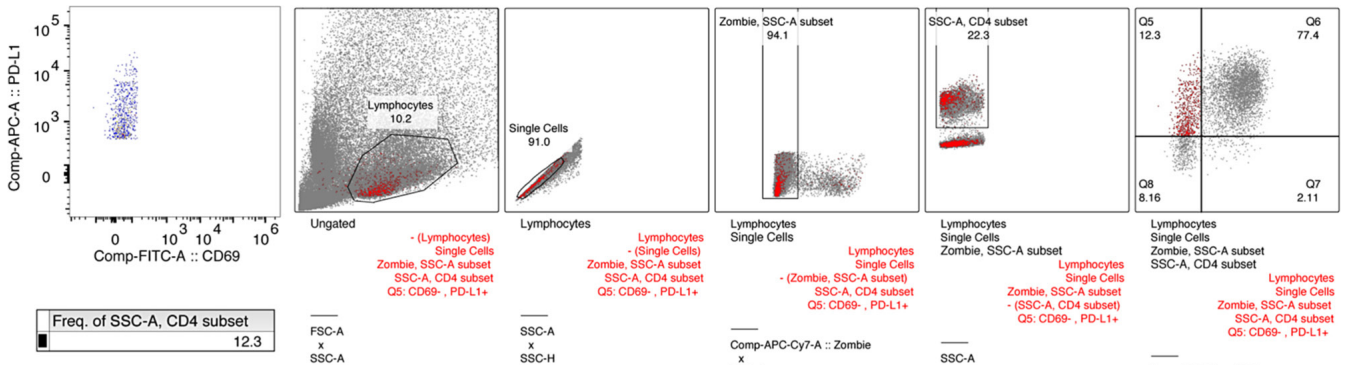

HNSCC EVs (5-2)

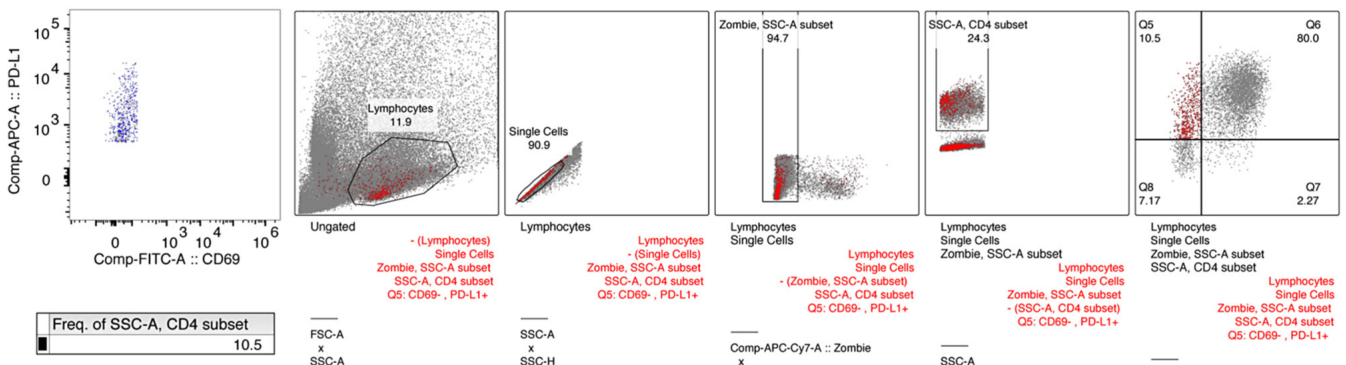

HNSCC EVs (9-3)

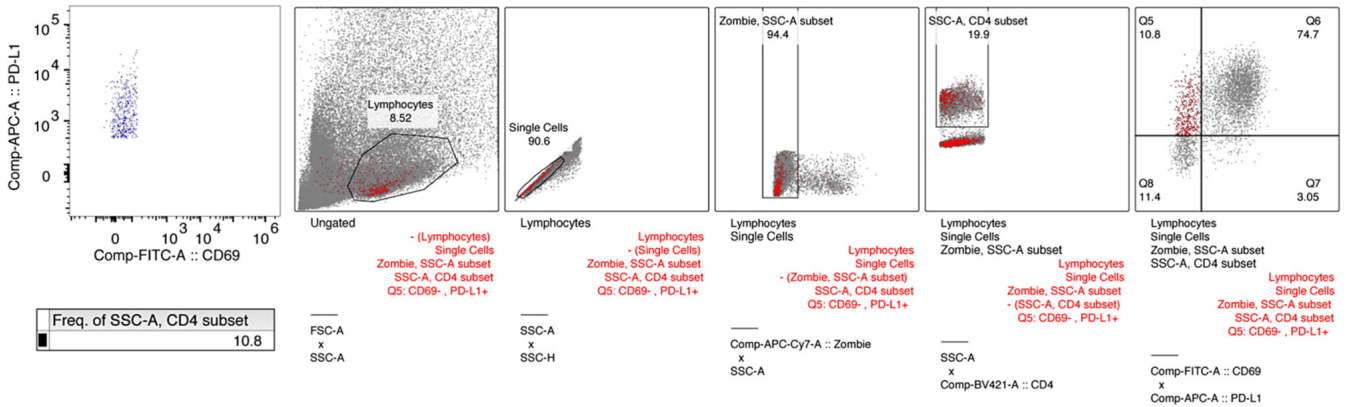

Figure S4. Continued.

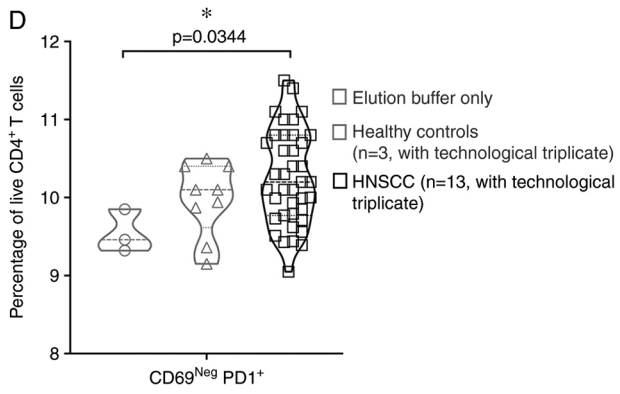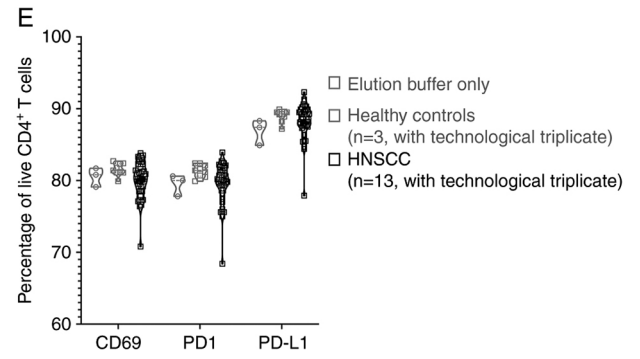

Supplement: Supplementary_Data.pdf [file Supplementary_Data.pdf]
